# Supplementary material
Source: PubMed Central journal article supplement (PMC2755215)

**Asymmetric Total Synthesis of (-)-Plicatic Acid via a Highly Enantioselective and Diastereoselective Nucleophilic Epoxidation of Acyclic Trisubstituted Olefins**

Bing-Feng Sun, Ran Hong, Yan-Biao Kang and Li Deng\*

*Department of Chemistry, Brandeis University, Waltham, Massachusetts 02454-9110*

*E-mail: deng@brandeis.edu*

**Supporting Information**

**Contents**

|                                                                                                                                     | <b>Page</b> |
|-------------------------------------------------------------------------------------------------------------------------------------|-------------|
| 1. General Information                                                                                                              | S2          |
| 2. Experimental Procedures for preparation of <b>3b-i</b> , <b>4b-i</b>                                                             | S2          |
| 3. Experimental Procedures for preparation of <b>13-20</b> , <b>1</b>                                                               | S10         |
| 4. Copies of <sup>1</sup> H NMR and <sup>13</sup> C NMR spectra of <b>3b-i</b>                                                      | S26         |
| 5. Copies of <sup>1</sup> H NMR and <sup>13</sup> C NMR spectra of <b>4b-i</b>                                                      | S33         |
| 6. HPLC chromatograms of <b>4b-i</b>                                                                                                | S42         |
| 7. Copies of <sup>1</sup> H NMR and <sup>13</sup> C NMR spectra of <b>7-13</b>                                                      | S46         |
| 8. HPLC chromatogram of <b>2a</b>                                                                                                   | S61         |
| 9. COSY, NOESY of <b>11</b>                                                                                                         | S68         |
| 10. <sup>1</sup> H NMR and <sup>13</sup> C NMR spectra of synthetic, authentic and mixture sample of (-)-Plicatic acid ( <b>1</b> ) | S75         |
| 11. VT- <sup>1</sup> H NMR spectra of authentic, synthetic and mixture sample of (-)-plicatic acid ( <b>1</b> )                     | S102        |
| 12. Comparison of <sup>1</sup> H NMR spectra of (-)-plicatic acid ( <b>1</b> ) at 70 °C                                             | S103        |
| 13. IR spectra of synthetic and authentic (-)-plicatic acid ( <b>1</b> )                                                            | S104        |
| 14. Low and High resolution mass spectra of synthetic and authentic (-)-plicatic acid ( <b>1</b> )                                  | S106        |
| 15. HPLC chromatograms of synthetic, authentic and mixture sample of (-)-plicatic acid ( <b>1</b> )                                 | S108        |
| 16. CD spectrum of synthetic and authentic (-)-plicatic acid ( <b>1</b> )                                                           | S108        |

**General Information.**  $^1\text{H}$  NMR spectra were recorded on a Varian Inova 400 (400 MHz) or Varian Inova 500 (500 MHz) spectrometers. Chemical shifts are reported in ppm down field from TMS, using TMS (0.00 ppm) or residual  $\text{CDCl}_3$  (7.26 ppm) as an internal standard. Data are reported as: (b = broad, s = singlet, d = doublet, t = triplet, q = quartet, m = multiplet; coupling constant in Hz, integration).  $^{13}\text{C}$  NMR spectra were recorded on a Varian Inova 400 (100 MHz) or Varian Inova 500 (125 MHz) spectrometers, using proton decoupling unless otherwise noted. Chemical shifts are reported in ppm down field from TMS, using the central resonance of  $\text{CDCl}_3$  (77.00 ppm) or  $\text{CD}_3\text{OD}$  (49.00 ppm) as the internal standard. Infrared spectra were recorded on a Perkin Elmer FT-IR spectrometer and are reported in frequency of absorption. Mass spectrometry was performed by Mass Spectrometry Laboratory, University of Illinois at Urbana-Champaign. Optical rotations were measured on a Jasco Digital Polarimeter with a sodium lamp. CD spectra were recorded on Jasco J-810 circular dichroism spectrometer.

**Materials.** Unless otherwise noted, reagents and solvents were commercially available and used without further purification. Anhydrous DMF was obtained by distillation from calcium hydride. Anhydrous THF was obtained by distillation from sodium metal (benzophenone indicator).

### General Procedure for the Preparation of **3**<sup>1</sup>

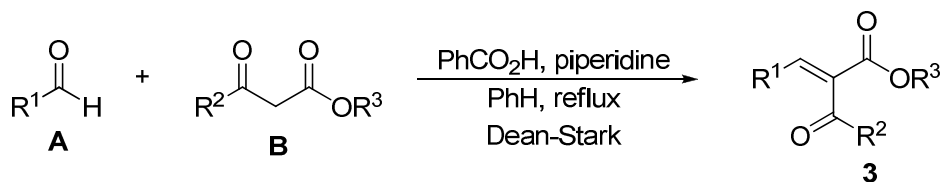

The mixture of aldehyde **A** (11.0 mmol equiv.), 1,3-dicarbonyl compound **B** (10.0 mmol), benzoic acid (1.0 mmol), and piperidine (1.0 mmol) in benzene (50.0 mL) was heated at reflux in a round bottom flask connected to a Dean-Stark apparatus until the starting materials were consumed as indicated by TLC analysis. After being cooled down to room temperature, the reaction mixture was concentrated under reduced pressure. The residue was purified by silica gel chromatography to afford (*E*)-**3** in 40-60% yield. The stereochemistry of **3c-g** was assigned based on the  $^3J_{\text{C-H}}$  coupling constants of  $\text{C}_{\text{ketone-H}}$  and  $\text{C}_{\text{ester-H}}$ .<sup>2</sup>

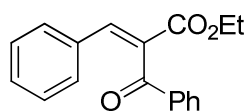

### (*E*)-Ethyl 2-benzoyl-3-phenylacrylate (**3b**)<sup>3</sup>

<sup>1</sup> Allen, C. F. H.; Spangler, F. W. *Org. Syn.* **1955**, *Coll. Vol. 3*, 377.

<sup>2</sup> Kingsbury, C. A.; Draney, D.; Sopchik, A.; Rissler, W.; Durham, D. *J. Org. Chem.* **1978**, *41*, 3863.

<sup>3</sup> Li, Z.; Li, H.; Guo, X.; Cao, L.; Yu, R.; Li, H.; Pan, S. *Org. Lett.* **2008**, *10*, 803.

**<sup>1</sup>H NMR** (400 MHz, CDCl<sub>3</sub>) δ 7.93 (d, *J* = 6.8 Hz, 2H), 7.56-7.20 (m, 9H), 4.20 (q, *J* = 7.2 Hz, 2H), 1.15 (t, *J* = 7.2 Hz, 3H); **<sup>13</sup>C NMR** (100 MHz, CDCl<sub>3</sub>) δ 195.66, 164.99, 142.60, 136.09, 133.87, 132.78, 131.24, 130.35, 130.17, 129.12, 128.80, 128.76, 61.54, 14.00; **IR** (thin film) 3061, 2980, 1720, 1702, 1674, 1624, 1597, 1449, 1253, 1231, 1198, 1092 cm<sup>-1</sup>; **LRMS (ESI)**: 303 (M + Na<sup>+</sup>); **HRMS (ESI)**: Exact mass calcd for C<sub>18</sub>H<sub>16</sub>O<sub>3</sub>Na (M + Na), 303.0997. Found 303.0997.

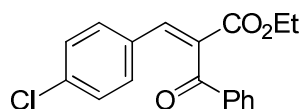

**(E)-Ethyl 2-benzoyl-3-(4-chlorophenyl)acrylate (3c)**

**<sup>1</sup>H NMR** (400 MHz, CDCl<sub>3</sub>) δ 7.94-7.90 (m, 2H), 7.59-7.20 (m, 7H), 4.22 (q, *J* = 7.2 Hz, 2H), 1.17 (t, *J* = 7.2 Hz, 3H); **<sup>13</sup>C NMR** (100 MHz, CDCl<sub>3</sub>) δ 195.38, 164.76, 141.04, 136.44, 135.90, 134.09, 131.84, 131.30, 129.09, 128.90, 61.68, 14.00; **IR** (thin film) 3061, 2981, 1720, 1673, 1624, 1592, 1492, 1252, 1093, 1013 cm<sup>-1</sup>; **LRMS (ESI)**: 315 (M + H<sup>+</sup>); **HRMS (ESI)**: Exact mass calcd for C<sub>18</sub>H<sub>16</sub>ClO<sub>3</sub> (M + H), 315.0788. Found 315.0794. <sup>3</sup>*J*<sub>C-H</sub> = 9.9 Hz for C<sub>ketone</sub>-H, <sup>3</sup>*J*<sub>C-H</sub> = 7.6 Hz for C<sub>ester</sub>-H.

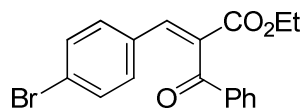

**(E)-Ethyl 2-benzoyl-3-(4-bromophenyl)acrylate (3d)**

**<sup>1</sup>H NMR** (400 MHz, CDCl<sub>3</sub>) δ 7.93 (d, *J* = 7.2 Hz, 2H), 7.88 (s, 1H), 7.58-7.41 (m, 3H), 7.36 (d, *J* = 7.2 Hz, 2H), 7.21 (d, *J* = 7.6 Hz, 2H), 4.22 (q, *J* = 7.2 Hz, 2H), 1.16 (t, *J* = 7.2 Hz, 3H); **<sup>13</sup>C NMR** (100 MHz, CDCl<sub>3</sub>) δ 195.24, 164.65, 140.99, 135.78, 134.03, 131.95, 131.92, 131.62, 131.38, 128.99, 128.82, 124.81, 61.59, 13.91; **IR** (thin film) 2978, 2366, 2346, 1720, 1707, 1702, 1672, 1250, 1230, 1196, 1073, 1010, 818 cm<sup>-1</sup>; **LRMS (ESI)**: 359, 361 (M + H<sup>+</sup>); **HRMS (ESI)**: Exact mass calcd for C<sub>18</sub>H<sub>16</sub>BrO<sub>3</sub> (M + H), 359.0283. Found 359.0280. <sup>3</sup>*J*<sub>C-H</sub> = 9.9 Hz for C<sub>ketone</sub>-H, <sup>3</sup>*J*<sub>C-H</sub> = 7.6 Hz for C<sub>ester</sub>-H.

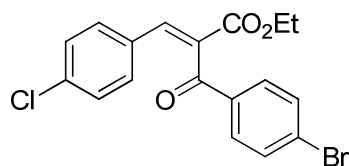

**(E)-Ethyl 2-(4-bromobenzoyl)-3-(4-chlorophenyl)acrylate (3e)**

**<sup>1</sup>H NMR** (400 MHz, CDCl<sub>3</sub>) δ 7.91 (s, 1H), 7.80 (d, *J* = 8.0 Hz, 2H), 7.57 (d, *J* = 8.4 Hz, 2H), 7.27 (d, *J* = 8.4 Hz, 2H), 7.21 (d, *J* = 8.4 Hz, 2H), 4.23 (q, *J* = 7.2 Hz, 2H), 1.18 (t, *J* = 7.2 Hz, 3H); **<sup>13</sup>C NMR** (100 MHz, CDCl<sub>3</sub>) δ 194.17, 164.34, 141.21, 136.48, 134.51, 132.15, 131.14, 131.11, 130.94, 130.97, 129.36,

129.02, 61.63, 13.90; **IR** (thin film) 2980, 2361, 2345, 1720, 1702, 1672, 1584, 1252, 1195, 1011  $\text{cm}^{-1}$ ; **LRMS (ESI)**: 393 ( $\text{M} + \text{H}^+$ ); **HRMS (ESI)**: Exact mass calcd for  $\text{C}_{18}\text{H}_{15}\text{ClBrO}_3$  ( $\text{M} + \text{H}$ ), 392.9893. Found 392.9898.  $^3J_{\text{C-H}} = 9.9$  Hz for  $\text{C}_{\text{ketone-H}}$ ,  $^3J_{\text{C-H}} = 7.7$  Hz for  $\text{C}_{\text{ester-H}}$ .

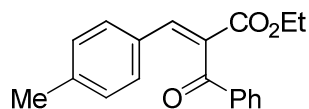

**(E)-Ethyl 2-benzoyl-3-p-tolylacrylate (3f)**

**$^1\text{H}$  NMR** (400 MHz,  $\text{CDCl}_3$ )  $\delta$  7.94 (d,  $J = 8.0$  Hz, 2H), 7.54 (t,  $J = 7.2$  Hz, 1H), 7.41 (t,  $J = 7.6$  Hz, 2H), 7.23 (d,  $J = 8.0$  Hz, 2H), 7.02 (d,  $J = 8.0$  Hz, 2H), 4.19 (q,  $J = 7.2$  Hz, 2H), 2.25 (s, 3H), 1.15 (t,  $J = 7.2$  Hz, 3H);  **$^{13}\text{C}$  NMR** (100 MHz,  $\text{CDCl}_3$ )  $\delta$  196.16, 165.36, 142.82, 141.19, 136.42, 134.06, 130.53, 130.35, 130.24, 129.78, 129.35, 129.04, 61.64, 21.60, 14.26; **IR** (thin film) 2961, 2930, 2870, 2362, 2345, 1719, 1702, 1676, 1253, 1230, 1200, 1183, 1085  $\text{cm}^{-1}$ ; **LRMS (ESI)**: 295 ( $\text{M} + \text{H}^+$ ); **HRMS (ESI)**: Exact mass calcd for  $\text{C}_{19}\text{H}_{19}\text{O}_3$  ( $\text{M} + \text{H}$ ), 295.1334. Found 295.1324.  $^3J_{\text{C-H}} = 9.8$  Hz for  $\text{C}_{\text{ketone-H}}$ ,  $^3J_{\text{C-H}} = 7.6$  Hz for  $\text{C}_{\text{ester-H}}$ .

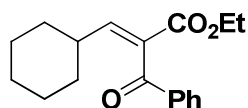

**(E)-Ethyl 2-benzoyl-3-cyclohexylacrylate (3g)**

**$^1\text{H}$  NMR** (400 MHz,  $\text{CDCl}_3$ )  $\delta$  7.90 (d,  $J = 7.6$  Hz, 2H), 7.61-7.44 (m, 3H), 6.90 (d,  $J = 10.8$  Hz, 1H), 4.14 (q,  $J = 7.2$  Hz, 2H), 2.12 (m, 1H), 1.67-1.01 (m, 13H);  **$^{13}\text{C}$  NMR** (100 MHz,  $\text{CDCl}_3$ )  $\delta$  194.49, 164.79, 152.80, 136.91, 133.54, 131.72, 128.98, 128.59, 61.03, 38.55, 31.60 (2), 25.47, 24.90 (2), 13.90; **IR** (thin film) 2929, 2853, 1724, 1675, 1639, 1597, 1449, 1252, 1233, 1221  $\text{cm}^{-1}$ ; **LRMS (ESI)**: 287 ( $\text{M} + \text{H}^+$ , 100); **HRMS (ESI)**: Exact mass calcd for  $\text{C}_{18}\text{H}_{23}\text{O}_3$  ( $\text{M} + \text{H}$ ), 287.1647. Found 287.1635.  $^3J_{\text{C-H}} = 9.8$  Hz for  $\text{C}_{\text{ketone-H}}$ ,  $^3J_{\text{C-H}} = 7.6$  Hz for  $\text{C}_{\text{ester-H}}$ .

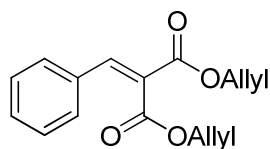

**Diallyl 2-benzylidenemalonate (3h)**

**$^1\text{H}$  NMR** (400 MHz,  $\text{CDCl}_3$ )  $\delta$  7.79 (s, 1H), 7.47-7.35 (m, 5H), 6.01-5.86 (m, 2H), 5.39-5.24 (m, 4H), 4.78-4.74 (m, 4H);  **$^{13}\text{C}$  NMR** (100 MHz,  $\text{CDCl}_3$ )  $\delta$  166.21, 163.28, 142.96, 132.69, 131.55, 131.15, 130.69, 129.53, 128.80, 125.60, 119.33, 118.43, 66.28, 66.04; **IR** (thin film) 2980, 2962, 2363, 1730, 1629, 1257, 1198  $\text{cm}^{-1}$ ; **LRMS (ESI)**: 295 ( $\text{M} + \text{Na}^+$ , 100); **HRMS (ESI)**: Exact mass calcd for  $\text{C}_{16}\text{H}_{16}\text{O}_4\text{Na}$  ( $\text{M} + \text{Na}$ ), 295.0946. Found 295.0944.

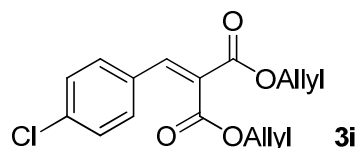

### Diallyl 2-(4-chlorobenzylidene)malonate (**3i**)

<sup>1</sup>H NMR (400 MHz, CDCl<sub>3</sub>) δ 7.72 (s, 1H), 7.41-7.34 (m, 4H), 6.00-5.86 (m, 2H), 5.39-5.26 (m, 4H), 4.78-4.75 (m, 4H); <sup>13</sup>C NMR (100 MHz, CDCl<sub>3</sub>) δ 165.91, 163.43, 141.41, 136.76, 131.42, 131.12, 131.00, 130.73, 129.10, 126.10, 119.55, 118.53, 66.36, 66.12; IR (thin film) 3086, 3021, 2947, 1734, 1648, 1630, 1591, 1492, 1385, 1254, 1197, 1093, 1060 cm<sup>-1</sup>; LRMS (ESI): 329 (M + Na<sup>+</sup>); HRMS (ESI): Exact mass calcd for C<sub>16</sub>H<sub>15</sub>ClO<sub>4</sub>Na (M + Na), 329.0557. Found 329.0550.

### General Procedure for Base Screening

The base (0.010 mmol) was added to a stirring mixture of (+)-(*S*, *S*)-TADOOH (0.12 mmol) and **3b** (0.10 mmol) in THF (0.50 mL) via a syringe at 0 °C under air. After 36 hours, the reaction mixture was allowed to pass rapidly through a plug (20 mm) of silica gel. The silica gel plug was washed with ethyl acetate (10 mL). The filtrate was concentrated under reduced pressure. The residue was subjected to <sup>1</sup>H NMR and HPLC analysis to determine the conversion. The ee of **4b** was determined by HPLC analysis [Chiralcel AD-H column, Hexanes/*i*-PrOH = 98/2, 1.0 mL/min, 254 nm, 15 °C, *t*<sub>R</sub> (1) ≈ 22 min, *t*<sub>R</sub> (2) ≈ 33 min]. The results were listed in Table 1.

**Table 1.** Base Screening

| Entry | Base (10 mol %)                              | conv. (% , HPLC) | ee (%) | Major peak<br><i>t</i> <sub>R</sub> (2) |
|-------|----------------------------------------------|------------------|--------|-----------------------------------------|
| 1     | LiOH (5.0 M, aq.)                            | 99               | 92     | <i>t</i> <sub>R</sub> (2)               |
| 2     | Li <sub>2</sub> CO <sub>3</sub> (5.0 M, aq.) | trace            | /      | /                                       |
| 3     | NaOH (5.0 M, aq.)                            | 12               | 44     | <i>t</i> <sub>R</sub> (1)               |
| 4     | Na <sub>2</sub> CO <sub>3</sub> (5.0 M, aq.) | trace            | /      | /                                       |
| 5     | KOH (5.0 M, aq.)<br>(indissolvable)          | trace            | /      | /                                       |
| 6     | K <sub>2</sub> CO <sub>3</sub> (5.0 M, aq.)  | 21               | 73     | <i>t</i> <sub>R</sub> (2)               |
| 7     | CsOH (5.0 M, aq.)                            | 94               | 24     | <i>t</i> <sub>R</sub> (1)               |
| 8     | Cs <sub>2</sub> CO <sub>3</sub> (5.0 M, aq.) | 92               | 30     | <i>t</i> <sub>R</sub> (1)               |
| 9     | DBU                                          | 35               | 42     | <i>t</i> <sub>R</sub> (2)               |
| 10    | DABCO                                        | 4                | /      | /                                       |
| 11    | Et <sub>3</sub> N                            | 4                | /      | /                                       |

### General Procedure for Solvent Screening

An aqueous solution of LiOH (0.010 mmol, 2.0  $\mu$ L, 5.0 M) was added via a syringe at 0 °C to a stirring solution of (+)-TADOOH (0.12 mmol) and **3b** (0.10 mmol) in a solvent (0.50 mL) specified in Table 2 under air. The resulting reaction mixture was stirred for 36 hr, after which the reaction mixture was allowed to pass rapidly through a plug (20 mm) of silica gel. The silica gel was washed with ethyl acetate (10 mL). The filtrate was concentrated under reduced pressure. The residue was subjected to <sup>1</sup>H NMR and HPLC analysis to determine the conversion. The ee of **4b** was determined by HPLC analysis [Chiralcel AD-H column, Hexanes/*i*-PrOH = 98/2, 1.0 mL/min, 254 nm, 15 °C,  $t_R$  (1)  $\approx$  22 min,  $t_R$  (2)  $\approx$  33 min]. The results were listed in Table 2.

**Table 2.** Solvent Screening

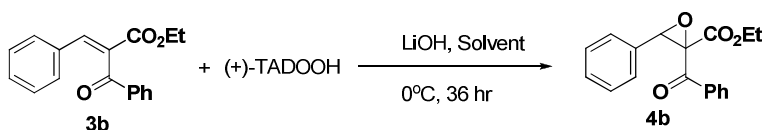

| Entry | Solvent (0.20 M)  | conv. (% , HPLC) | ee (%) | Major peak |
|-------|-------------------|------------------|--------|------------|
| 1     | THF               | 99               | 92     | $t_R$ (2)  |
| 2     | Et <sub>2</sub> O | 77               | 80     | $t_R$ (2)  |
| 3     | DCM               | 12               | 45     | $t_R$ (1)  |
| 4     | Toluene (slurry)  | 35               | 39     | $t_R$ (2)  |
| 5     | EtOH              | 4                | /      | $t_R$ (1)  |
| 6     | EtOAc             | 50               | 93     | $t_R$ (2)  |
| 7     | DMF (slurry)      | 43               | 32     | $t_R$ (2)  |

### General Procedure for the Asymmetric Epoxidation of 3

An aqueous solution of LiOH (0.010 mmol, 2.0  $\mu$ L, 5.0 M) was added via a syringe to a solution of (+)-TADOOH (0.12 mmol) and **3** (0.10 mmol) in THF (0.50 mL) at 0 °C (or indicated temperature), under air. The reaction mixture was stirred vigorously at this temperature for indicated time. After the reaction was complete as indicated by TLC analysis, the reaction mixture was allowed to pass rapidly through a plug (20 mm) of silica gel. The silica gel was washed with ethyl acetate (10 mL). The filtrate was concentrated under reduced pressure and the residue was purified by flash chromatography or preparative TLC to give pure epoxide **4**.

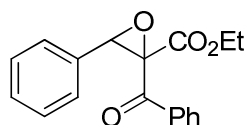**(-)-Ethyl 2-benzoyl-3-phenyloxirane-2-carboxylate (4b)**

0 °C, 1.5 days, 98% yield, 92% ee.

<sup>1</sup>H NMR (400 MHz, CDCl<sub>3</sub>) δ 7.85 (d, *J* = 8.0 Hz, 2H), 7.52 (t, *J* = 7.2 Hz, 1H), 7.38 (t, *J* = 8.0 Hz, 2H), 7.19 (s, 5H), 4.73 (s, 1H), 4.24 (q, *J* = 6.8 Hz, 2H), 1.17 (t, *J* = 6.8 Hz, 3H); <sup>13</sup>C NMR (100 MHz, CDCl<sub>3</sub>) δ 189.81, 166.40, 135.15, 133.81, 132.04, 128.87, 128.70, 128.45, 128.27, 126.21, 65.80, 62.97, 62.74, 13.73; IR (thin film) 2925, 2853, 2360, 2342, 1748, 1730, 1693, 1450, 1256, 1235, 696 cm<sup>-1</sup>; LRMS (ESI): 319 (M + Na<sup>+</sup>); HRMS (ESI): Exact mass calcd for C<sub>18</sub>H<sub>16</sub>O<sub>4</sub>Na (M + Na), 319.0946. Found 319.0933; [α]<sub>D</sub><sup>25</sup> = -15.3° (*c* 1.0, CHCl<sub>3</sub>, 92% ee), 92% ee was determined by HPLC analysis [Chiralcel OD-H column, Hexanes/*i*-PrOH = 96/4, 1.0 mL/min, 220 nm, 20 °C, *t*<sub>R</sub>(1) = 11.3 min (major), *t*<sub>R</sub>(2) = 20.6 min (minor)].

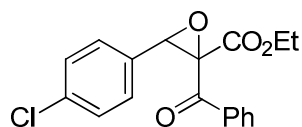**(+)-Ethyl 2-benzoyl-3-(4-chlorophenyl)oxirane-2-carboxylate (4c)**

0 °C, 2 days, 99% yield, 94% ee.

<sup>1</sup>H NMR (400 MHz, CDCl<sub>3</sub>) δ 7.85 (d, *J* = 7.2 Hz, 2H), 7.56 (t, *J* = 7.2 Hz, 1H), 7.42 (t, *J* = 7.6 Hz, 2H), 7.19 (d, *J* = 8.8 Hz, 2H), 7.14 (d, *J* = 8.8 Hz, 2H), 4.70 (s, 1H), 4.26 (q, *J* = 6.8 Hz, 2H), 1.18 (t, *J* = 6.8 Hz, 3H); <sup>13</sup>C NMR (100 MHz, CDCl<sub>3</sub>) δ 189.62, 166.24, 135.05, 134.91, 134.11, 130.73, 128.79, 128.67, 128.65, 127.66, 65.80, 62.96, 62.36, 13.80; IR (thin film) 2360, 2334, 1748, 1733, 1691, 1256, 1234 cm<sup>-1</sup>; LRMS (ESI): 353 (M + Na<sup>+</sup>, 100); HRMS (ESI): Exact mass calcd for C<sub>18</sub>H<sub>15</sub>ClO<sub>4</sub>Na (M + Na), 353.0557. Found 353.0554; [α]<sub>D</sub><sup>25</sup> = +0.8° (*c* 1.0, CHCl<sub>3</sub>, 94% ee), 94% ee was determined by HPLC analysis [Chiralcel OD-H column, Hexanes/*i*-PrOH = 90/10, 1.0 mL/min, 220 nm, 20 °C, *t*<sub>R</sub>(1) = 9.5 min (major), *t*<sub>R</sub>(2) = 15.7 min (minor)].

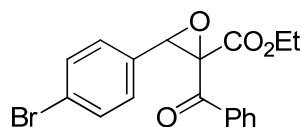**(+)-Ethyl 2-benzoyl-3-(4-bromophenyl)oxirane-2-carboxylate (4d)**

0 °C, 2 days, 83% yield, 93% ee.

**<sup>1</sup>H NMR** (400 MHz, CDCl<sub>3</sub>) δ 7.85 (d, *J* = 8.0 Hz, 2H), 7.56 (t, *J* = 7.6 Hz, 1H), 7.42 (t, *J* = 7.6 Hz, 2H), 7.34 (d, *J* = 8.0 Hz, 2H), 7.07 (d, *J* = 7.6 Hz, 2H), 4.68 (s, 1H), 4.26 (q, *J* = 7.6 Hz, 2H), 1.18 (t, *J* = 7.2 Hz, 3H); **<sup>13</sup>C NMR** (100 MHz, CDCl<sub>3</sub>) δ 189.61, 166.21, 135.02, 134.13, 131.59, 131.23, 128.78, 128.65, 127.92, 123.16, 65.75, 62.97, 62.40, 13.80; **IR** (thin film) 2982, 1748, 1734, 1690, 1596, 1490, 1256, 1233 cm<sup>-1</sup>; **LRMS (ESI)**: 397, 399 (M + Na<sup>+</sup>); **HRMS (ESI)**: Exact mass calcd for C<sub>18</sub>H<sub>15</sub>BrO<sub>4</sub>Na (M + Na), 397.0051. Found 397.0056; [α]<sub>D</sub><sup>25</sup> = +5.4° (c 1.0, CHCl<sub>3</sub>, 93% ee), 93% ee was determined by HPLC analysis [Chiralcel OD-H column, Hexanes/*i*-PrOH = 90/10, 0.8 mL/min, 220 nm, 20 °C, *t*<sub>R</sub> (1) = 11.2 min (major), *t*<sub>R</sub> (2) = 18.6 min (minor)].

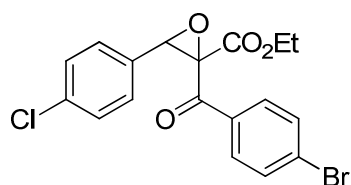

**(+)-Ethyl 2-(4-bromobenzoyl)-3-(4-chlorophenyl)oxirane-2-carboxylate (4e)**

0 °C, 2 days, 99% yield, 93% ee.

**<sup>1</sup>H NMR** (400 MHz, CDCl<sub>3</sub>) δ 7.72 (d, *J* = 8.4 Hz, 2H), 7.57 (t, *J* = 8.4 Hz, 1H), 7.21 (t, *J* = 8.4 Hz, 2H), 7.11 (d, *J* = 8.4 Hz, 2H), 4.68 (s, 1H), 4.27 (q, *J* = 7.2 Hz, 2H), 1.21 (t, *J* = 7.2 Hz, 3H); **<sup>13</sup>C NMR** (100 MHz, CDCl<sub>3</sub>) δ 188.79, 166.00, 135.09, 133.77, 132.09, 130.51, 130.23, 129.61, 128.79, 127.56, 65.62, 63.12, 62.37, 13.87; **IR** (thin film) 2984, 2933, 2360, 2341, 1749, 1734, 1691, 1584, 1494, 1398, 1257, 1236, 1012, 832 cm<sup>-1</sup>; **LRMS (ESI)**: 431, 433 (M + Na<sup>+</sup>); **HRMS (ESI)**: Exact mass calcd for C<sub>18</sub>H<sub>14</sub>ClBrO<sub>4</sub>Na (M + Na), 430.9662. Found 430.9670; [α]<sub>D</sub><sup>25</sup> = +25.0° (c 1.0, CHCl<sub>3</sub>, 93% ee), 93% ee was determined by HPLC analysis [Chiralcel OD-H column, Hexanes/*i*-PrOH = 96/4, 0.8 mL/min, 220 nm, 20 °C, *t*<sub>R</sub> (1) = 19.2 min (major), *t*<sub>R</sub> (2) = 42.7 min (minor)].

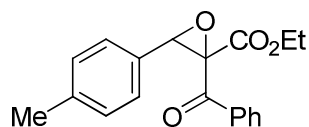

**(+)-Ethyl 2-benzoyl-3-p-tolyloxirane-2-carboxylate (4f)**

0 °C, 2 days, 60% yield, 96% ee.

**<sup>1</sup>H NMR** (400 MHz, CDCl<sub>3</sub>) δ 7.86 (d, *J* = 7.6 Hz, 2H), 7.53 (t, *J* = 7.6 Hz, 1H), 7.40 (t, *J* = 7.6 Hz, 2H), 7.08 (d, *J* = 8.0 Hz, 2H), 7.00 (d, *J* = 8.0 Hz, 2H), 4.69 (s, 1H), 4.24 (q, *J* = 7.6 Hz, 2H), 2.22 (s, 3H), 1.17 (t, *J* = 7.6 Hz, 3H); **<sup>13</sup>C NMR** (100 MHz, CDCl<sub>3</sub>) δ 189.99, 166.51, 138.80, 135.26, 133.80, 129.04, 129.02, 128.76, 128.48, 126.18, 65.86, 63.16, 62.72, 21.10, 13.76; **IR** (thin film) 2983, 1746, 1730, 1601, 1450, 1256, 1233, 1177 cm<sup>-1</sup>; **LRMS (ESI)**: 311 (M + H<sup>+</sup>); **HRMS (ESI)**: Exact mass calcd for C<sub>19</sub>H<sub>19</sub>O<sub>4</sub>



(M + H), 311.1283. Found 311.1278;  $[\alpha]_D^{25} = +0.7^\circ$  (*c* 1.0, CHCl<sub>3</sub>, 96% ee), 96% ee was determined by HPLC analysis [Chiralcel OD-H column, Hexanes/*i*-PrOH = 90/10, 0.8 mL/min, 220 nm, 20 °C,  $t_R$  (1) = 10.0 min (major),  $t_R$  (2) = 12.9 min (minor)].

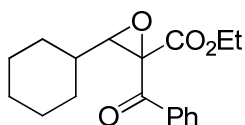

**(+)-Ethyl 2-benzoyl-3-cyclohexyloxirane-2-carboxylate (4g)**

-40 °C, 3 days, 86% yield, 86% ee.

**<sup>1</sup>H NMR** (400 MHz, CDCl<sub>3</sub>)  $\delta$  8.04 (d, *J* = 8.0 Hz, 2H), 7.61 (t, *J* = 7.6 Hz, 1H), 7.49 (t, *J* = 8.0 Hz, 2H), 4.22 (q, *J* = 7.2 Hz, 2H), 3.34 (d, *J* = 8.8 Hz, 1H), 1.87 (d, *J* = 7.6 Hz, 2H), 1.69-0.97 (m, 12H); **<sup>13</sup>C NMR** (100 MHz, CDCl<sub>3</sub>)  $\delta$  190.94, 167.50, 135.06, 134.02, 129.23, 128.62, 67.06, 63.69, 62.55, 38.04, 30.16, 28.00, 25.93, 25.03, 24.97, 13.81; **IR** (thin film) 2976, 2931, 2854, 2360, 2338, 1749, 1730, 1691, 1450, 1285, 1256, 1233, 698 cm<sup>-1</sup>; **LRMS (ESI)**: 303 (M + H<sup>+</sup>); **HRMS (ESI)**: Exact mass calcd for C<sub>18</sub>H<sub>23</sub>O<sub>4</sub> (M + H), 303.1596. Found 303.1585;  $[\alpha]_D^{25} = +7.4^\circ$  (*c* 1.0, CHCl<sub>3</sub>, 86% ee), 86% ee was determined by HPLC analysis [Chiralcel As-H + Chiralpak AD + Chiralcel AD-H column, Hexanes/*i*-PrOH = 99/1, 0.8 mL/min, 254 nm, 20 °C,  $t_R$  (1) = 50.2 min (major),  $t_R$  (2) = 54.65 min (minor)].

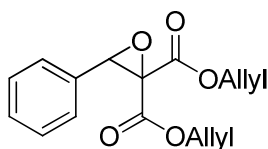

**(-)-Diallyl 3-phenyloxirane-2,2-dicarboxylate (4h)**

0 °C, 3 days, 90% yield, 92% ee.

**<sup>1</sup>H NMR** (400 MHz, CDCl<sub>3</sub>)  $\delta$  7.33 (s, 5H), 5.98-5.88 (m, 1H), 5.60-5.50 (m, 1H), 5.38 (dd, *J* = 16.8, 1.2 Hz, 1H), 5.30 (d, *J* = 10.4 Hz, 1H), 5.08 (dd, *J* = 14.8, 2.8 Hz, 2H), 4.76-4.74 (m, 2H), 4.59 (s, 1H), 4.45 (d, *J* = 5.6 Hz, 2H); **<sup>13</sup>C NMR** (100 MHz, CDCl<sub>3</sub>)  $\delta$  165.04, 163.13, 131.83, 130.69, 129.11, 128.38, 126.18, 119.41, 119.05, 67.10, 66.24, 63.12, 62.21; **IR** (thin film) 3028, 2918, 1753, 1750, 1650, 1455, 1264, 1227, 1122, 1045, 936, 754 cm<sup>-1</sup>; **LRMS (ESI)**: 311 (M + Na<sup>+</sup>); **HRMS (ESI)**: Exact mass calcd for C<sub>16</sub>H<sub>16</sub>O<sub>5</sub>Na (M + Na), 311.0895. Found 311.0894;  $[\alpha]_D^{25} = -57.2^\circ$  (*c* 1.0, CHCl<sub>3</sub>, 92% ee), 92% ee was determined by HPLC analysis [Chiralcel OD-H column, Hexanes/*i*-PrOH = 96/4, 1 mL/min, 254 nm, 20 °C,  $t_R$  (1) = 11.2 min (minor),  $t_R$  (2) = 12.3 min (major)].

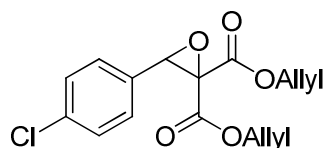

**(-)-Diallyl 3-(4-chlorophenyl)oxirane-2,2-dicarboxylate (4i)**

-20 °C, 3 days, 70% yield, 84% ee.

**<sup>1</sup>H NMR** (400 MHz, CDCl<sub>3</sub>) δ 7.32 (d, *J* = 8.8 Hz, 2H), 7.28 (d, *J* = 8.4 Hz, 2H), 5.98-5.88 (m, 1H), 5.65-5.55 (m, 1H), 5.39 (d, *J* = 17.2 Hz, 1H), 5.30 (d, *J* = 10.4 Hz, 1H), 5.13 (d, *J* = 11.6 Hz, 2H), 4.80-4.71 (m, 2H); 4.56 (s, 1H), 4.48 (d, *J* = 6.0 Hz, 2H); **<sup>13</sup>C NMR** (100 MHz, CDCl<sub>3</sub>) δ 164.78, 162.92, 135.16, 130.63, 130.57, 130.40, 128.67, 127.65, 119.53, 119.35, 67.19, 66.39, 63.03, 61.54; **IR** (thin film) 2362, 2338, 1751, 1270, 1225 cm<sup>-1</sup>; **LRMS (ESI)**: 345 (M + Na)<sup>+</sup>; **HRMS (ESI)**: Exact mass calcd for C<sub>16</sub>H<sub>15</sub>ClO<sub>5</sub>Na (M + Na), 345.0506. Found 345.0497; [α]<sub>D</sub><sup>25</sup> = -62.7° (*c* 1.0, CHCl<sub>3</sub>, 84% ee.), 84% ee was determined by HPLC analysis [Chiralcel OD-H column, Hexanes/*i*-PrOH = 99/1, 0.8 mL/min, 254 nm, 20 °C, *t<sub>R</sub>* (1) = 13.5 min (major), *t<sub>R</sub>* (2) = 16.8 min (minor)].

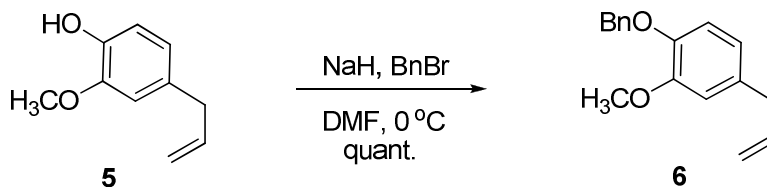

To a suspension of NaH (55% assay, 1.05 g, 24.0 mmol) in anhydrous DMF (20.0 mL) at 0 °C was added dropwise a solution of eugenol (**5**) (3.28 g, 20.0 mmol) in anhydrous DMF (10.0 mL) via syringe over 15 min. The resulting deep green mixture was stirred at 0 °C for 15 min, and then to this solution was added dropwise a solution of benzylbromide (2.85 mL, 24.0 mmol) in anhydrous DMF (10.0 mL) via syringe over 2 min. The resulting mixture was stirred at 0 °C for 1 hr. Then the reaction was quenched by a slow addition of saturated aqueous NH<sub>4</sub>Cl (50 mL) and then ethyl acetate (50 mL). The organic layer was collected, and the aqueous layer was extracted with ethyl acetate (3×50 mL). The combined extracts were washed with water (4×50 mL), brine (40 mL), dried over Na<sub>2</sub>SO<sub>4</sub> and concentrated under reduced pressure. The residue was subjected to silica gel chromatography (petroleum ether/EtOAc = 8/1) to give **6** (5.07 g, quant.) as a colorless oil.

**<sup>1</sup>H NMR** (400MHz, CDCl<sub>3</sub>) δ 7.43 (d, *J* = 7.2 Hz, 2H), 7.35 (t, *J* = 7.2 Hz, 2H), 7.28 (t, *J* = 7.2 Hz, 1H), 6.80 (d, *J* = 8.0 Hz, 1H), 6.72 (s, 1H), 6.65 (d, *J* = 8.0 Hz, 1H), 5.93 (m, 1H), 5.12 (s, 2H), 5.07 (d, *J* = 11.6 Hz, 1H), 5.04 (d, *J* = 2.8 Hz, 1H), 3.86 (s, 3H), 3.31 (d, *J* = 7.2 Hz, 2H);

**IR** (thin film) 3064, 3034, 3003, 2976, 2935, 2907, 2874, 2833, 1638, 1606, 1591, 1514, 1506, 1464, 1454, 1418, 1335, 1260, 1230, 1156, 1140, 1034, 914, 850, 806, 739, 697, 654, 597  $\text{cm}^{-1}$ ; **LRMS (ESI)**: 277.1 ( $\text{M} + \text{Na}$ )<sup>+</sup>; **HRMS (ESI)**: Exact mass calcd for  $\text{C}_{17}\text{H}_{18}\text{O}_2\text{Na}$  ( $\text{M} + \text{Na}$ ), 277.1204. Found 277.1196.

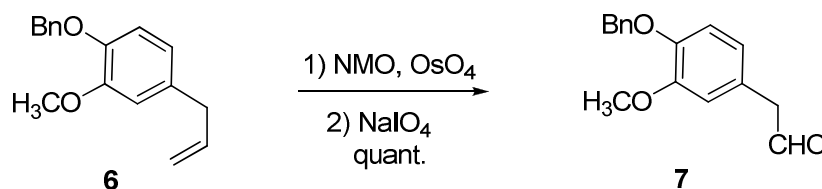

To a solution of **6** (508 mg, 2.0 mmol) in *t*-BuOH/ $\text{H}_2\text{O}$ /THF (2/1/4) (7.0 mL) was added a solution of  $\text{OsO}_4$  in *t*-BuOH (0.20 M, 0.50 mL, 0.010 mmol, 5 mol %) at 10 °C. To the resulting mixture, *N*-methylmorpholine *N*-oxide (NMO) (357 mg, 3.0 mmol) was added in one portion. The resulting reaction mixture was stirred at 10 °C for 15 min and then warmed to room temperature. The stirring was continued for another 1 hr before the reaction was quenched with addition of sat.  $\text{NaHSO}_3$ . The resulting mixture was stirred at room temperature overnight. The mixture was diluted with ethyl acetate (30 mL), and then washed with sat.  $\text{NaHSO}_3$  (15 mL). The aqueous layer was extracted with ethyl acetate (2×20 mL). The organic phase was collected and washed with brine (20 mL), dried over  $\text{Na}_2\text{SO}_4$  and concentrated under reduced pressure. The residue was dissolved in  $\text{CH}_2\text{Cl}_2$  (5.0 mL), and the resulting solution was added into a solution of  $\text{NaIO}_4$  (630 mg, 3.0 mmol) in water (5.0 mL) at 0 °C. The resulting light yellow mixture was stirred at 0 °C for 40 min and then quenched with saturated aqueous  $\text{NaHSO}_3$ . The resulting mixture was stirred at room temperature for 30 min, and then extracted with ethyl acetate (3×20 mL). The organic phase was collected, washed with brine (20 mL), dried over  $\text{Na}_2\text{SO}_4$  and concentrated under reduced pressure. The residue was subjected silica gel chromatography (petroleum ether/EtOAc = 4/1) to give aldehyde **7** (507 mg, quant.) as a colorless oil.

**$^1\text{H}$  NMR** (400MHz,  $\text{CDCl}_3$ )  $\delta$  9.68 (t,  $J = 2.4$  Hz, 1H), 7.41 (d,  $J = 7.2$  Hz, 2H), 7.34 (t,  $J = 7.2$  Hz, 2H), 7.30 (t,  $J = 7.2$  Hz, 1H), 6.87 (d,  $J = 8.0$  Hz, 1H), 6.72 (s, 1H), 6.70 (d,  $J = 8.0$  Hz, 1H), 5.12 (s, 2H), 3.85 (s, 3H), 3.57 (d,  $J = 2.4$  Hz, 2H);  **$^{13}\text{C}$  NMR** (100 MHz,  $\text{CDCl}_3$ )  $\delta$  199.418, 149.965, 147.506, 136.987, 128.479, 127.796, 127.181, 124.669, 121.740, 114.401, 13.118, 71.012, 55.947, 50.073; **IR** (thin film) 3063, 3034, 3007, 2937, 2876, 2833, 2728, 1723, 1682, 1591, 1514, 1464, 1454, 1383, 1332, 1231, 1261, 1141, 1034, 854, 810, 741, 698  $\text{cm}^{-1}$ ;

**LRMS (ESI):** 279.1 (M + Na)<sup>+</sup>; **HRMS (ESI):** Exact mass calcd for C<sub>16</sub>H<sub>16</sub>O<sub>3</sub>Na (M + Na), 279.0997. Found 279.0990.

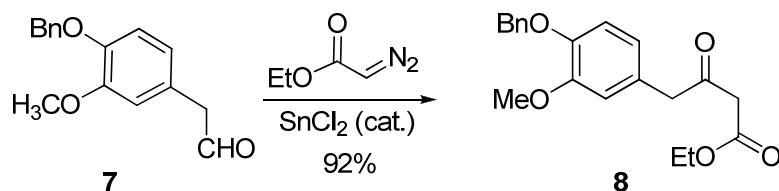

SnCl<sub>2</sub>·2H<sub>2</sub>O (45 mg, 2.0 mmol, 10 mol %) was suspended in anhydrous CH<sub>2</sub>Cl<sub>2</sub> (3.0 mL) at -72 °C. To this suspension, ethyl diazoacetate (0.23 mL, 2.2 mmol) was added dropwise via syringe. The resulting yellow mixture was stirred at this temperature for 10 min and warmed up to room temperature for another 15 min. The mixture was recooled to -72 °C and a solution of **7** (507 mg, 2.0 mmol) in CH<sub>2</sub>Cl<sub>2</sub> (5.0 mL) was introduced via syringe over 5 min. The resulting mixture was stirred while warming up to room temperature over 1 hr and stirred at room temperature overnight. The reaction was quenched with addition of aq. HCl (1.0 N, 2.0 mL) and extracted with ethyl acetate (3×25 mL). The combined extracted were washed with 5% aq. NaHCO<sub>3</sub> (3×15 mL), brine (20 mL), dried over Na<sub>2</sub>SO<sub>4</sub> and concentrated at reduced pressure. The residue was subjected to silica gel chromatography (petroleum ether/EtOAc = 8/1→4/1) to give β-keto ester **8** (640 mg, 92% yield) as a white solid.

<sup>1</sup>H NMR (400MHz, CDCl<sub>3</sub>) δ 7.40 (d, *J* = 7.2 Hz, 2H), 7.33 (dd, *J* = 7.6 Hz, 7.2 Hz, 2H), 7.27 (d, *J* = 7.6 Hz, 1H), 6.81 (d, *J* = 8.6 Hz, 1H), 6.71 (s, 1H), 6.65 (d, *J* = 8.6 Hz), 5.11 (s, 2H), 4.14 (q, *J* = 7.4 Hz, 2H), 3.85 (s, 3H), 3.71 (s, 2H), 3.41 (s, 2H), 1.22 (t, *J* = 7.4 Hz, 3H); <sup>13</sup>C NMR (100MHz, CDCl<sub>3</sub>) δ 200.722, 167.029, 149.654, 147.324, 136.910, 128.394, 127.696, 127.088, 126.056, 121.593, 113.980, 112.834, 70.821, 61.220, 55.815, 49.470, 47.914, 13.940; **IR** (thin film) 3064, 3033, 2982, 2938, 1745, 1716, 1606, 1591, 1515, 1464, 1454, 1421, 1385, 1368, 1317, 1262, 1232, 1142, 1032, 855, 805, 741, 698 cm<sup>-1</sup>; **LRMS (ESI):** 343.2 (M + H)<sup>+</sup>; **HRMS (ESI):** Exact mass calcd for C<sub>20</sub>H<sub>23</sub>O<sub>5</sub> (M + H), 343.1545. Found 343.1541.

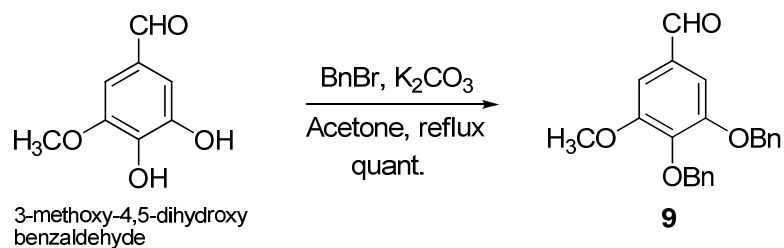

To a brown mixture slurry of 3-methoxy-4,5-dihydroxy-benzaldehyde (1.00 g, 6.0 mmol) and  $K_2CO_3$  (3.00 g, 21.7 mmol, 3.5 eq.) in acetone (20 mL) was added benzyl bromide (1.78 mL, 15.0 mmol, 2.5 eq.) at 0 °C. The corresponding yellow mixture was refluxed for 7 hr. The resulting green mixture was cooled down to 0 °C and quenched carefully with aq. HCl (1N, 35.0 mL). The mixture was diluted with ethyl acetate, washed with water (3×20 mL), saturated  $NaHCO_3$  (3×10 mL), brine (25 mL) and dried over  $Na_2SO_4$ . After concentration at reduced pressure, the residue was subjected to silica gel chromatography (petroleum ether/EtOAc = 4/1) to give aldehyde **9** (2.1 g, quant.) as an orange oil.

$^1H$  NMR (400MHz,  $CDCl_3$ )  $\delta$  9.81 (s, 1H), 7.43-7.27 (m, 10H), 7.15 (s, 1H), 7.12 (s, 1H), 5.14 (s, 4H), 3.89 (s, 3H);  $^{13}C$  NMR (100MHz,  $CDCl_3$ )  $\delta$  191.014, 154.125, 152.926, 142.929, 137.138, 136.295, 131.741, 128.538, 128.386, 128.159, 128.060, 127.999, 127.415, 108.750, 106.534, 75.019, 71.110, 56.181; IR (thin film) 3063, 3032, 2939, 2841, 1693, 1587, 1498, 1454, 1428, 1386, 1327, 1232, 1141, 1120, 979, 833, 737, 697  $cm^{-1}$ ; LRMS (ESI): 349.1 (M + H) $^+$ ; HRMS (ESI): Exact mass calcd for  $C_{22}H_{21}O_4$  (M + H), 349.1440. Found 349.1441.

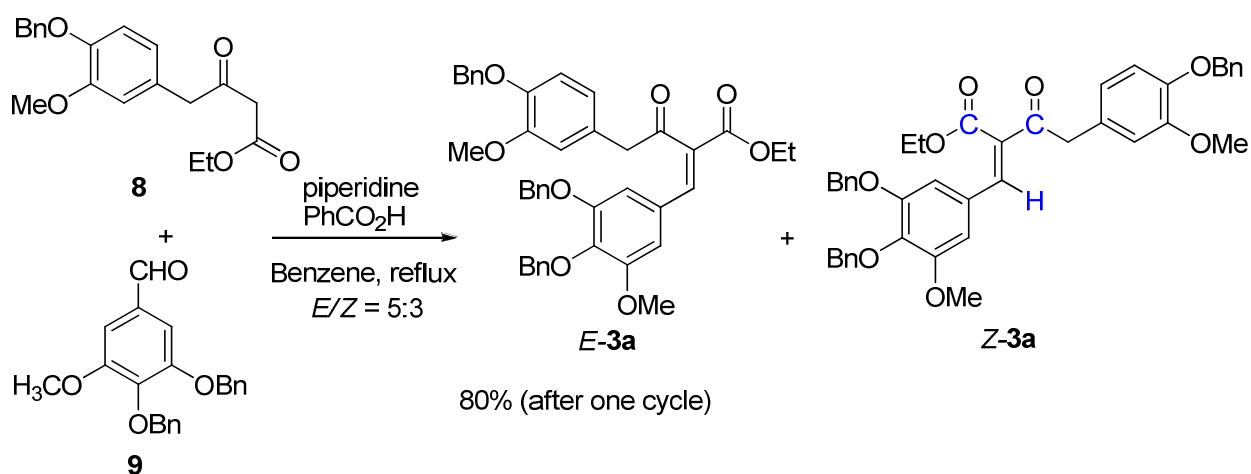

A mixture of  $\beta$ -keto ester **8** (172 mg, 0.50 mmol), aldehyde **9** (174 mg, 0.50 mmol), piperidine (distilled, 8.5 mg, 0.10 mmol) and benzoic acid (9.2 mg, 0.075 mmol) in benzene (20 mL) in a round bottom flask (50 mL) connected to a Dean-Stark apparatus was heated to reflux. After 2.5 hr, the reaction mixture was cooled to room temperature and concentrated at reduced pressure. The residue was subjected to silica gel chromatography (petroleum ether/diethyl ether = 3/1→1/1) to give *E*-**3a** (199 mg, 59% yield) as a light yellow oil and *Z*-**3a** (66 mg, 20% yield) as a white solid. Ketoester **8** and aldehyde **9** were recovered (ca. 23 mg for each) in 13% yield.

*Isomerization of Z-isomer:* A solution of *Z*-**3a** (66 mg, 0.10 mmol) and pyridine (1 drop) in benzene (5 mL) was refluxed for 5 hr. The solution was cooled to room temperature and diluted with ether. The mixture was concentrated at reduced pressure and the residue was subjected to silica gel chromatography (petroleum ether/EtOAc = 2/1) to give *E*-**3a** (38 mg, 58% yield) and *Z*-**3a** (25 mg, 38% yield), respectively.

*E*-**3a**:  $^1\text{H NMR}$  (400 MHz,  $\text{CDCl}_3$ )  $\delta$  7.57 (s, 1H), 7.42-7.24 (m, 15H), 6.70 (d,  $J = 8.0$  Hz, 1H), 6.01 (br, 1H), 6.59 (br, 1H), 6.55 (br, 1H), 6.46 (dd,  $J = 8.4$  Hz, 0.8 Hz, 1H), 5.06 (s, 2H), 5.04 (s, 2H), 4.92 (s, 2H), 4.23 (q,  $J = 7.2$  Hz, 2H), 3.74 (s, 3H), 3.70 (s, 2H), 3.69 (s, 3H), 1.28 (t, 7.2 Hz, 3H);  $^{13}\text{C NMR}$  (100 MHz,  $\text{CDCl}_3$ )  $\delta$  203.447, 164.380, 153.632, 152.531, 149.389, 147.256, 141.138, 139.476, 137.366, 137.055, 136.432, 132.675, 128.500, 128.462, 128.402, 128.143, 127.984, 127.931, 127.749, 127.438, 127.172, 126.064, 121.897, 113.676, 113.418, 108.705, 107.301, 75.004, 70.890, 70.875, 61.501, 56.013, 55.785, 49.956, 14.145; **IR** (thin film) 3063, 3032, 2937, 2873, 1722, 1580, 1513, 1504, 1462, 1454, 1423, 1377, 1333, 1259, 1232, 1158, 1122, 1027, 912, 855, 736, 697  $\text{cm}^{-1}$ ; **LRMS (ESI)**: 673.3 ( $\text{M} + \text{H}$ ) $^+$ ; **HRMS (ESI)** Exact mass calcd for  $\text{C}_{42}\text{H}_{41}\text{O}_8$  ( $\text{M} + \text{H}$ ), 673.2801. Found 673.2812.

*Z*-**3a**:  $^1\text{H NMR}$  (400 MHz,  $\text{CDCl}_3$ )  $\delta$  7.56 (s, 1H), 7.42-7.24 (m, 15H), 6.82 (d,  $J = 8.0$  Hz, 1H), 6.75 (s, 1H), 6.74 (s, 1H), 6.70 (s, 1H), 6.87 (d,  $J = 8.0$  Hz, 1H), 5.13 (s, 2H), 5.08 (s, 2H), 5.05 (s, 2H), 4.17 (q,  $J = 7.2$  Hz, 2H), 3.95 (s, 2H), 3.86 (s, 3H), 3.80 (s, 3H), 1.19 (t,  $J = 7.2$  Hz, 3H);  $^{13}\text{C NMR}$  (100 MHz,  $\text{CDCl}_3$ , **C-H coupling**)  $\delta$  194.02 (td,  $J = 6.8, 6.1$  Hz, **C=O**), 168.07 (dt,  $J = 12.2$  Hz, 3.0 Hz, **COOEt**), 153.65, 152.61, 149.58, 147.21, 141.65, 137.27, 137.08, 136.42, 132.71, 128.51, 128.46, 128.40, 128.29, 128.12, 128.00, 127.92, 127.73, 127.41, 127.34, 127.14, 126.47, 121.63, 113.90, 113.02, 109.05, 107.17, 77.21, 75.03, 71.10, 70.91, 61.71, 56.04, 55.89, 45.15, 13.85.  $^3J_{\text{C-H}} = 6.1$  Hz for  $\text{C}_{\text{ketone-H}}$ ,  $^3J_{\text{C-H}} = 12.2$  Hz for  $\text{C}_{\text{ester-H}}$ .

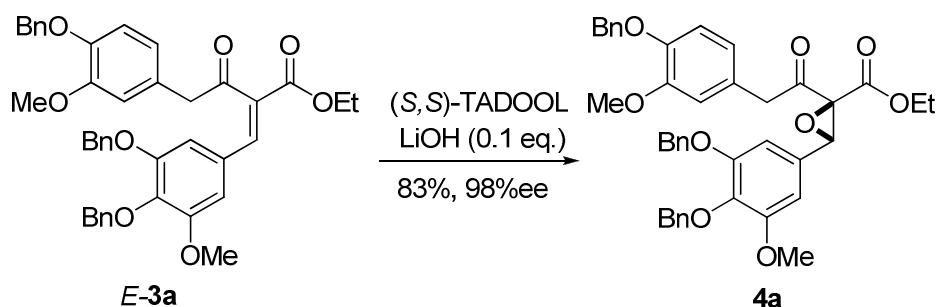

To a solution of *E*-**3a** (17.0 mg, 0.0250 mmol) and (+)-TADDOOL (13.3mg, 0.0275 mmol) in THF (0.15 mL) at 0 °C was added a solution of LiOH (5.0 M, 0.5  $\mu$ L, 0.50 mmol) via syringe. The resulting mixture was stirred at 0 °C for 6 hr, and then warmed up to RT over night. The mixture was subjected to silica gel chromatography (petroleum ether/EtOAc = 10/1 $\rightarrow$ 2/1) to give the desired epoxide **4a** (14.5 mg, 83% yield) as a light yellow oil. The 98% ee of **4a** was determined by converting **4a** into **2a** and then an ee analysis of **2a**. TADDOL was recycled as a white solid in > 90 % yield.

$[\alpha]_D^{23} = -61^\circ$  (*c* 0.96, CHCl<sub>3</sub>); **<sup>1</sup>H NMR** (400 MHz, CDCl<sub>3</sub>)  $\delta$  7.43-7.25 (m, 15H), 6.66 (d, *J* = 8.0Hz, 1H), 6.51 (s, 1H), 6.45 (s, 1H), 6.41 (s, 1H), 6.25 (d, *J* = 8.0 Hz, 1H), 5.05 (s, 2H), 5.04 (d, *J* = 11.6 Hz, 1H), 5.01 (s, 2H), 4.96 (d, *J* = 11.6 Hz, 1H), 4.45 (s, 1H), 4.26 (q, *J* = 7.2 Hz, 2H), 3.76 (s, 3H), 3.69 (d, *J* = 16.8 Hz, 1H), 3.41 (d, *J* = 16.8 Hz, 1H), 1.29 (t, *J* = 7.2 Hz, 3H); **<sup>13</sup>C NMR** (100 MHz, CDCl<sub>3</sub>)  $\delta$  197.974, 165.943, 153.905, 152.744, 149.381, 147.233, 138.003, 137.548 137.047, 136.554, 128.470, 128.432, 128.356, 128.113, 127.916, 127.832, 127.711, 127.415, 127.180, 124.728, 121.768, 113.623, 113.183, 105.099, 103.596, 74.935, 70.958, 70.799, 66.662, 62.859, 62.799, 56.066, 55.846, 47.906, 13.947; **IR** (thin film) 3063, 3032, 2938, 1748, 1726, 1592, 1513, 1454, 1430, 1374, 1262, 1235, 1121, 1026, 850, 736, 697 cm<sup>-1</sup>; **LRMS (ESI)**: 689.3 (M + H)<sup>+</sup>; **HRMS (ESI)**: Exact mass calcd for C<sub>42</sub>H<sub>41</sub>O<sub>9</sub> (M + H), 689.2751. Found 689.2744.

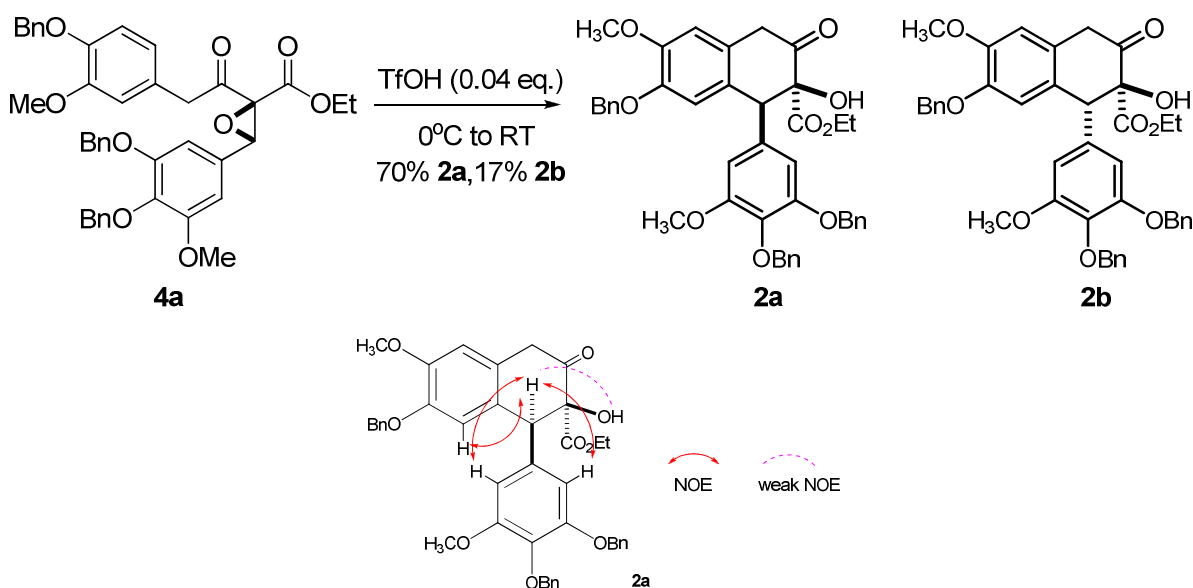

To a solution of epoxide **4a** (344 mg, 0.500 mmol) in CH<sub>2</sub>Cl<sub>2</sub> (35 mL) at -10 °C was added dropwise a freshly prepared solution of TfOH in Et<sub>2</sub>O (0.50 M, 40 μL, 0.020 mmol) via syringe with vigorous stirring. After stirring at this temperature for 15 min, a TLC test indicated the starting material **4a** was completely consumed. The reaction was quenched with addition of Et<sub>3</sub>N (3 μL). The reaction mixture was concentrated under reduced pressure, and the residue was subjected to silica gel chromatography (petroleum ether/EtOAc = 5/1→3/1) to give light blue **2a** (240 mg, 70% yield) and its distereoisomer **2b** (58 mg, 17% yield), respectively. **2a** was determined to be > 98% ee by HPLC analysis [Chiralpak AD, Hexanes/*i*-PrOH = 65:35, 1 mL/min, 220 nm, 20 °C, *t*<sub>R</sub> (1) = 25 min, *t*<sub>R</sub> (2) = 33 min].

**2a**: [α]<sub>D</sub><sup>20</sup> = + 66 (*c* 0.43, CHCl<sub>3</sub>); <sup>1</sup>H NMR (400 MHz, CDCl<sub>3</sub>) δ 7.23-7.45 (m, 15H), 6.64 (s, 1H), 6.62 (s, 1H), 6.37 (d, *J* = 2.0 Hz, 1H), 6.08 (d, *J* = 1.2 Hz, 1H), 5.02 (s, 2H), 5.00 (s, 2H), 4.93 (AB, *J* = 12 Hz, 2H), 4.63 (s, 1H, H-7'), 4.13 (s, 1H, C8'-OH), 4.04 (q, *J* = 6.8 Hz, 2H), 3.91 (s, 3H), 3.88 (d, *J* = 22 Hz, H-7α), 3.77 (s, 3H), 3.48 (d, *J* = 22 Hz, H-7β), 1.02 (t, *J* = 6.8 Hz, 3H). <sup>13</sup>C NMR (100 MHz, CDCl<sub>3</sub>) δ 204.61, 168.78, 153.11, 151.87, 149.40, 147.60, 137.78, 137.07, 136.93, 136.50, 131.97, 128.45, 128.35, 128.06, 127.90, 127.69, 127.65, 127.42, 127.03, 124.68, 114.58, 111.00, 108.46, 107.51, 82.13, 74.92, 70.82, 70.76, 62.02, 56.07, 55.96, 52.75, 40.99, 13.72; IR (thin film) 3436, 2936, 1724, 1589, 1514, 1504, 1454, 1372, 1328, 1298, 1246, 1115, 1014, 736, 697 cm<sup>-1</sup>; LRMS (ESI): 689.3 (M + H)<sup>+</sup>; HRMS (ESI): Exact mass calcd for C<sub>42</sub>H<sub>41</sub>O<sub>9</sub> (M + H), 689.2751. Found 689.2753.

**2b**: <sup>1</sup>H NMR (400 MHz, CDCl<sub>3</sub>): see spectrum; <sup>13</sup>C NMR (100 MHz, CDCl<sub>3</sub>) δ 203.76, 168.43, 153.44, 152.40, 148.92, 146.77, 137.89, 136.92, 136.75, 133.00, 128.46, 128.44, 128.39, 128.15, 127.86, 127.84, 127.79, 127.38, 127.23, 125.27, 114.13, 110.74, 109.19, 107.71, 83.23, 75.01, 70.92, 70.89, 62.24, 58.12, 56.06, 56.03, 42.24, 13.73.

NOTE: Various Lewis acids were screened for their ability to effect the intramolecular epoxide ring opening Friedel-Crafts cyclization with **4a** to form the 2,7'-cyclo lignane skeleton with concomitant installation of the C7' stereocenter. Although both SnCl<sub>4</sub><sup>4a-c</sup> and BF<sub>3</sub>·Et<sub>2</sub>O<sup>4d</sup> have been documented for promoting Friedel-Crafts reaction with epoxides, only the latter promoted the desired cyclization when employed in large excess (six equivalents). However, the yield of the BF<sub>3</sub>-promoted Friedel-Crafts reaction was found to be inconsistent at a scale of greater than 100 mg.

<sup>4</sup> (a) Nicolaou, K. C.; Wu, T. R.; Kang, Q.; Chen, D. Y.-K. *Angew. Chem. Int. Ed.* **2009**, *48*, 3440. (b) Kraus, G. A.; Kim, I. *Org. Lett.* **2003**, *5*, 1991. (c) Amupitan, J.; Sutherland, J. K. *J. Chem. Soc., Chem. Commun.* **1978**, 852. (d) Ono, M.; Suzuki, K.; Akia, H. *Tetrahedron Lett.* **1999**, *40*, 8223.



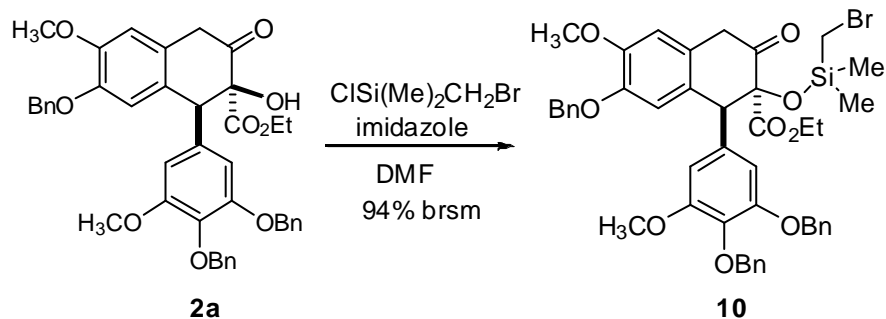

To a solution of hydroxyketone **2a** (180 mg, 0.26 mmol) in anhydrous DMF (1.0 mL) at RT was added  $\text{ClSi}(\text{Me})_2\text{CH}_2\text{Br}$  (113  $\mu\text{L}$ , 0.83 mmol), followed by imidazole (54 mg, 0.78 mmol). The resulting mixture was stirred at this temperature for 1 hr and then subjected to silica gel chromatography directly eluted with petroleum ether/EtOAc = 10/1 $\rightarrow$ 3/1 to give silyl ether **10** (165 mg, 94% yield brsm) as light green foam, and the starting material (37 mg, 20% recovery).

$[\alpha]_{\text{D}}^{20} = +42.4$  ( $c$  1.34,  $\text{CHCl}_3$ );  $^1\text{H NMR}$  (400 MHz,  $\text{CDCl}_3$ )  $\delta$  7.50~7.15 (m, 15H), 6.59 (s, 2H), 6.36 (s, 1H), 6.03 (s, 1H), 5.00 (s, 2H), 4.99 (s, 2H), 4.93 (AB,  $J = 12.4$  Hz, 2H), 4.53 (s, 1H), 4.02 (m, 2H), 3.89 (s, 3H), 3.77 (A of AB,  $J = 22.0$  Hz, 1H), 3.77 (s, 3H), 3.46 (B of AB,  $J = 22.0$  Hz, 1H), 2.41 (A of AB,  $J = 12.7$  Hz, 1H), 2.27 (B of AB,  $J = 12.7$  Hz, 1H), 1.02 (t,  $J = 7.1$  Hz, 3H), 0.13 (s, 3H), 0.06 (s, 3H);  $^{13}\text{C NMR}$  (100 MHz,  $\text{CDCl}_3$ )  $\delta$  204.16, 168.90, 153.01, 151.97, 149.35, 147.49, 137.67, 137.06, 137.03, 136.53, 132.78, 128.45, 128.42, 128.40, 128.09, 127.86, 127.75, 127.68, 127.39, 127.22, 126.99, 124.76, 114.50, 110.76, 108.57, 107.94, 85.71, 75.06, 71.01, 70.75, 61.92, 56.11, 55.95, 54.87, 42.08, 18.63, 13.72, -1.01, -1.10; **IR** (thin film) 3088, 3064, 3032, 2936, 1731, 1590, 1514, 1454, 1248, 1114, 1028  $\text{cm}^{-1}$ ; **LRMS (ESI)**: 841.2, 839.2 ( $\text{M} + \text{H}$ ) $^+$ ; **HRMS (ESI)**: Exact mass calcd for  $\text{C}_{45}\text{H}_{48}\text{O}_9\text{BrSi}$  ( $\text{M} + \text{H}$ ), 839.2251. Found 839.2239.

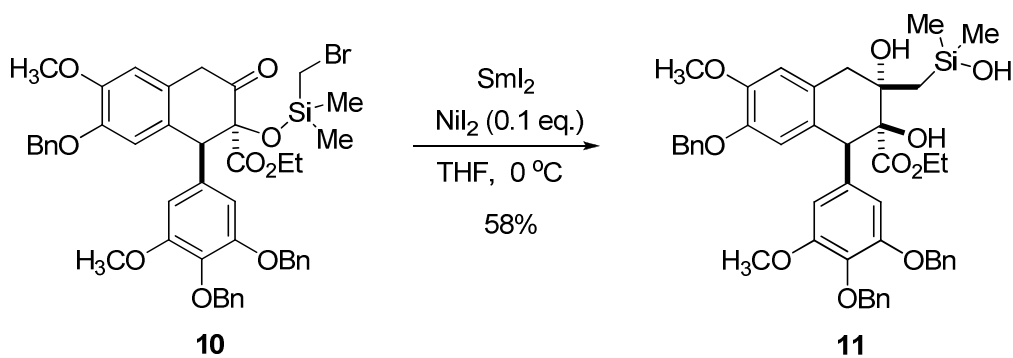

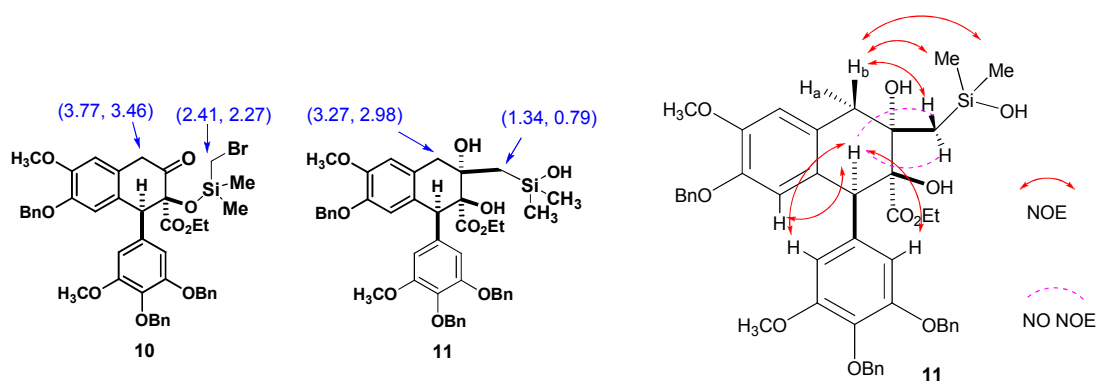

To a solution of bromide **10** (120 mg, 0.143 mmol) in anhydrous THF (10 mL) under  $N_2$  at 0 °C was added  $SmI_2$  (0.10M THF soln, containing 1 mol %  $NiI_2$ , 5.0 mL, 0.50 mmol) dropwise. The resulting mixture was stirred at 0 °C for 1 hr and then let warm to RT. The solvent was evaporated and the residue was taken up in EtOAc, rinsed with aq.  $NaHCO_3$  (sat.) and brine successively. The organic layer was dried over anhydrous  $Na_2SO_4$ . After the solvent was removed by rotavap, the residue was subjected to purification on silica gel eluted with petroleum ether/EtOAc = 3/1  $\rightarrow$  2/1 to give silanol **11** (65 mg, 58% yield) as dense colorless liquid. Splitting and broadening peaks are observed in both the  $^1H$  NMR and  $^{13}C$  NMR spectra due to the existence of atropisomers arising from hindered rotation along  $C1'-C7'$  bond.

$[\alpha]_D^{20} = -2.98$  ( $c$  1.17,  $CHCl_3$ );  $^1H$  NMR (400 MHz,  $CDCl_3$ )  $\delta$  7.50~7.18 (m, 15H), 6.65 (s, 1H), 6.44 (br, 0.4H), 6.38 (br, 0.6H), 6.29 (br, 0.6H), 6.25 (br, 1.4H), 5.09 (br, 1H), 5.08 (s, 2H), 4.89~4.78 (m, 2H), 4.81 (s, 1H), 4.57 (s, 1H), 4.10 (m, 1.2H), 3.98 (m, 0.8H), 3.89 (s, 3H), 3.82 (s, 1.8H), 3.67 (s, 1.2H), 3.55 (br, 1H), 3.27 (A of AB,  $J = 16.9$  Hz), 2.98 (B of AB,  $J = 16.9$  Hz), 2.86 (br, 1H), 1.34 (A of AB,  $J = 14.6$  Hz), 1.11 (t,  $J = 6.8$  Hz), 0.79 (B of AB,  $J = 14.6$  Hz), 0.30 (s, 3H), 0.22 (s, 3H);  $^{13}C$  NMR (100 MHz,  $CDCl_3$ )  $\delta$  174.71, 153.80 (br), 153.19 (br), 152.34 (br), 152.04 (br), 148.40, 146.19, 137.78, 137.15, 136.86 (br), 134.66, 128.46 (br), 128.39, 128.30, 128.11, 128.07 (br), 127.78, 127.61, 127.28, 127.14, 127.06 (br), 126.66, 114.94, 111.77, 110.36 (br), 108.52, 107.02 (br), 81.53, 75.54, 74.93, 71.16 (br), 70.90 (br), 70.33 (br), 62.35, 56.07 (br), 55.90, 50.39 (br), 39.00, 27.82 (br), 14.09, 2.29, 2.14; IR (thin film) 3505, 3063, 3031, 2936, 1712, 1589, 1514, 1454, 1373, 1330, 1252, 1213, 1119, 1028  $cm^{-1}$ ; LRMS (ESI): 801.3 ( $M + Na$ ) $^+$ ; HRMS (ESI): Exact mass calcd for  $C_{45}H_{50}O_{10}NaSi$  ( $M + Na$ ), 801.3071. Found 801.3062.

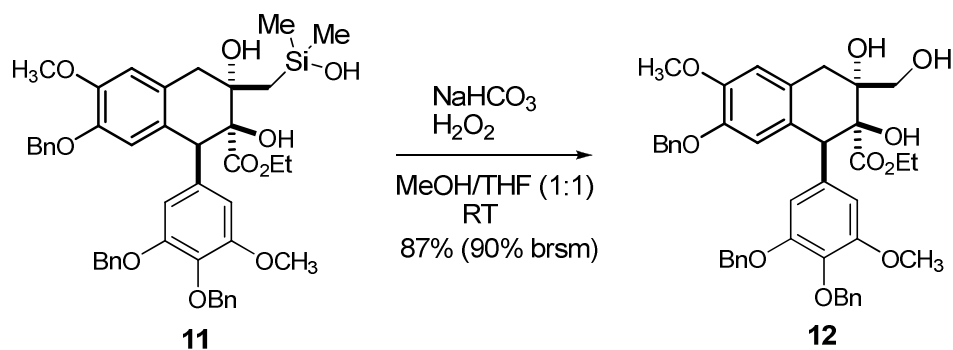

To a solution of silanol **11** (65 mg, 0.084 mmol) in a mixed solvent of MeOH/THF (1:1, 6.0 mL) at RT was added NaHCO<sub>3</sub> (45 mg, 0.54 mmol) in one portion and H<sub>2</sub>O<sub>2</sub> (35%, 150 μL, ca. 1.5 mmol) successively. The resulting mixture was stirred at this temperature over night. The solvent was evaporated at reduced pressure and the residue was subjected to silica gel chromatography eluted with petroleum ether/EtOAc = 3/1 → 1/1 to give triol **12** (50 mg, 87% yield, 90% yield brsm) as dense colorless liquid, along with recovered substrate (3mg). [Splitting and broadening peaks are observed in both the <sup>1</sup>H NMR and <sup>13</sup>C NMR spectra due to the existence of atropisomers arising from hindered rotation along C1'-C7' bond.](#)

$[\alpha]_D^{20} = +5.31$  (*c* 0.833, CHCl<sub>3</sub>); **<sup>1</sup>H NMR** (400 MHz, CDCl<sub>3</sub>) δ 7.49~7.16 (m, 15H), 6.65 (s, 1H), 6.39 (br, 2H), 6.23 (s, 1H), 5.08 (s, 2H), 5.05 (m, 1H), 4.89~4.79(3H), 4.58 (s, 1H), 4.08 (br, 2H), 3.88 (s, 3H), 3.82 (br, 1.4H), 3.74 (br, 1.6H), 3.55~3.53(br, 2H), 3.25 (br, 1H), 3.14 (A of AB, *J* = 17.2 Hz, 1H), 2.68 (B of AB, *J* = 17.2 Hz, 1H), 1.89 (br, 1H), 1.17 (br, 3H); **<sup>13</sup>C NMR** (100 MHz, CDCl<sub>3</sub>) δ 174.90, 153.64-153.04 (br), 152.29-151.94 (br), 148.33, 146.27, 137.83, 137.13, 136.92 (br), 134.20, 128.40, 128.31, 128.27, 128.10, 127.76, 127.67, 127.62, 127.28, 127.15, 125.52, 114.92, 111.80, 110.89 (br), 108.88 (br), 107.40 (br), 77.76, 74.91, 74.83, 71.14 (br), 70.86, 70.37 (br), 66.11, 62.50, 56.06 (br), 55.94, 49.94, 34.95, 29.66, 14.03; **IR** (thin film) 3506, 3064, 3031, 2936, 1712, 1589, 1514, 1453, 1373, 1330, 1252, 1213, 1119, 1028 cm<sup>-1</sup>; **LRMS (ESI)**: 721.3 (M + H)<sup>+</sup>; **HRMS (ESI)**: Exact mass calcd for C<sub>43</sub>H<sub>45</sub>O<sub>10</sub> (M + H), 721.3013. Found 721.3010.

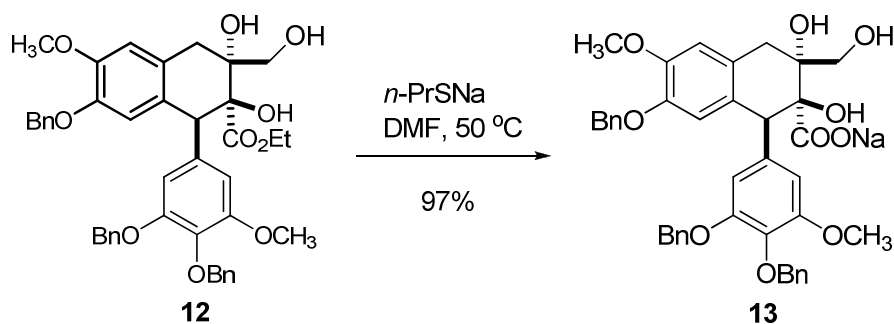

Triol **12** (50 mg, 0.069 mmol) was placed in a dry flask under  $\text{N}_2$  and a freshly prepared solution of  $n\text{-PrSNa}$  in anhydrous DMF (0.15 M, 0.60 mL, 0.090 mmol) was introduced. The resulting mixture was stirred at  $50\text{ }^\circ\text{C}$  for 24 hr. DMF was then evaporated at reduced pressure and the residue was subjected to silica gel chromatography eluted with  $\text{CH}_2\text{Cl}_2/\text{CH}_3\text{OH} = 5/1 \rightarrow 0/1$  to give sodium carboxylate **13** (48 mg, 97% yield) as white amorphous powder. **Splitting and broadening peaks are observed in both the  $^1\text{H}$  NMR and  $^{13}\text{C}$  NMR spectra due to the existence of atropisomers arising from hindered rotation along  $\text{C1}'\text{-C7}'$  bond.**

$[\alpha]_{\text{D}}^{20} = +62.5$  ( $c$  0.233,  $\text{CHCl}_3$ );  **$^1\text{H}$  NMR** (400 MHz,  $\text{CD}_3\text{OD}$ )  $\delta$  7.42~7.13 (m, 15H), 6.73 (s, 1H), 6.69-6.62 (split br, 1H), 6.46-6.36 (split br, 1H), 6.23 (s, 1H), 5.10~4.70 (6H), 4.64 (s, 1H), 3.82 (s, 3H), 3.77-3.51 (split br, 3H), 3.68 (A of AB,  $J = 11.2$  Hz, 1H), 3.60 (B of AB,  $J = 11.2$  Hz, 1H), 3.13 (A of AB,  $J = 17.0$  Hz, 1H), 2.75 (A of AB,  $J = 17.0$  Hz, 1H);  **$^{13}\text{C}$  NMR** (125 MHz,  $\text{CD}_3\text{OD}$ )  $\delta$  179.94 (br), 154.05 (br), 152.96 (br), 149.48, 147.24, 139.31, 138.74, 137.90, 137.25, 131.40, 129.67, 129.36, 129.13, 129.02, 128.87, 128.72, 28.47, 116.87, 113.66, 112.59 (br), 111.02 (br), 110.78 (br), 109.43 (br), 78.82 (br), 76.14, 75.87, 72.02 (br), 71.45 (br), 67.86, 56.57, 51.19, 35.61, 30.75 (br); **IR** (thin film) 3439, 3089, 3063, 3031, 2922, 2852, 1651, 1598, 1514, 1504, 1454, 1378, 1327, 1255, 1218, 1119, 1100,  $1027\text{cm}^{-1}$ ; **LRMS (ESI)**: 715.3 ( $\text{M} + \text{H}$ )<sup>+</sup>; **HRMS (ESI)**: Exact mass calcd for  $\text{C}_{41}\text{H}_{40}\text{O}_{10}\text{Na}$  ( $\text{M} + \text{H}$ ), 715.2519. Found 715.2507.

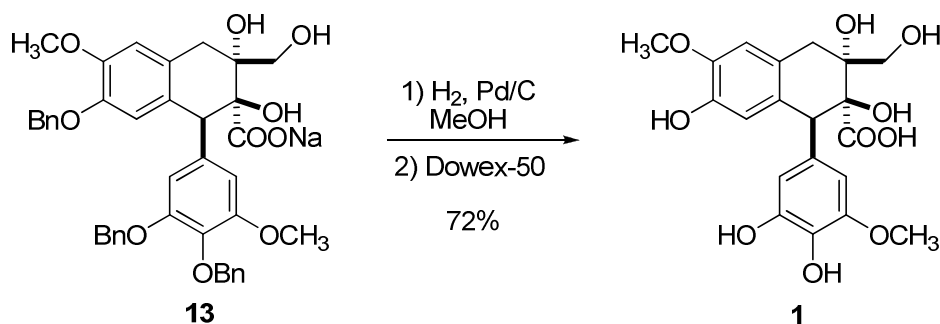

To a solution of sodium carboxylate **13** (47 mg, 0.066 mmol) in MeOH (25 mL) was added Pd/C (15%, 20 mg). A balloon filled with H<sub>2</sub> was connected to the flask. The reaction mixture was flushed with H<sub>2</sub> by 3 cycles of vacuuming/refilling and then kept stirring at RT for 4 hr. The mixture was then filtered through a Dowex-50 column, which was further eluted with MeOH. The filtrate was collected and concentrated at reduced pressure to give a light brown solid (28 mg, 100% crude yield). The crude product was further purified on preparative TLC plate developing with CH<sub>2</sub>Cl<sub>2</sub>/CH<sub>3</sub>OH (4:1) to give a light tan amorphous solid (20 mg, 72% yield). Splitting and broadening peaks are observed in both the <sup>1</sup>H NMR and <sup>13</sup>C NMR spectra due to the existence of atropisomers arising from hindered rotation along C1'-C7' bond.

### Synthetic Sample

$[\alpha]_D^{20} = -40$  (c 0.040, water),  $-130$  (c 0.017, water); <sup>1</sup>H NMR (400 MHz, CD<sub>3</sub>OD, 21 °C) δ 6.67 (s, 1H), 6.51 (br, 1H), 6.36 (br, 1H), 6.22 (s, 1H), 4.59 (m, 1H), 3.81 (s, 3H), 3.747-3.66 (4H), 3.51 (br, 1H), 3.11 (A of AB, *J* = 16.2 Hz, 1H), 2.65 (B of AB, *J* = 16.2 Hz, 1H); <sup>1</sup>H NMR (400 MHz, CD<sub>3</sub>OD, 70 °C) δ 6.67 (s, 1H), 6.47 (br, 2H), 6.25 (s, 1H), 4.57 (s, 1H), 3.82 (s, 3H), 3.73 (br, 4H), 3.53 (br, 1H), 3.15 (A of AB, *J* = 17.2 Hz, 1H), 2.64 (B of AB, *J* = 17.2 Hz, 1H); <sup>13</sup>C NMR (125 MHz, CD<sub>3</sub>OD, 21 °C) δ 181.20 (br), 149.25 (br), 148.58 (br), 147.50, 146.00 (br), 145.32 (br), 145.25, 134.02 (br), 132.65(br), 132.18 (br), 126.11 (br), 117.30, 114.43 (br), 113.03, 112.62, 109.38 (br), 107.37 (br), 78.82 (br), 76.09 (br), 67.41 (br), 56.66 (br), 56.48, 50.52 (br), 36.03; IR (thin film) 3392 (br, strong), 2954, 1611 (split), 1515, 1350 (br), 1236 (br, multiple), 1104, 870 (weak) cm<sup>-1</sup>; LRMS (ESI): 445.1 (M + Na)<sup>+</sup>; HRMS (ESI): Exact mass calcd for C<sub>20</sub>H<sub>22</sub>O<sub>10</sub>Na (M + Na), 445.1111. Found 445.1112.

### Authentic Sample

$[\alpha]_D^{21} = -9.99$  (water)<sup>5</sup>;  $[\alpha]_D^{20} = -18$  (c 0.040, water); <sup>1</sup>H NMR (400 MHz, CD<sub>3</sub>OD, 21 °C) δ 6.68 (s, 1H), 6.50 (br, 1H), 6.33 (br, 1H), 6.24 (s, 1H), 4.54 (m, 1H), 3.81 (s, 3H), 3.81-3.67 (4H), 3.58 (br, 1H), 3.12 (A of AB, *J* = 16.6Hz, 1H), 2.79 (B of AB, *J* = 16.6Hz, 1H); <sup>1</sup>H NMR (400 MHz, CD<sub>3</sub>OD, 70 °C) δ 6.67 (s, 1H), 6.45 (s, 2H), 6.27 (s, 1H), 4.55 (m, 1H), 3.82 (s, 3H), 3.77 (br, 3H), 3.68 (A of AB, *J* = 11.2 Hz, 1H), 3.61 (B of AB, *J* = 11.2 Hz, 1H), 3.17 (A of AB, *J* = 16.6 Hz, 1H), 2.75 (B of AB, *J* = 16.6 Hz, 1H); <sup>13</sup>C NMR (125 MHz, CD<sub>3</sub>OD, 21 °C) δ 180.52, 149.14, 148.67, 147.42, 145.80, 145.38, 145.06, 133.91, 132.72, 132.12, 126.78, 117.23, 114.17, 113.00, 112.68, 109.12, 107.50, 79.04, 75.72, 68.38, 56.63, 56.44, 50.67, 35.19; IR (thin film)

<sup>5</sup> Gradner, J. A. F.; Barton, G. M.; MacLean, H. *Can. J. Chem.* **1959**, *37*, 1703.

3391 (br, strong), 2957, 1610 (split), 1515, 1361 (br), 1236 (br), 1097, 868 (weak)  $\text{cm}^{-1}$ ; **LRMS (ESI)**: 445.1 ( $\text{M} + \text{Na}$ )<sup>+</sup>; **HRMS (ESI)**: Exact mass calcd for  $\text{C}_{20}\text{H}_{22}\text{O}_{10}\text{Na}$  ( $\text{M} + \text{Na}$ ), 445.1111. Found 445.1111.

**Mixture Sample\*** [prepared by mixing the Authentic Sample (~10 mg) and Synthetic Sample (~10mg)]

**<sup>1</sup>H NMR** (400 MHz,  $\text{CD}_3\text{OD}$ , 21 °C)  $\delta$  6.65 (s, 1H), 6.48 (br, 1H), 6.32 (br, 1H), 6.21 (s, 1H), 4.54 (m, 1H), 3.79 (s, 3H), 3.79-3.64 (4H), 3.57 (br, 1H), 3.11 (A of AB,  $J = 16.6$  Hz, 1H), 2.72 (B of AB,  $J = 16.6$  Hz, 1H); **<sup>1</sup>H NMR** (400 MHz,  $\text{CD}_3\text{OD}$ , 70 °C)  $\delta$  6.67 (s, 1H), 6.46 (s, 2H), 6.26 (s, 1H), 4.56 (m, 1H), 3.83 (s, 3H), 3.75 (br, 3H), 3.66 (br, 1H), 3.62 (br, 1H), 3.16 (A of AB,  $J = 16.6$  Hz, 1H), 2.70 (B of AB,  $J = 16.6$  Hz, 1H); **<sup>13</sup>C NMR** (125 MHz,  $\text{CD}_3\text{OD}$ , 21 °C)  $\delta$  180.77, 149.16, 148.60, 147.44, 145.85, 145.29, 145.12, 133.96, 132.69, 132.13, 126.47, 117.26, 114.27, 113.00, 112.65, 109.24, 107.41, 78.95, 75.86, 67.96, 56.63, 56.45, 50.59, 35.53;

Comparison of  $^{13}\text{C}$  NMR

|                 | AUTHENTIC | SYNTHETIC | MIXTURE* |
|-----------------|-----------|-----------|----------|
| 1               | 180.52    | 181.20    | 180.77   |
| 2 <sup>a</sup>  | 149.14    | 149.25    | 149.16   |
| 3 <sup>a</sup>  | 148.67    | 148.58    | 148.60   |
| 4               | 147.42    | 147.50    | 147.44   |
| 5 <sup>b</sup>  | 145.80    | 146.00    | 145.85   |
| 6 <sup>b</sup>  | 145.38    | 145.32    | 145.29   |
| 7               | 145.06    | 145.25    | 145.12   |
| 8               | 133.91    | 134.02    | 133.96   |
| 9               | 132.72    | 132.65    | 132.69   |
| 10              | 132.12    | 132.18    | 132.13   |
| 11              | 126.78    | 126.11    | 126.47   |
| 12              | 117.23    | 117.30    | 117.26   |
| 13 <sup>c</sup> | 114.17    | 114.43    | 114.27   |
| 14              | 113.00    | 113.03    | 113.00   |
| 15 <sup>c</sup> | 112.68    | 112.62    | 112.65   |
| 16 <sup>d</sup> | 109.12    | 109.38    | 109.24   |
| 17 <sup>d</sup> | 107.50    | 107.37    | 107.41   |
| 18              | 79.04     | 78.82     | 78.95    |
| 19              | 75.72     | 76.09     | 75.86    |
| 20              | 68.38     | 67.41     | 67.96    |
| 21              | 56.63     | 56.66     | 56.63    |
| 22              | 56.44     | 56.48     | 56.45    |
| 23              | 50.67     | 50.52     | 50.59    |
| 24              | 35.19     | 36.03     | 35.53    |

\* Mixture Sample was prepared by mixing the Authentic Sample (~10 mg) and Synthetic Sample (~10mg).

<sup>a</sup> probably splitting from one carbon due to existence of the rotamers.

<sup>b</sup> probably splitting from one carbon due to existence of the rotamers.

<sup>c</sup> probably splitting from one carbon due to existence of the rotamers.

<sup>d</sup> probably splitting from one carbon due to existence of the rotamers.

### Characterization of synthetic plicatic acid by spiking experiments and CD spectrometry

The  $^1\text{H}$  and  $^{13}\text{C}$  NMR spectra of natural plicatic acid were not reported. Perhaps due to numerous possible patterns of intra or inter molecular hydrogen bonding interactions between various functionalities, the  $^1\text{H}$  and  $^{13}\text{C}$  NMR spectra were found to vary with either the synthetic or the authentic sample. The identity of the synthetic (-)-plicatic acid was established by spiking experiments. A sample of an approximately 1:1 mixture of synthetic and authentic plicatic acids was prepared. Spectroscopic and chromatographic studies of this mixture, including  $^1\text{H}$  NMR,  $^{13}\text{C}$  NMR as well as HPLC chromatograms obtained with two different columns, showed that the mixture was homogeneous. The exact mass of both the synthetic and natural plicatic acid was determined to be consistent with the molecular formula of plicatic acid by HRMS analysis. The absolute configuration of the synthetic sample was determined to be the same as the natural plicatic acid through a comparison of their respective CD spectrum.

#### 1. $^1\text{H}$ NMR and $^{13}\text{C}$ NMR (see page S73-S99)

First, NMR ( $^1\text{H}$  NMR and  $^{13}\text{C}$  NMR) spectra of Synthetic Sample and Authentic Sample were recorded respectively; they were found to be slightly different. Then, NMR ( $^1\text{H}$  NMR and  $^{13}\text{C}$  NMR) spectra of Mixture Sample comprising Synthetic Sample and Authentic Sample in approximately 1:1 ratio were recorded; only one set of peaks was observed in the NMR spectra, which indicated that the mixture sample was homogeneous. It's worth mentioning that **both  $^1\text{H}$  NMR and  $^{13}\text{C}$  NMR spectra of these samples show splitting and broadening peaks** probably due to atropisomerism (retarded rotation along C1'-C7' bond) and extensive hydrogen bonding interactions as well. **Similar splitting and broadening patterns are present in the  $^1\text{H}$  NMR and  $^{13}\text{C}$  NMR spectra of 11, 12, and 13.**

#### 2. VT- $^1\text{H}$ NMR (see page S100)

VT- $^1\text{H}$  NMR experiments were performed on Authentic Sample, Synthetic Sample, Mixture Sample, respectively, at 21, 30, 40, 50, 60, and 70 °C in stages. Similar patterns and trends in the NMR spectra were observed for all three samples.

Take Mixture Sample for instance. Two separate peaks (1H for each by integration) at  $\delta$  6.48 and  $\delta$  6.32 at 21 °C gradually merge into one at  $\delta$  6.46 (2H by integration) as the temperature steadily rises to 70 °C;  $\text{CH}_3\text{O}$  (on pending ring C) gives split peaks at  $\delta$  3.79 and  $\delta$  3.64 (3H combined, by integration) at 21 °C which gradually unite at  $\delta$  3.75 (3H by integration) as the temperature steadily rises to 70 °C.



### 3. HPLC (see page S106)

HPLC analysis was performed using two different columns, Zorbax Rx C8 and Symmetry® C18, for Synthetic Sample, Authentic Sample and Mixture Sample, respectively. On Zorbax Rx C8 column (100% water, 0.25 mL/min, 254 nm), the retention time for Synthetic, Authentic, Mixture Sample are 7.91, 7.91, 8.05 min. On Symmetry® C18 column (100% water, 0.20 mL/min, 254 nm), the retention time for Synthetic, Authentic, Mixture Sample are 9.19, 8.97, 9.09 min, respectively. Thus, only one peak was shown by HPLC analysis of Mixture Sample.

### 4. CD (see page S106)

A comparison of CD spectrum of Synthetic Sample and Authentic Sample indicates they are of the same absolute configuration.

Pulse Sequence: s2pul

Solvent: CDCl3  
Ambient temperature  
File: kyb-1-34-2-pure  
INOVA-500 "gamble"Pulse 46.1 degrees  
Acq. time 1.638 sec  
Width 5000.0 Hz  
16 repetitions  
OBSERVE H1, 399.7532349 MHz  
DATA PROCESSING  
FT size 16384  
Total time 0 min, 52 sec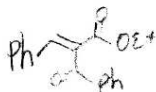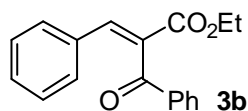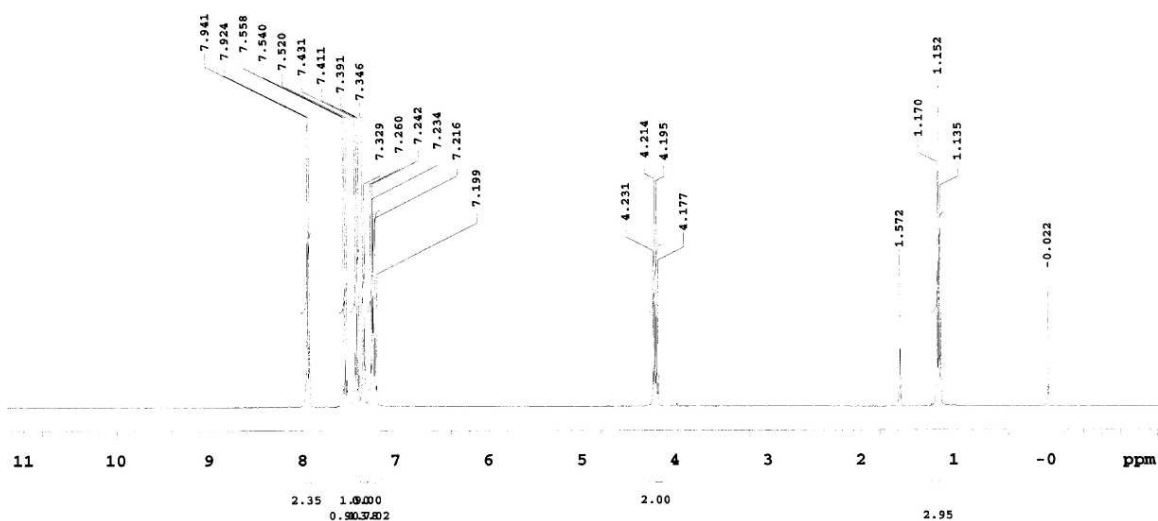Solvent: CDCl3  
Ambient temperature  
File: kyb-1-34-c  
INOVA-500 "gamble"Pulse 53.1 degrees  
Acq. time 1.199 sec  
Width 25000.0 Hz  
772 repetitions  
OBSERVE C13, 100.5180359 MHz  
DECOUPLE H1, 399.7552490 MHz  
Power 37 dB  
on during acquisition  
off during delay  
GARP-1 modulated  
DATA PROCESSING  
Line broadening 1.0 Hz  
FT size 65536  
Total time 336168 hr, 19 min, 12 sec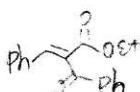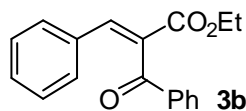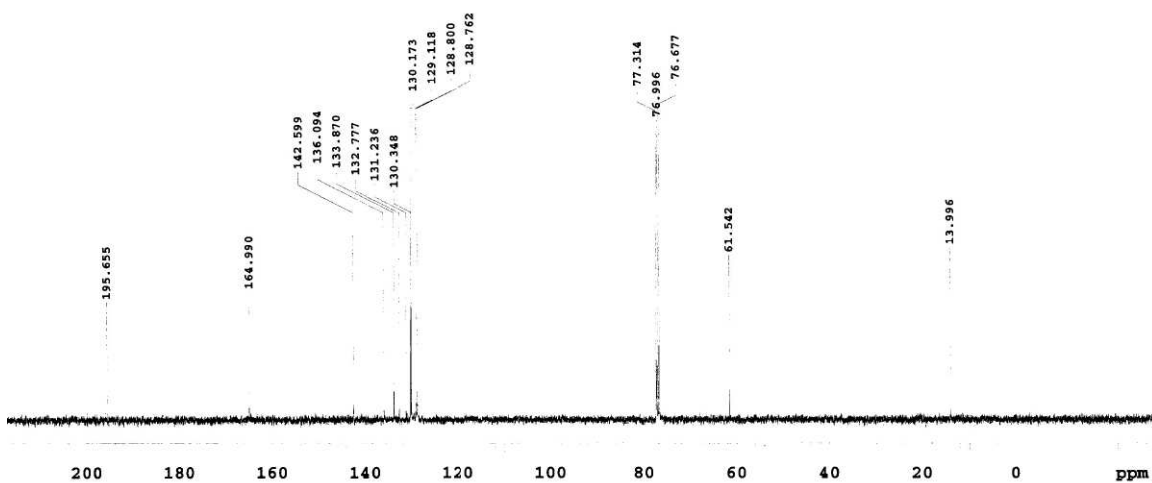

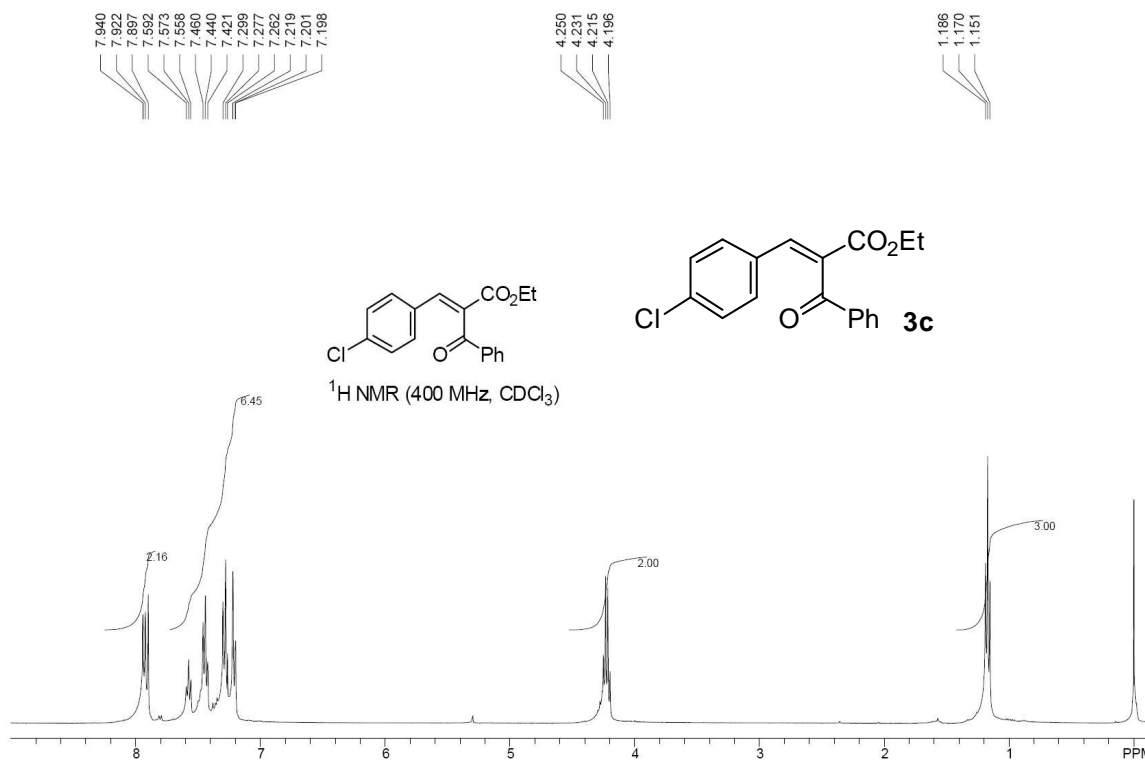

Pulse Sequence: s2pul  
Solvent: CDCl<sub>3</sub>  
Ambient temperature  
INOVA-400 "fid"

Pulse 53.1 degrees  
Acq. time 1.199 sec  
Width 25000.0 Hz  
808 repetitions  
OBSERVE C13, 100.5180342 MHz  
DECOUPLE H1, 399.7552472 MHz  
Power 37 dB  
on during acquisition  
off during delay  
GARP-1 modulated  
DATA PROCESSING  
Line broadening 1.0 Hz  
FT size 65536  
Total time 335612 hr, 45 min, 52 sec

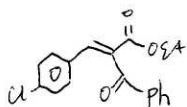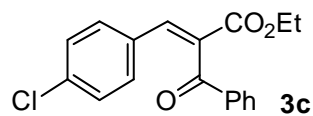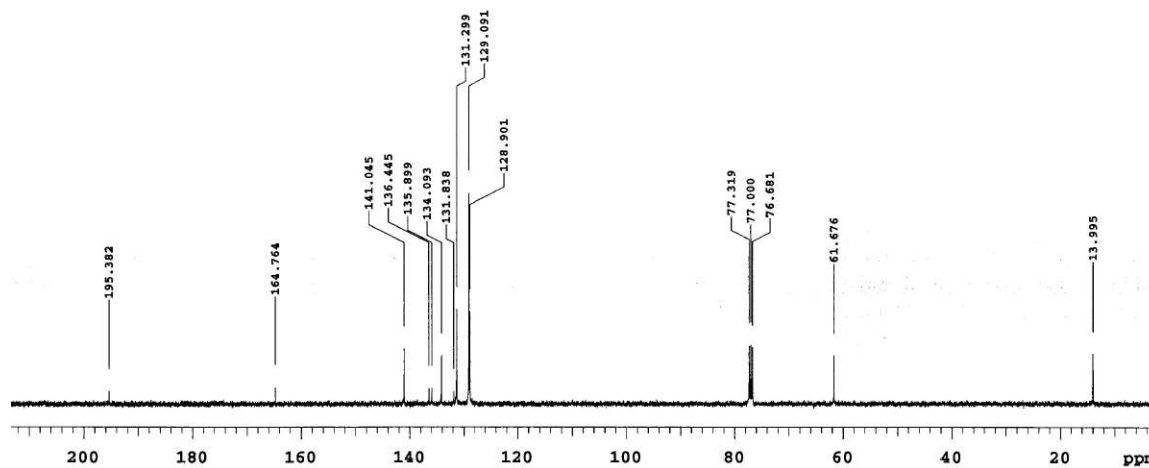

Pulse Sequence: s2pul  
 Solvent: CDCl3  
 Ambient temperature  
 File: Kyb-1-50HH  
 INOVA-500 "gamble"

Pulse 46.1 degrees  
 Acq. time 1.638 sec  
 Width 5000.0 Hz  
 54 repetitions  
 OBSERVE H1, 399.7532349 MHz  
 DATA PROCESSING  
 FT size 16384  
 Total time 1 min, 29 sec

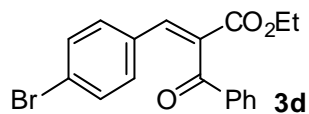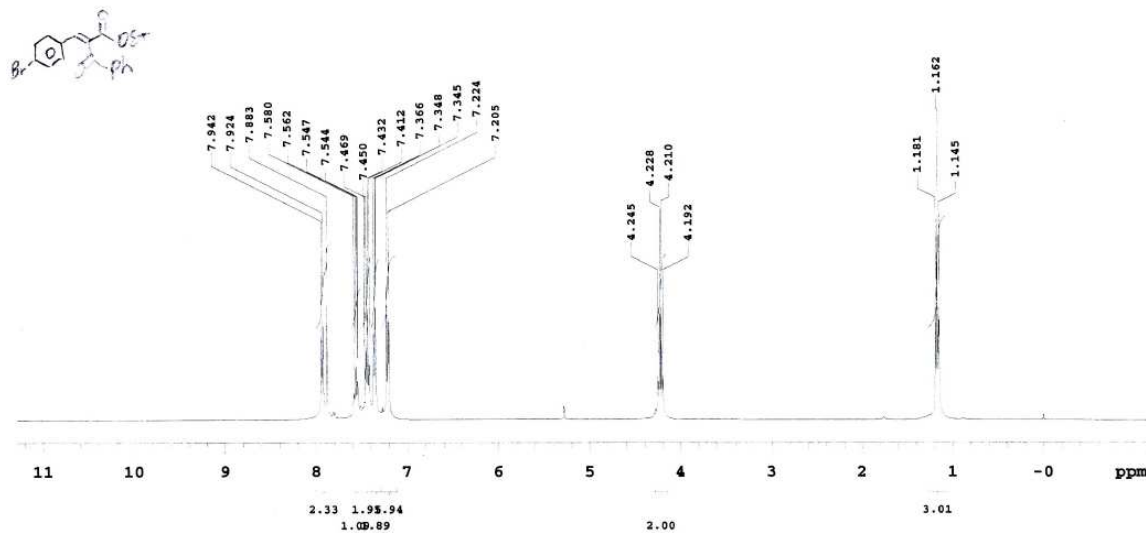

Pulse Sequence: s2pul  
 Solvent: CDCl3  
 Ambient temperature  
 INOVA-400 "fid"

Pulse 53.1 degrees  
 Acq. time 1.199 sec  
 Width 25000.0 Hz  
 258 repetitions  
 OBSERVE C13, 100.5180426 MHz  
 DECOUPLE H1, 399.7552472 MHz  
 Power 37 dB  
 on during acquisition  
 off during delay  
 GARP-1 modulated  
 DATA PROCESSING  
 FT size 65536  
 Total time 335612 hr, 45 min, 52 sec

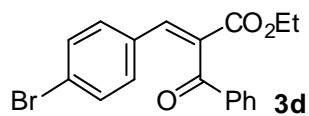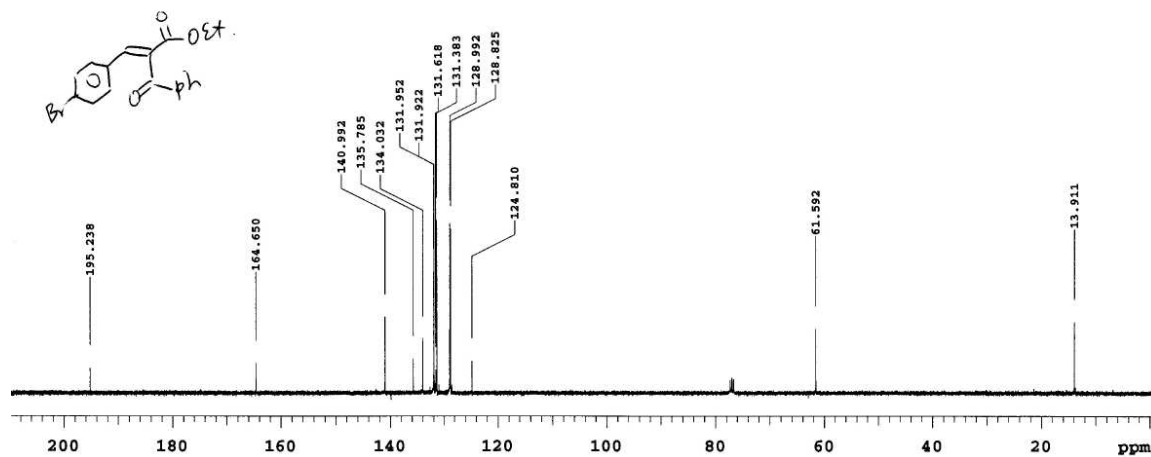

Pulse Sequence: s2pul  
Solvent: CDCl3  
Ambient temperature  
File: Kyb-1-62MH  
INOVA-500 "gamble"  
  
Pulse 46.1 degrees  
Acq. time 1.638 sec  
Width 5000.0 Hz  
24 repetitions  
OBSERVE H1, 399.7532349 MHz  
DATA PROCESSING  
FT size 16384  
Total time 1 min, 27 sec

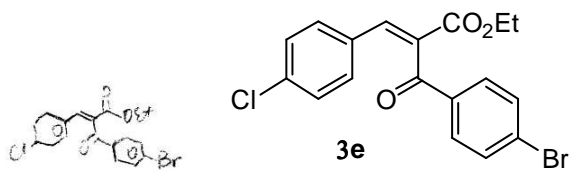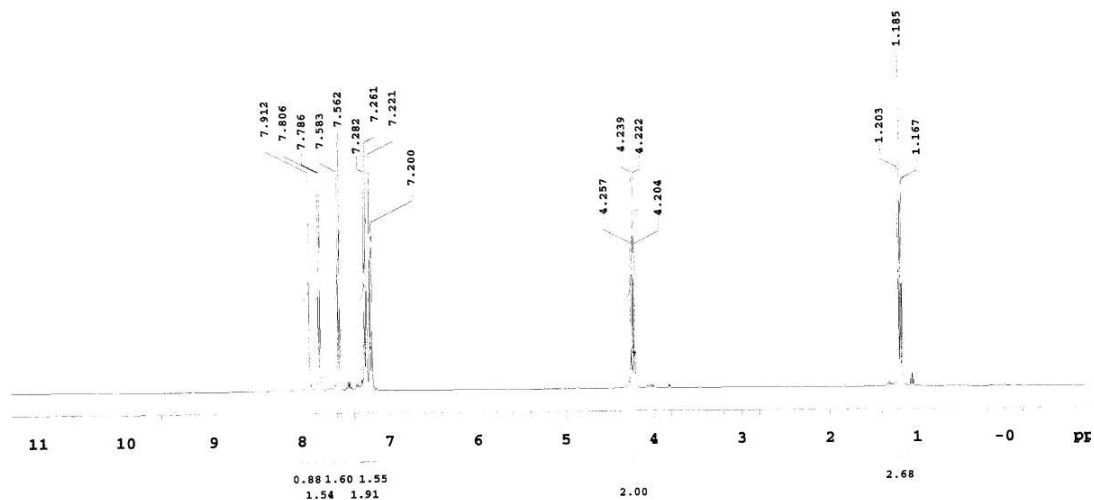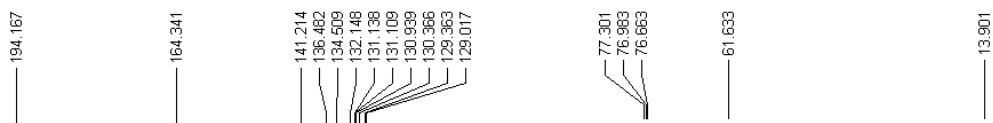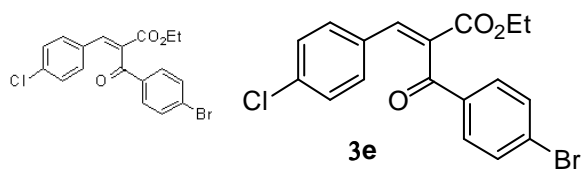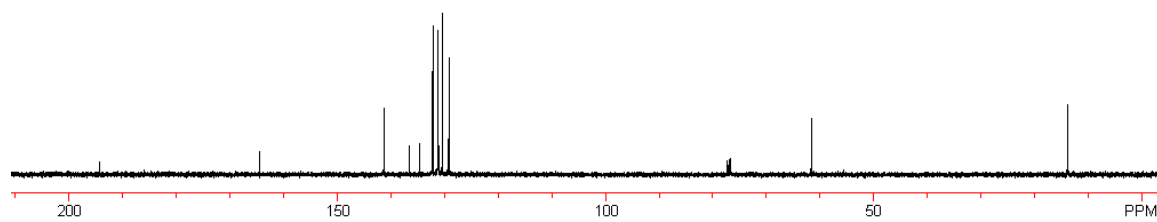

STANDARD 1H OBSERVE

Pulse Sequence: s2pul  
 Solvent: CDCl3  
 Ambient temperature  
 File: kyb-1-51BB  
 INOVA-500 "gamble"

Pulse 46.1 degrees  
 Acq. time 1.638 sec  
 Width 5000.0 Hz  
 18 repetitions  
 OBSERVE H1, 399.7532349 MHz  
 DATA PROCESSING  
 FT size 16384  
 Total time 0 min, 52 sec

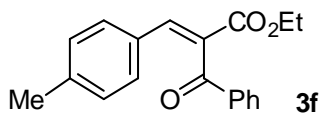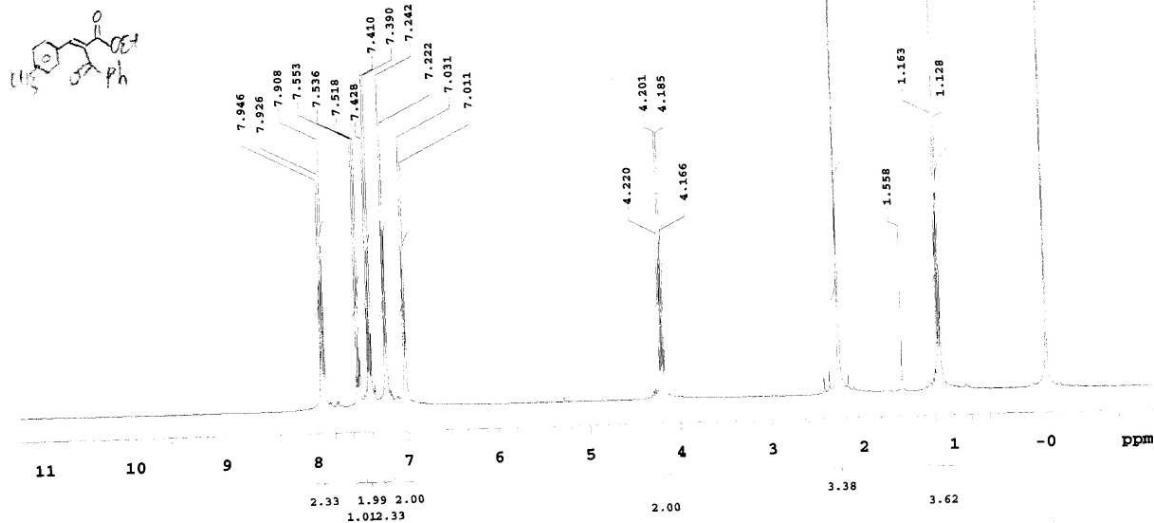

Pulse Sequence: s2pul  
 Solvent: CDCl3  
 Ambient temperature  
 File: kyb-1-51C3  
 INOVA-500 "gamble"

Pulse 53.1 degrees  
 Acq. time 1.199 sec  
 Width 25000.0 Hz  
 284 repetitions  
 OBSERVE C13, 100.5180130 MHz  
 DECOUPLE H1, 399.7552490 MHz  
 Power 37 dB  
 on during acquisition  
 off during delay  
 GARP-1 modulated  
 DATA PROCESSING  
 Line broadening 1.0 Hz  
 FT size 65536  
 Total time 336168 hr, 19 min, 12 sec

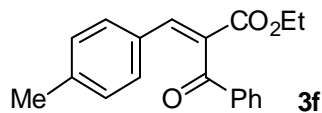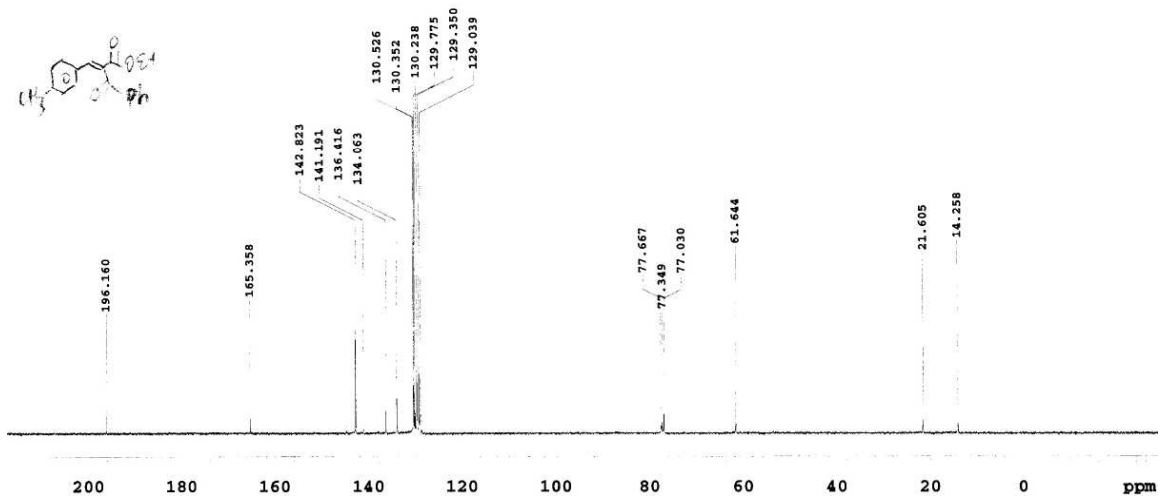

Pulse Sequence: s2pul  
 Solvent: CDCl3  
 Ambient temperature  
 File: kyb-1-127B-better  
 INOVA-500 \*gamble\*

Pulse 46.1 degrees  
 Acq. time 1.638 sec  
 Width 5000.0 Hz  
 20 repetitions  
 OBSERVE H1, 399.7532349 MHz  
 DATA PROCESSING  
 FT size 16384  
 Total time 2 min, 28 sec

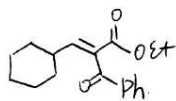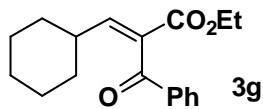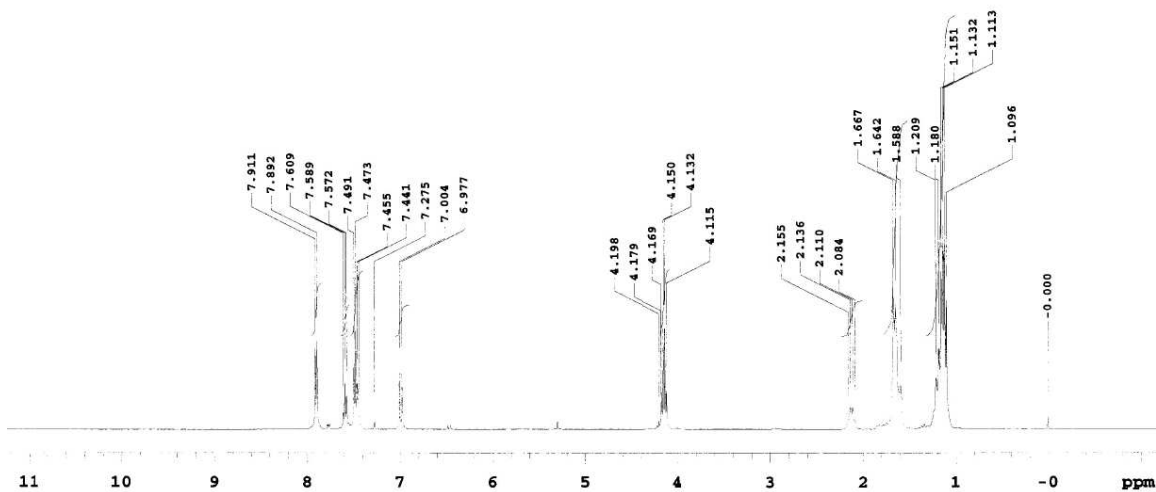

Pulse Sequence: s2pul  
 Solvent: CDCl3  
 Ambient temperature  
 INOVA-400 \*fid\*

Pulse 53.1 degrees  
 Acq. time 1.199 sec  
 Width 25000.0 Hz  
 368 repetitions  
 OBSERVE C13, 100.5180373 MHz  
 DECOUPLE H1, 399.7552472 MHz  
 Power 37 dB  
 on during acquisition  
 off during delay  
 GARP-1 modulated  
 DATA PROCESSING  
 Line broadening 1.0 Hz  
 FT size 65536  
 Total time 33 hr, 33 min, 39 sec

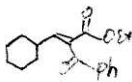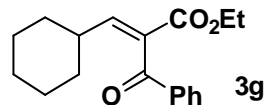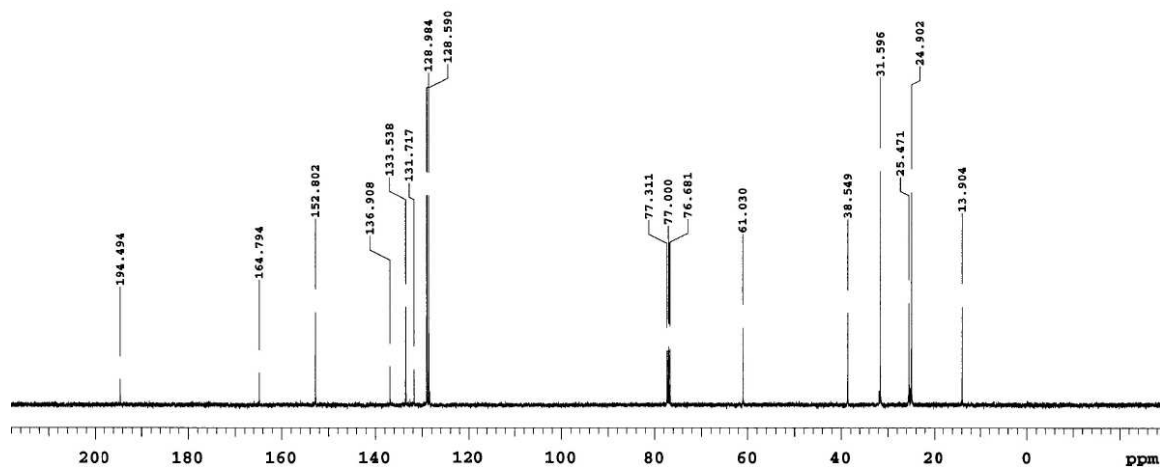

Pulse Sequence: s2pul

Solvent: CDCl3  
Ambient temperature  
File: kyb-1-24-1h  
INOVA-500 "gamble"Pulse 46.1 degrees  
Acq. time 1.638 sec  
Width 5000.0 Hz  
32 repetitions  
OBSERVE H1, 399.7532349 MHz  
DATA PROCESSING  
FT size 16384  
Total time 0 min, 52 sec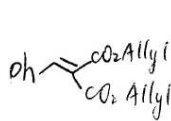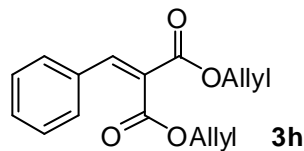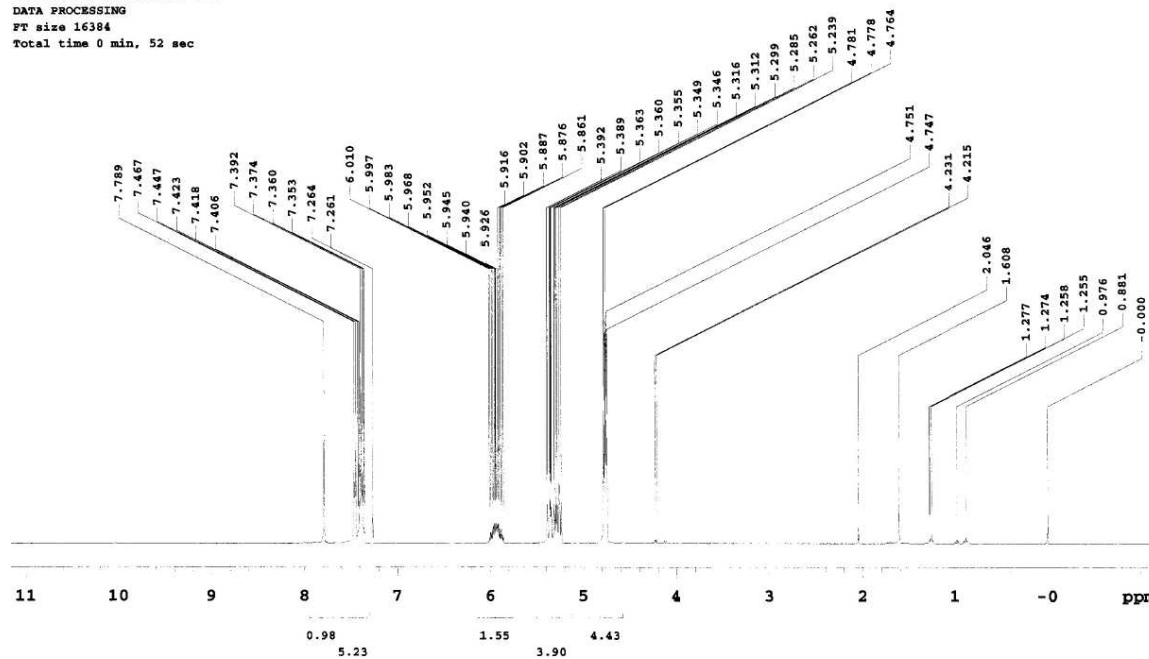

Pulse Sequence: s2pul

Solvent: CDCl3  
Ambient temperature  
File: kyb-1-24CC  
INOVA-500 "gamble"Pulse 53.1 degrees  
Acq. time 1.199 sec  
Width 25000.0 Hz  
322 repetitions  
OBSERVE C13, 100.5180359 MHz  
DECOUPLE H1, 399.7552490 MHz  
Power 37 dB  
on during acquisition  
off during delay  
GARP-1 modulated  
DATA PROCESSING  
Line broadening 1.0 Hz  
FT size 65536  
Total time 336168 hr, 19 min, 12 sec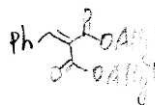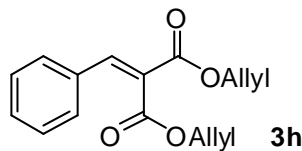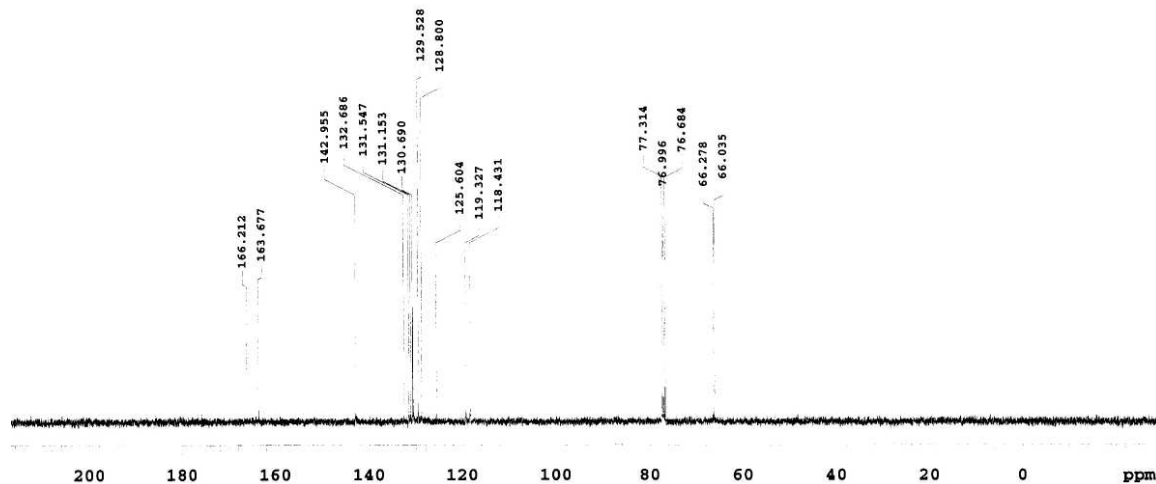



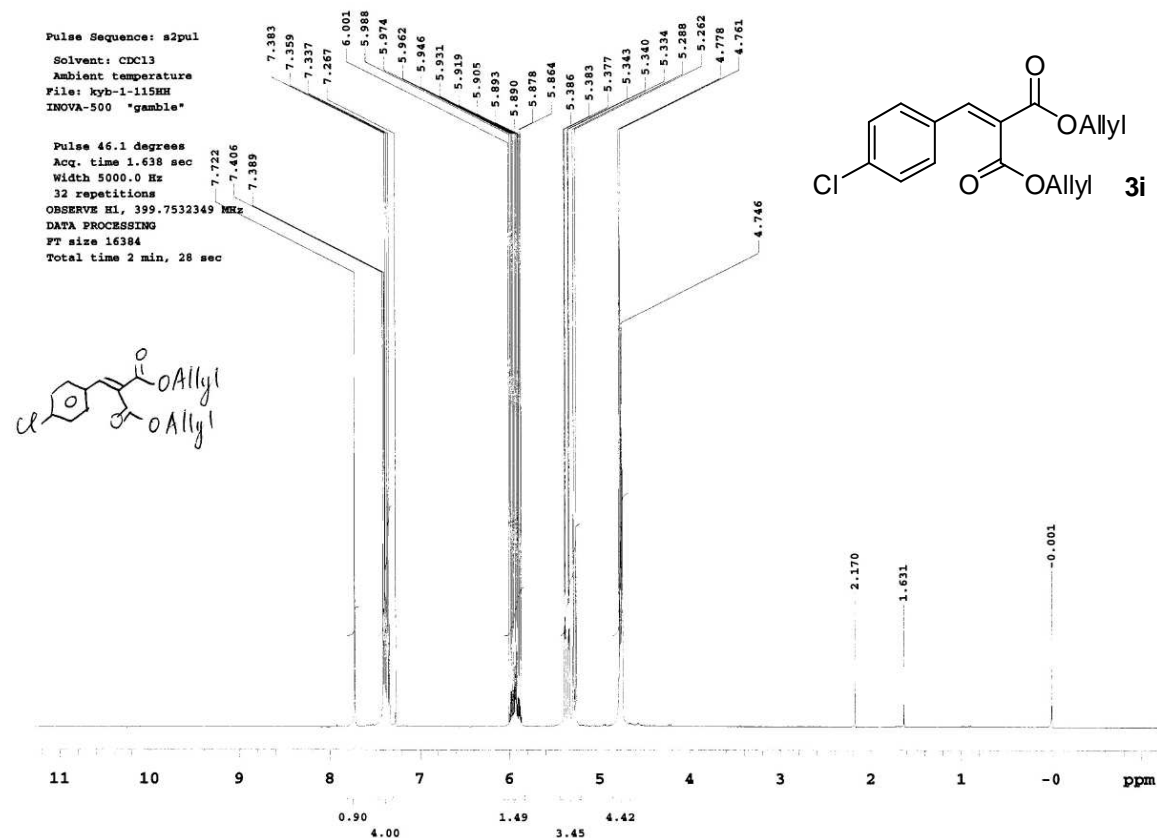

Pulse Sequence: s2pul  
Solvent: CDCl<sub>3</sub>  
Ambient temperature  
INOVA-400 "fid"

Pulse 53.1 degrees  
Acq. time 1.199 sec  
Width 25000.0 Hz  
208 repetitions  
OBSERVE C13, 100.5180373 MHz  
DECOUPLE H1, 399.7552472 MHz  
Power 37 dB  
on during acquisition  
off during delay  
GARP-1 modulated  
DATA PROCESSING  
Line broadening 1.0 Hz  
FT size 65536  
Total time 3356 hr, 7 min, 38 sec

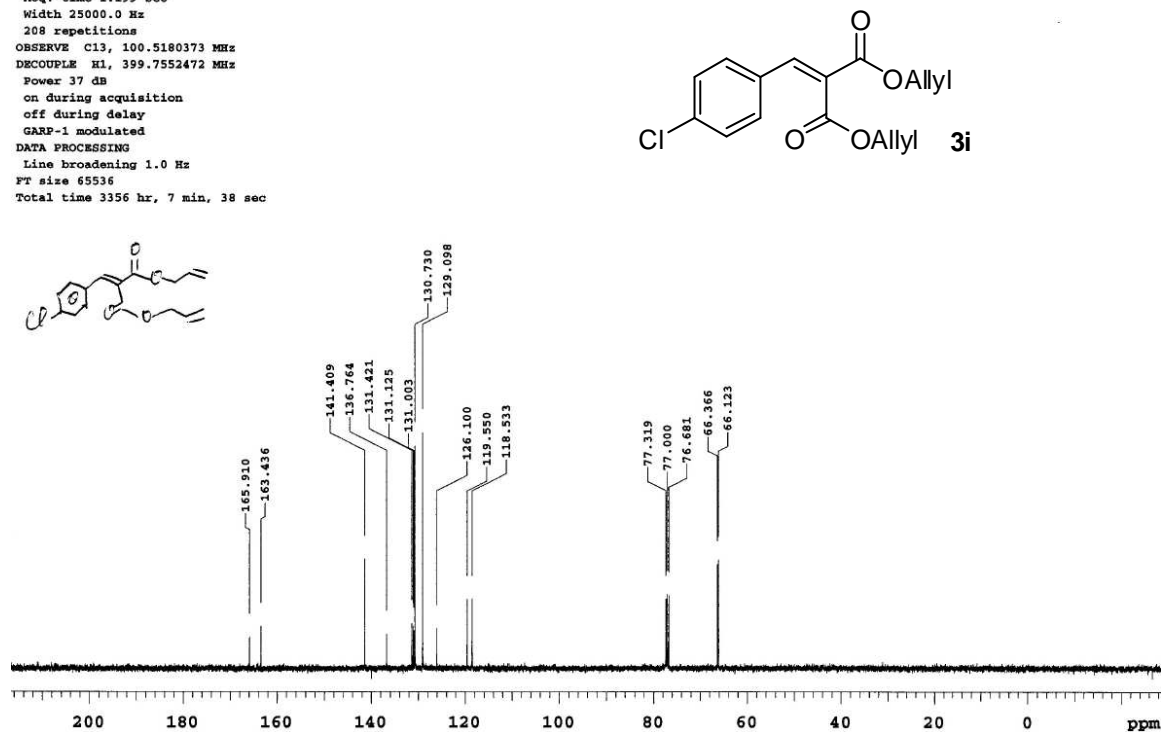

STANDARD 1H OBSERVE

Pulse Sequence: s2pul  
 Solvent: CDCl3  
 Ambient temperature  
 File: kyb-1-42RRH3  
 INOVA-400 "fid"

Pulse 46.1 degrees  
 Acq. time 1.638 sec  
 Width 5000.0 Hz  
 54 repetitions  
 OBSERVE H1, 399.7532391 MHz  
 DATA PROCESSING  
 FT size 16384  
 Total time 1 min, 28 sec

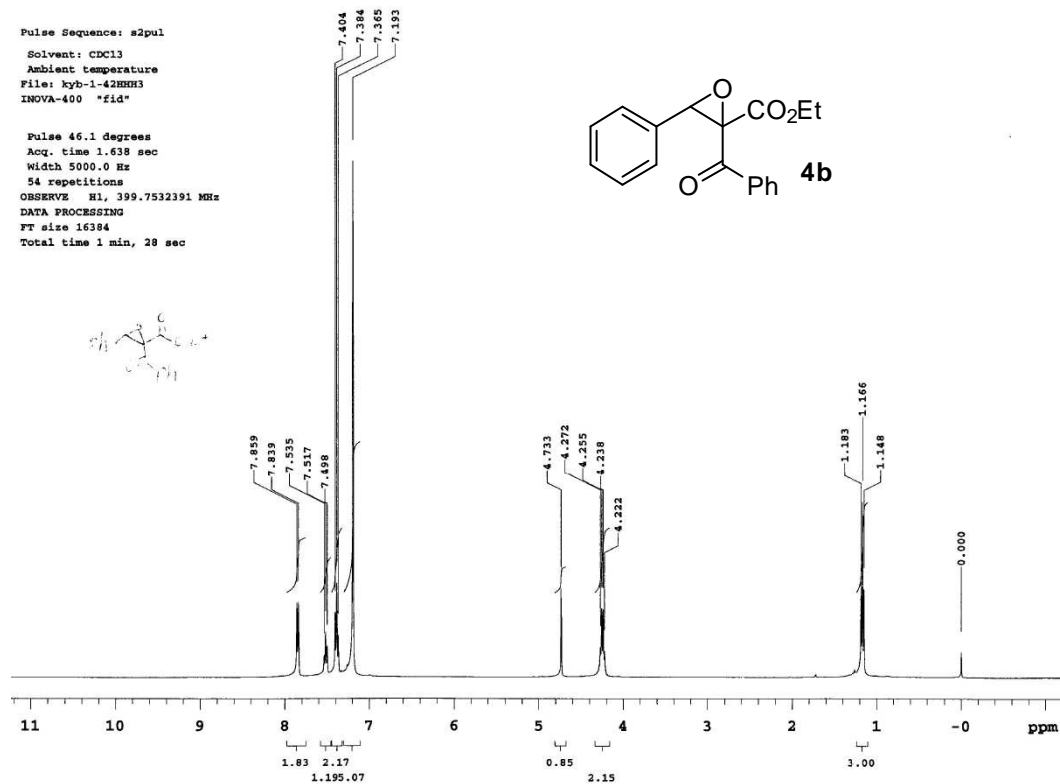

kyb-1-42CC

Pulse Sequence: s2pul  
 Solvent: CDCl3  
 Ambient temperature  
 INOVA-400 "fid"

Pulse 53.1 degrees  
 Acq. time 1.199 sec  
 Width 25000.0 Hz  
 986 repetitions  
 OBSERVE C13, 100.5180441 MHz  
 DECOUPLE H1, 399.7552472 MHz  
 Power 37 dB  
 on during acquisition  
 off during delay  
 GARP-1 modulated  
 DATA PROCESSING  
 FT size 65536  
 Total time 335612 hr, 45 min, 53 sec

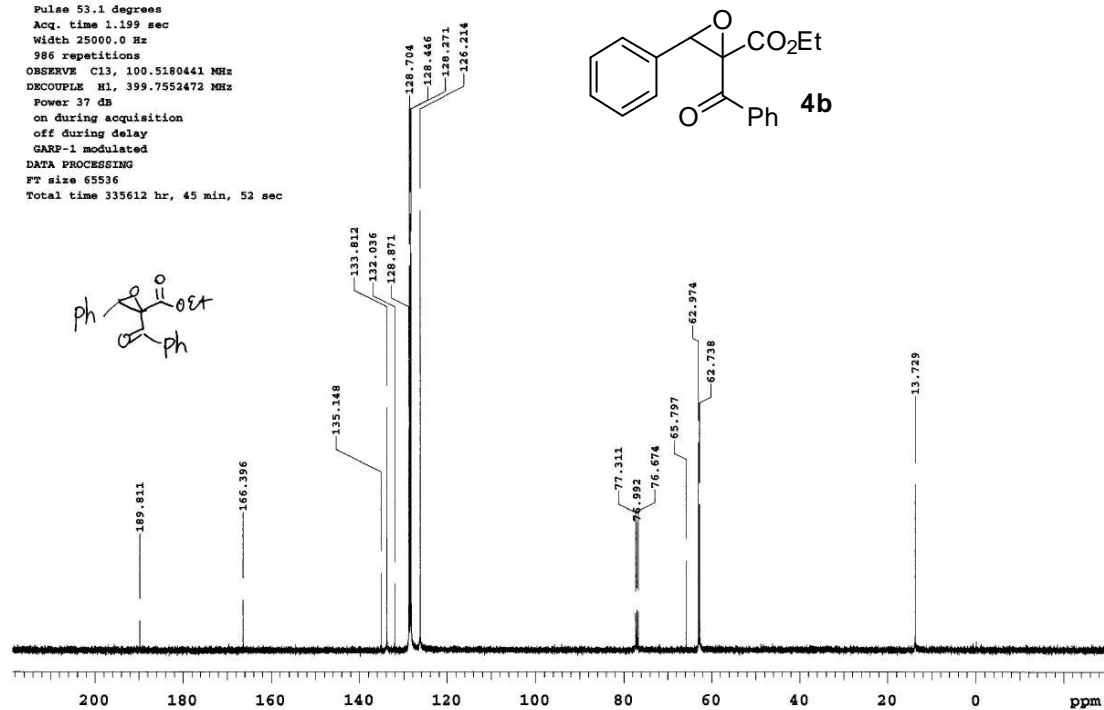

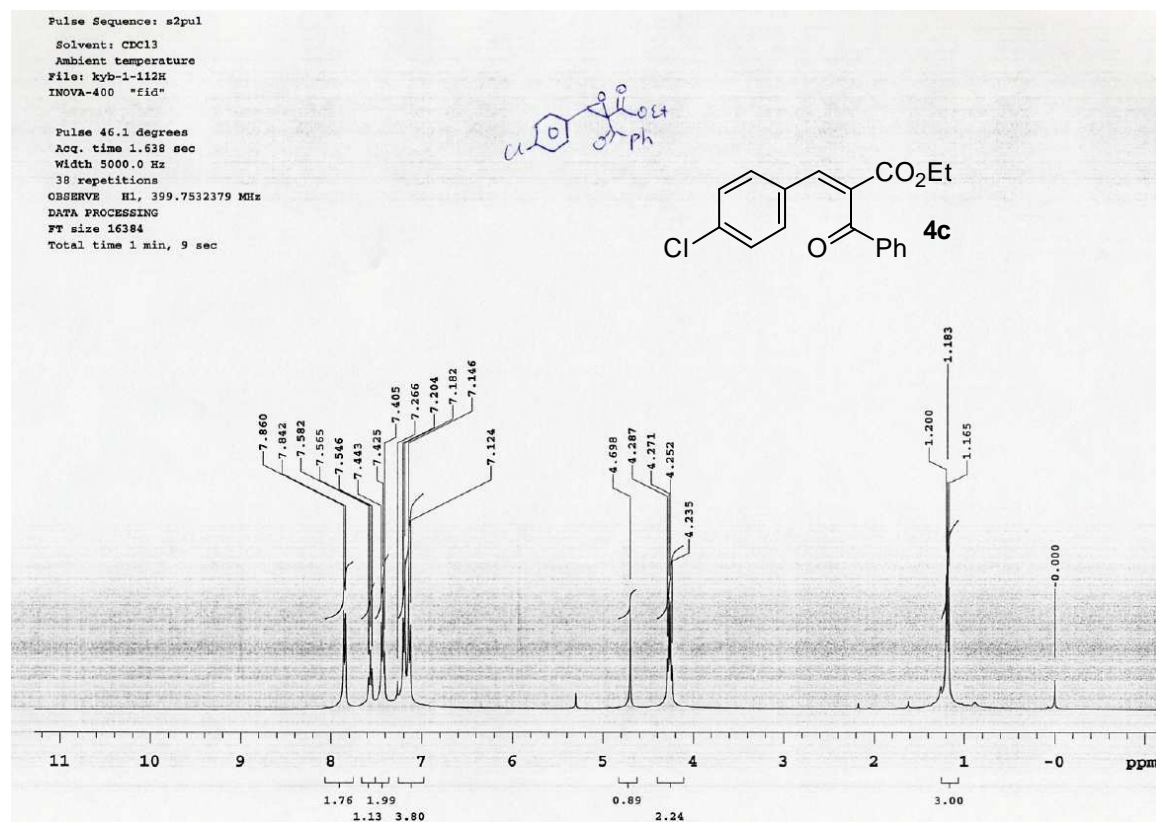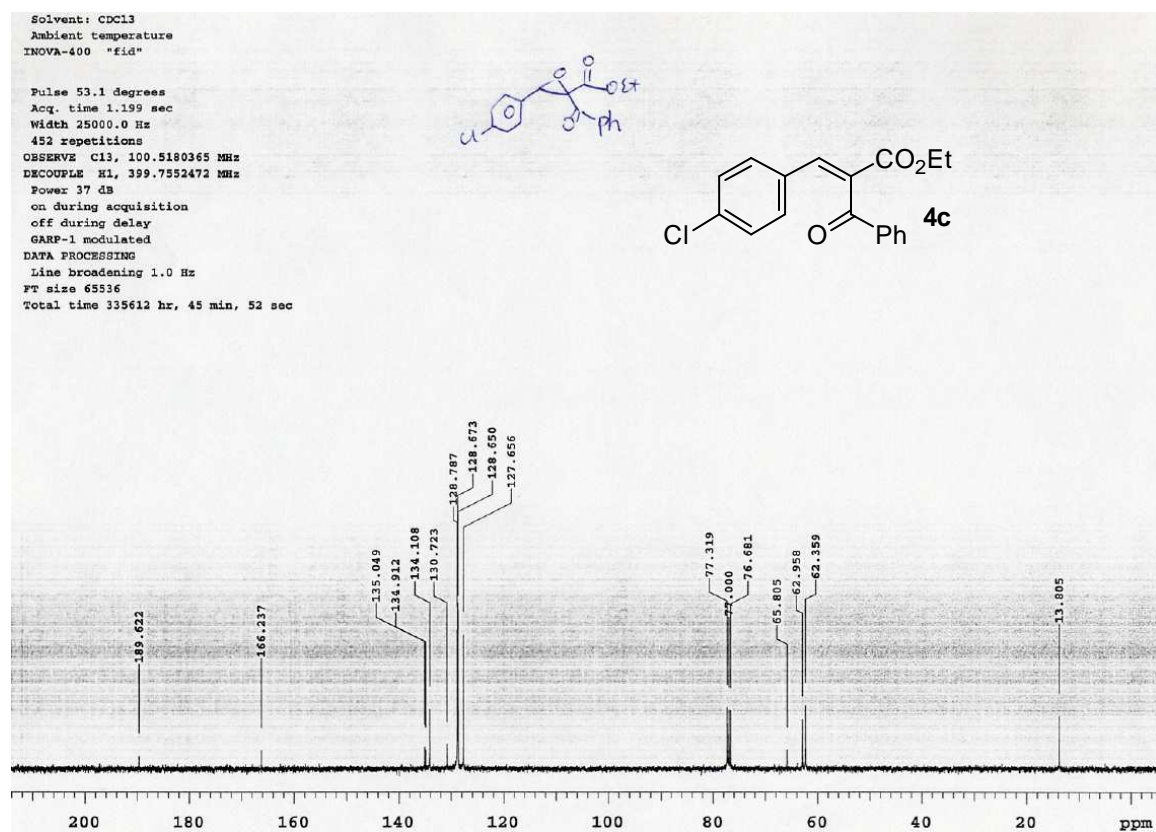

Pulse Sequence: s2pul  
 Solvent: CDCl3  
 Ambient temperature  
 File: kyb-1-98H  
 INOVA-400 \*fid\*

Pulse 46.1 degrees  
 Acq. time 1.638 sec  
 Width 5000.0 Hz  
 42 repetitions  
 OBSERVE H1, 399.7532385 MHz  
 DATA PROCESSING  
 FT size 16384  
 Total time 1 min, 9 sec

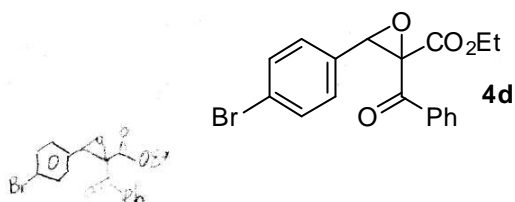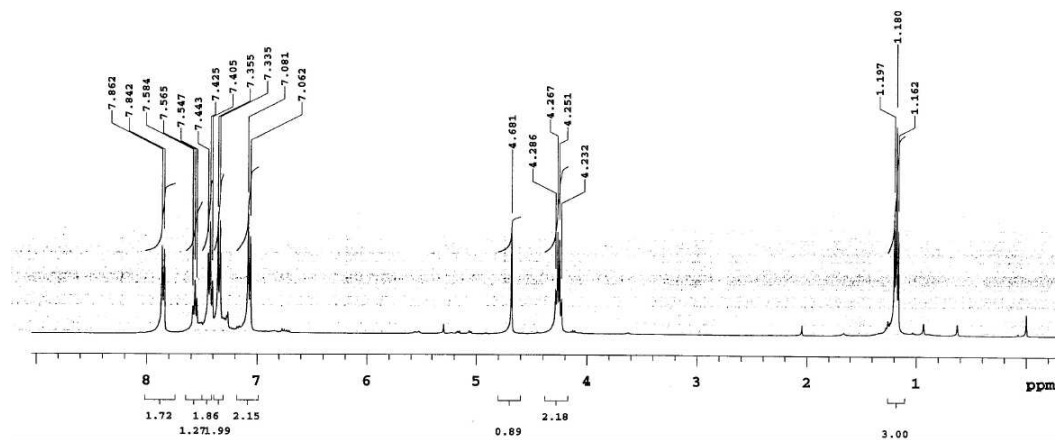

Pulse Sequence: s2pul  
 Solvent: CDCl3  
 Ambient temperature  
 INOVA-400 \*fid\*

Pulse 53.1 degrees  
 Acq. time 1.199 sec  
 Width 25000.0 Hz  
 516 repetitions  
 OBSERVE C13, 100.5180380 MHz  
 DECOUPLE H1, 399.7552472 MHz  
 Power 37 dB  
 on during acquisition  
 off during delay  
 GARP-1 modulated  
 DATA PROCESSING  
 Line broadening 1.0 Hz  
 FT size 65536  
 Total time 335612 hr, 45 min, 52 sec

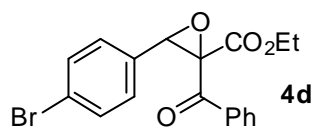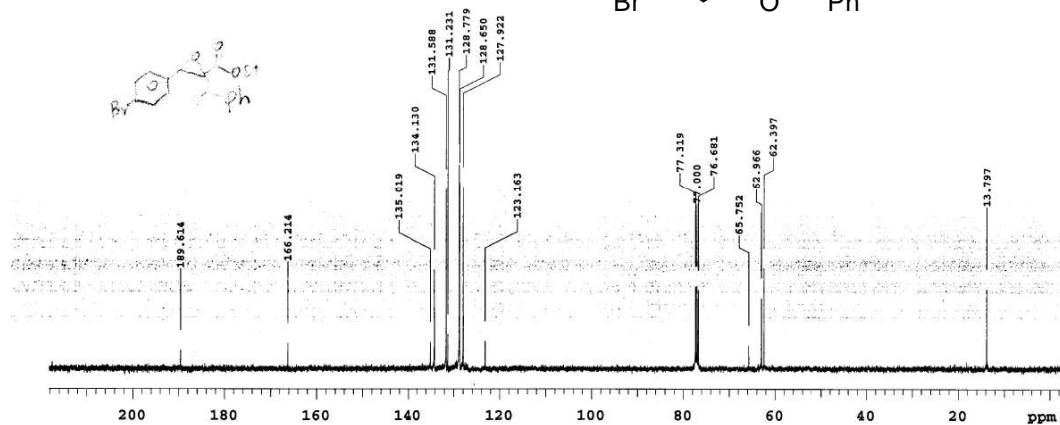

Pulse Sequence: s2pul  
 Solvent: CDCl3  
 Ambient temperature  
 INOVA-400 "fid"

Pulse 46.1 degrees  
 Acq. time 1.638 sec  
 Width 5000.0 Hz  
 42 repetitions  
 OBSERVE H1, 399.7532379 MHz  
 DATA PROCESSING  
 FT size 16384  
 Total time 1 min, 9 sec

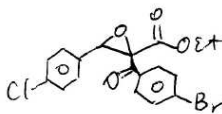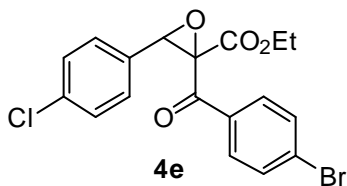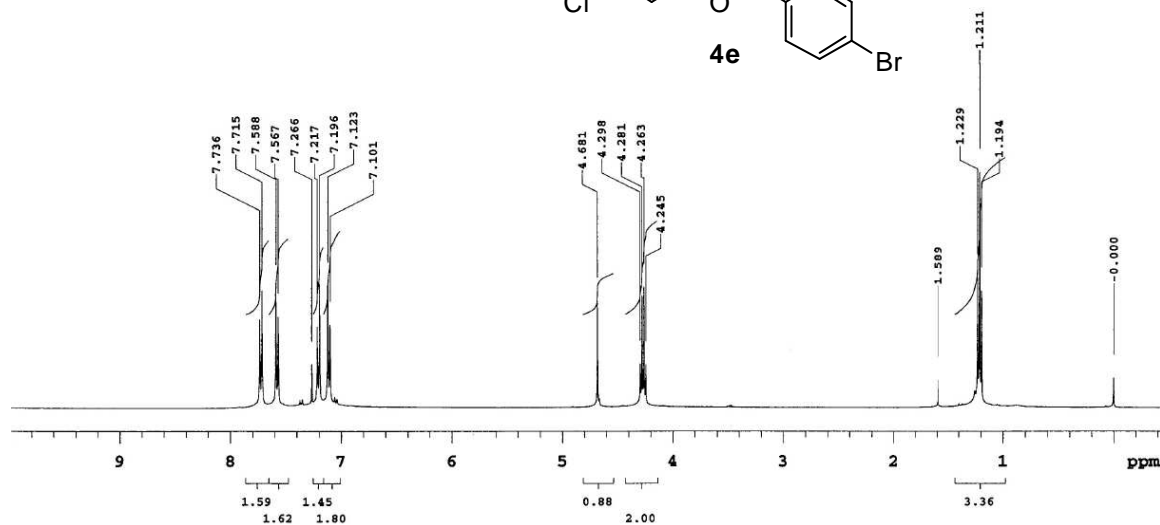

Pulse Sequence: s2pul  
 Solvent: CDCl3  
 Ambient temperature  
 INOVA-400 "fid"

Pulse 53.1 degrees  
 Acq. time 1.199 sec  
 Width 25000.0 Hz  
 974 repetitions  
 OBSERVE C13, 100.5180350 MHz  
 DECOUPLE H1, 399.7552472 MHz  
 Power 37 dB  
 on during acquisition  
 off during delay  
 GARP-1 modulated  
 DATA PROCESSING  
 Line broadening 1.0 Hz  
 FT size 65536  
 Total time 335612 hr, 45 min, 52 sec

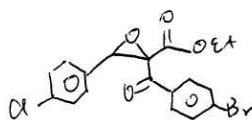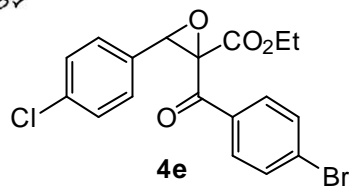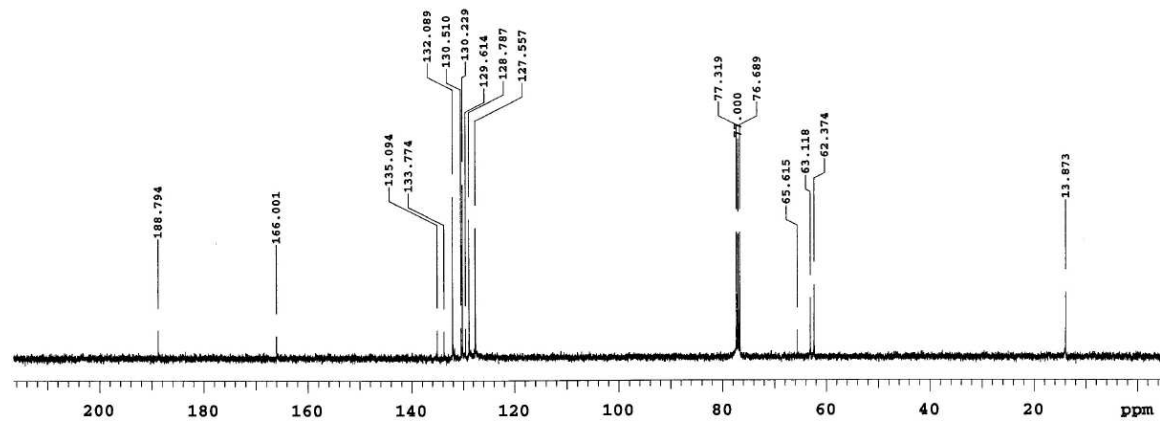

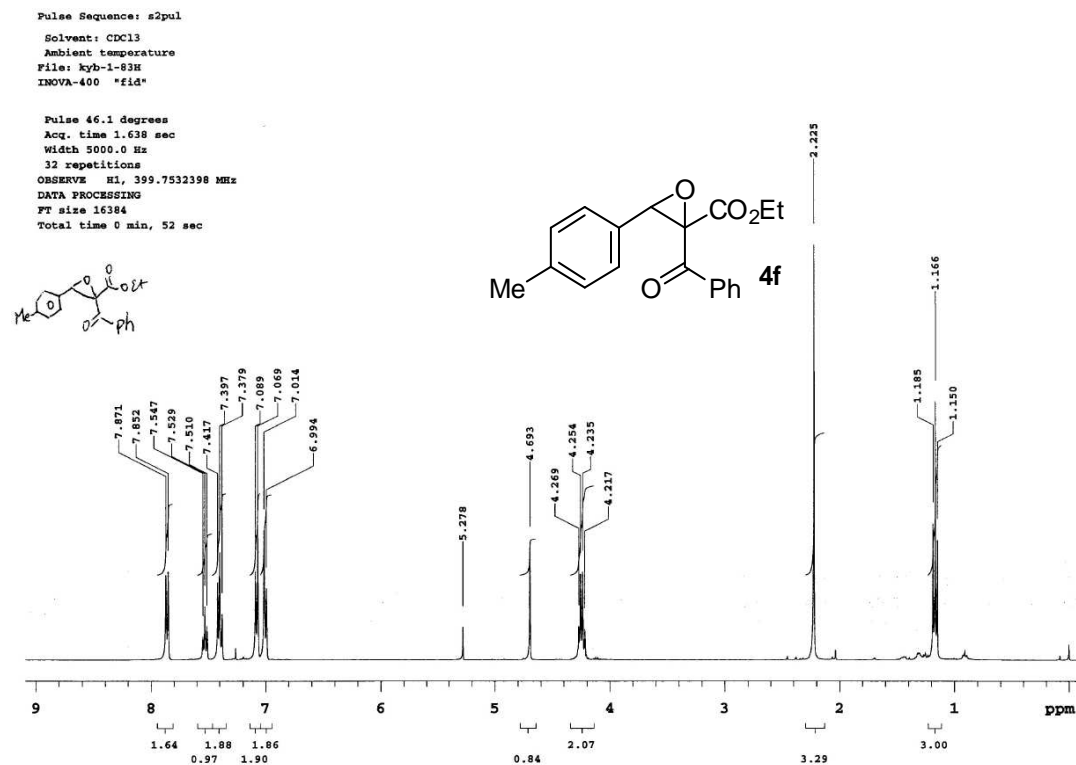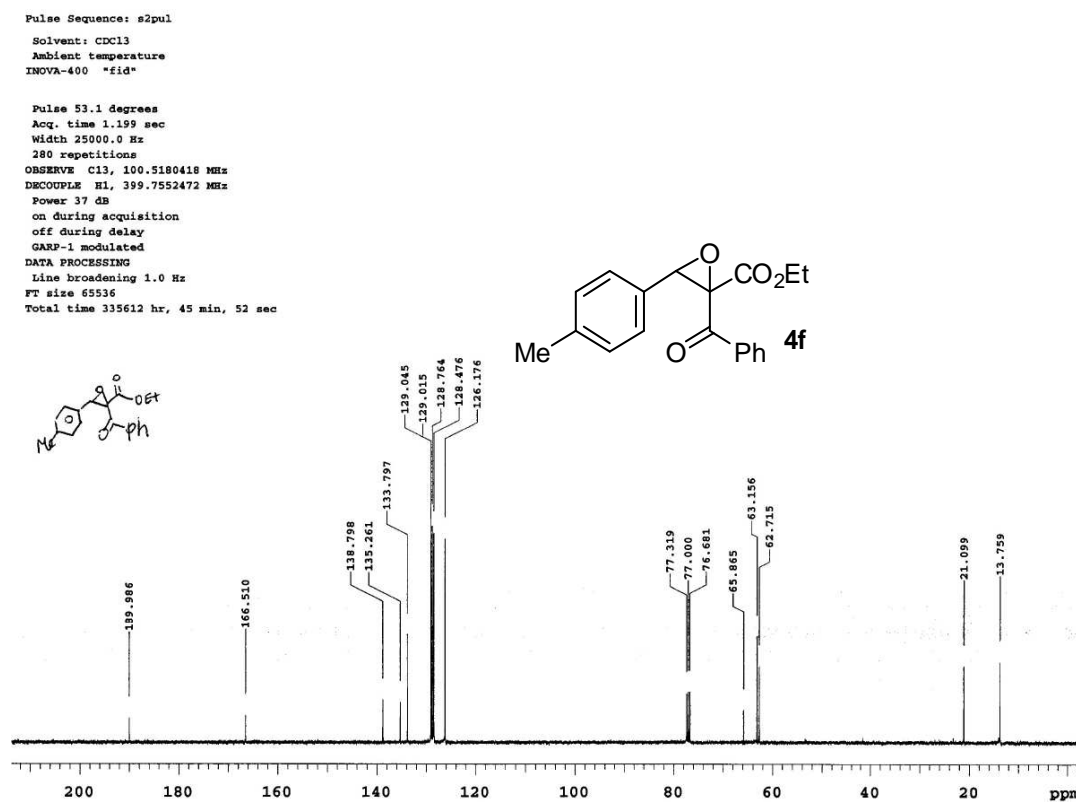

Pulse Sequence: s2pul

Solvent: CDCl3

Ambient temperature

File: kyb-1-128H

INOVA-400 \*fid\*

Pulse 46.1 degrees  
 Acq. time 1.638 sec  
 Width 5000.0 Hz  
 36 repetitions  
 OBSERVE H1, 399.7532367 MHz  
 DATA PROCESSING  
 FT size 16384  
 Total time 2 min, 28 sec

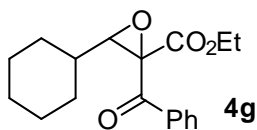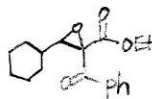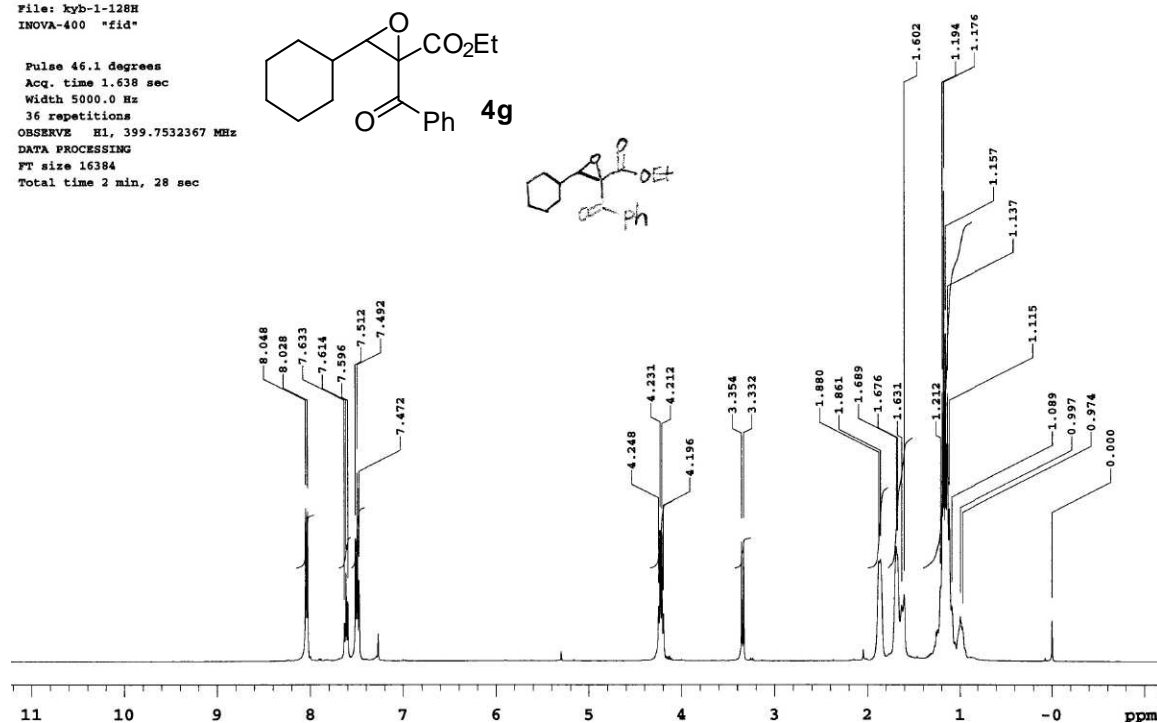

Pulse Sequence: s2pul

Solvent: CDCl3

Ambient temperature

INOVA-400 \*fid\*

Pulse 53.1 degrees  
 Acq. time 1.199 sec  
 Width 25000.0 Hz  
 236 repetitions  
 OBSERVE C13, 100.5180357 MHz  
 DECOUPLE H1, 399.7552472 MHz  
 Power 37 dB  
 on during acquisition  
 off during delay  
 GARP-1 modulated  
 DATA PROCESSING  
 Line broadening 1.0 Hz  
 FT size 65536  
 Total time 335612 hr, 45 min, 52 sec

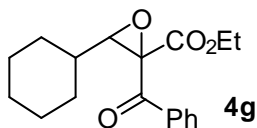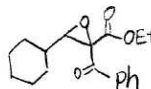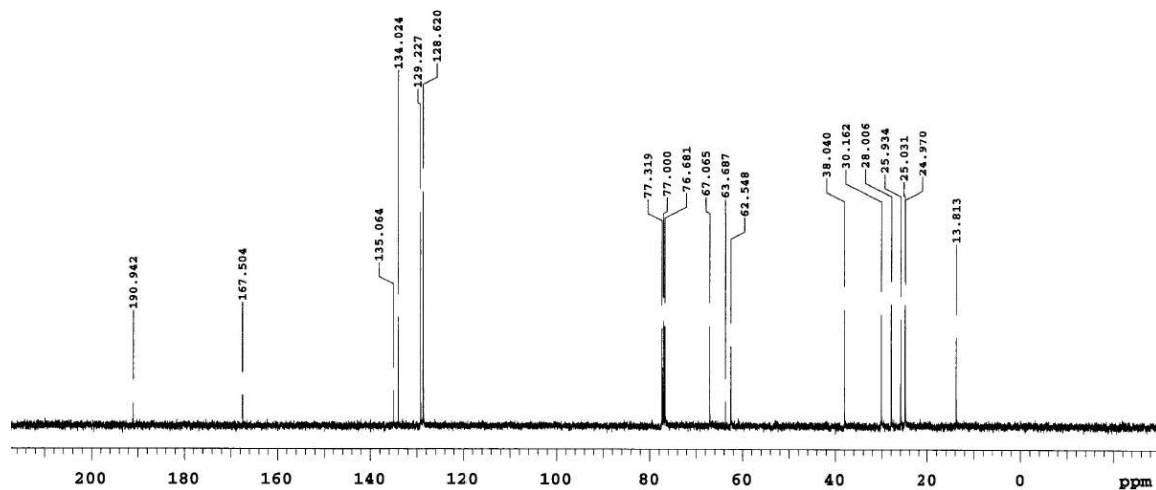

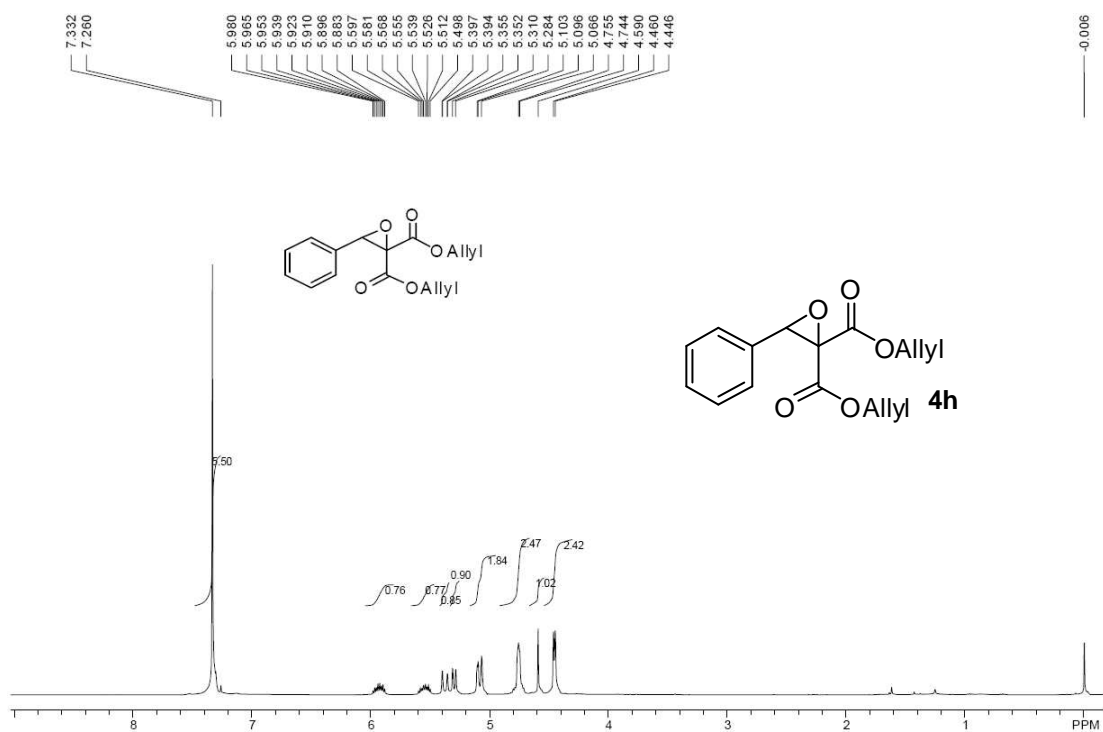

Pulse Sequence: s2pul  
Solvent: CDCl3  
Ambient temperature  
INOVA-400 \*fid\*

Pulse 53.1 degrees  
Acq. time 1.199 sec  
Width 25000.0 Hz  
298 repetitions  
OBSERVE C13, 100.5180365 MHz  
DECOUPLE H1, 399.7552472 MHz  
Power 37 dB  
on during acquisition  
off during delay  
GARP-1 modulated  
DATA PROCESSING  
Line broadening 1.0 Hz  
FT size 65536  
Total time 335612 hr, 45 min, 52 sec

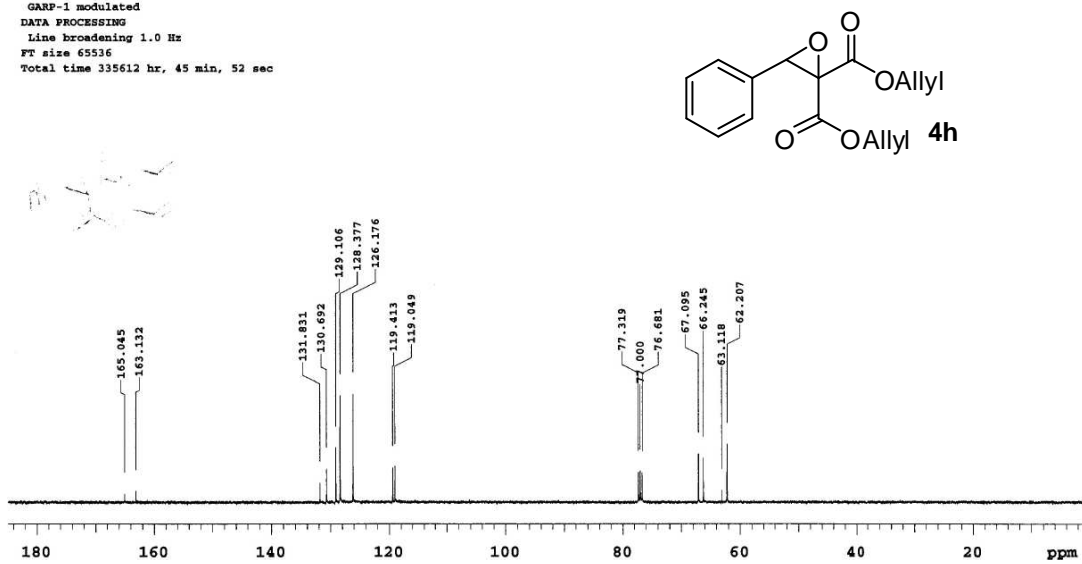



STANDARD 1H OBSERVE

Pulse Sequence: s2pul

Solvent: CDCl3  
Temp. 24.0 C / 297.1 K  
File: kyb-1-121H  
INOVA-400 "fid"Pulse 46.1 degrees  
Acq. time 1.638 sec  
Width 5000.0 Hz  
46 repetitions  
OBSERVE H1, 399.7532379 MHz  
DATA PROCESSING  
FT size 16384  
Total time 2 min, 28 sec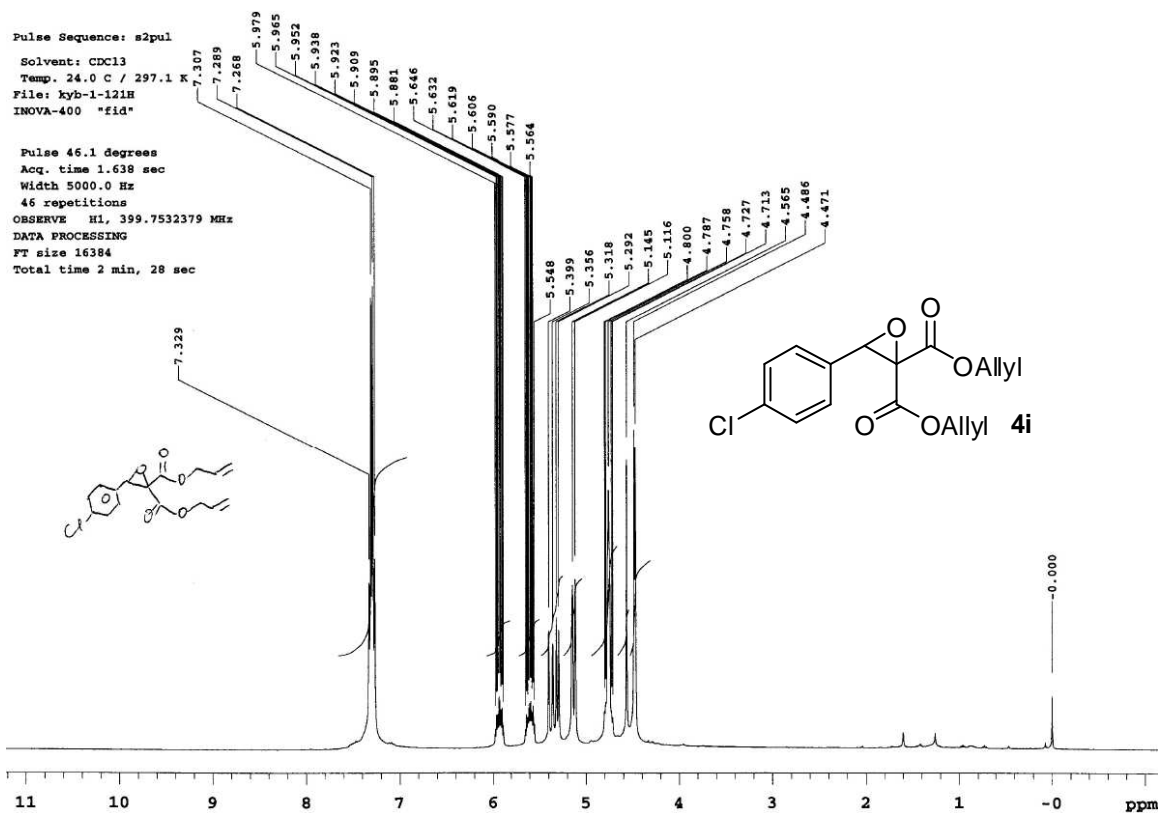

Pulse Sequence: s2pul

Solvent: CDCl3  
Temp. 24.0 C / 297.1 K  
File: kyb-1-121C2  
INOVA-400 "fid"Pulse 53.1 degrees  
Acq. time 1.199 sec  
Width 25000.0 Hz  
274 repetitions  
OBSERVE C13, 100.5180350 MHz  
DECOUPLE H1, 399.7552472 MHz  
Power 37 dB  
on during acquisition  
off during delay  
GARP-1 modulated  
DATA PROCESSING  
Line broadening 1.0 Hz  
FT size 65536  
Total time 3356 hr, 7 min, 38 sec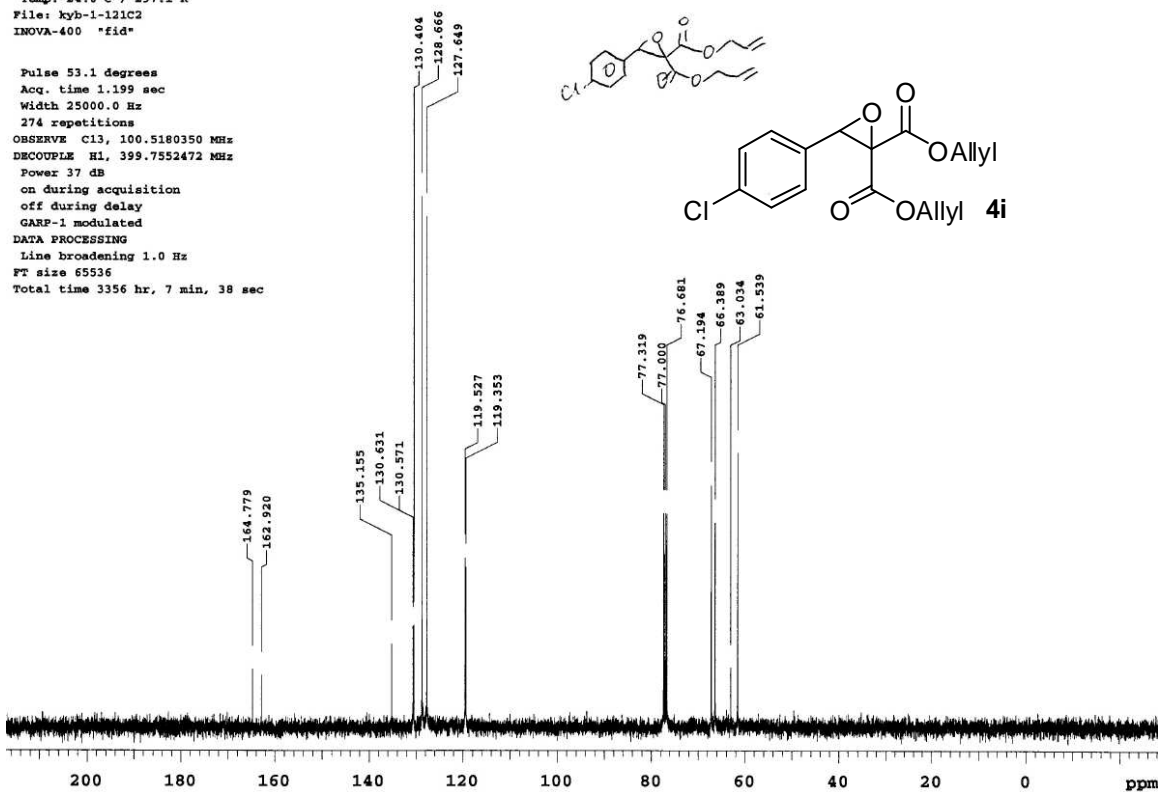

## HPLC Spectra for 4b-i

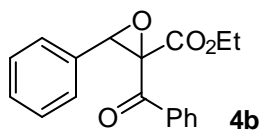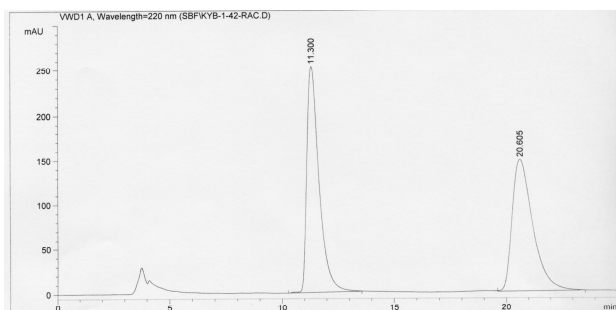

## Area Percent Report

Sorted By : Signal  
Multiplier : 1.0000  
Dilution : 1.0000  
Sample Amount : 1.00000 [ng/ul] (not used in calc.)  
Use Multiplier & Dilution Factor with ISTDs

Signal 1: VWD1 A, Wavelength=220 nm

| Peak # | RetTime [min] | Type | Width [min] | Area mAU   | Height *s | Area [mAU] | Area % |
|--------|---------------|------|-------------|------------|-----------|------------|--------|
| 1      | 11.300        | BB   | 0.5769      | 9596.76465 | 251.96046 | 50.3129    |        |
| 2      | 20.605        | BB   | 0.9817      | 9477.41504 | 147.38446 | 49.6871    |        |

Totals : 1.9074264 399.34492

\*\*\* End of Report \*\*\*

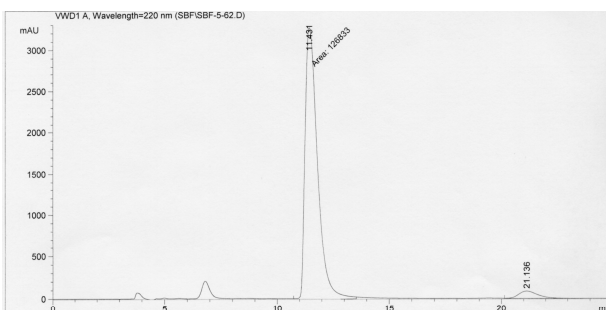

## Area Percent Report

Sorted By : Signal  
Multiplier : 1.0000  
Dilution : 1.0000  
Sample Amount : 1.00000 [ng/ul] (not used in calc.)  
Use Multiplier & Dilution Factor with ISTDs

Signal 1: VWD1 A, Wavelength=220 nm

| Peak # | RetTime [min] | Type | Width [min] | Area mAU   | Height *s  | Area [mAU] | Area % |
|--------|---------------|------|-------------|------------|------------|------------|--------|
| 1      | 11.431        | MM   | 0.6458      | 1.26833e5  | 3273.21777 | 96.1816    |        |
| 2      | 21.136        | VB   | 0.9090      | 5035.32178 | 84.35349   | 3.8184     |        |

Totals : 1.31869e5 3357.57126

\*\*\* End of Report \*\*\*

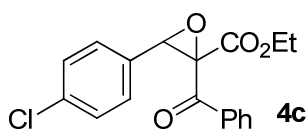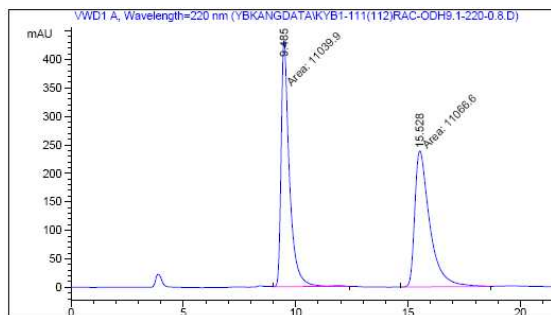

## Area Percent Report

Sorted By : Signal  
Multiplier : 1.0000  
Dilution : 1.0000  
Use Multiplier & Dilution Factor with ISTDs

Signal 1: VWD1 A, Wavelength=220 nm

| Peak # | RetTime [min] | Type | Width [min] | Area mAU  | Height *s | Area [mAU] | Area % |
|--------|---------------|------|-------------|-----------|-----------|------------|--------|
| 1      | 9.485         | MM   | 0.4256      | 1.10399e4 | 432.37308 | 49.9397    |        |
| 2      | 15.528        | MM   | 0.7726      | 1.10666e4 | 238.73206 | 50.0603    |        |

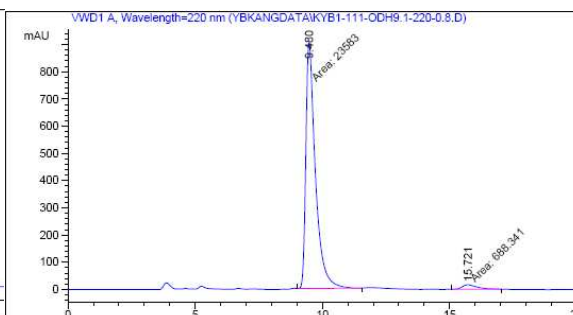

## Area Percent Report

Sorted By : Signal  
Multiplier : 1.0000  
Dilution : 1.0000  
Use Multiplier & Dilution Factor with ISTDs

Signal 1: VWD1 A, Wavelength=220 nm

| Peak # | RetTime [min] | Type | Width [min] | Area mAU  | Height *s | Area [mAU] | Area % |
|--------|---------------|------|-------------|-----------|-----------|------------|--------|
| 1      | 9.480         | MM   | 0.4343      | 2.35830e4 | 905.00415 | 97.1640    |        |
| 2      | 15.721        | MM   | 0.6867      | 688.34058 | 16.70532  | 2.8360     |        |

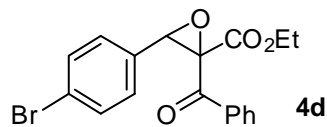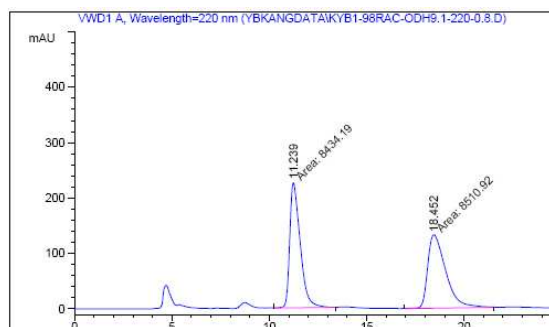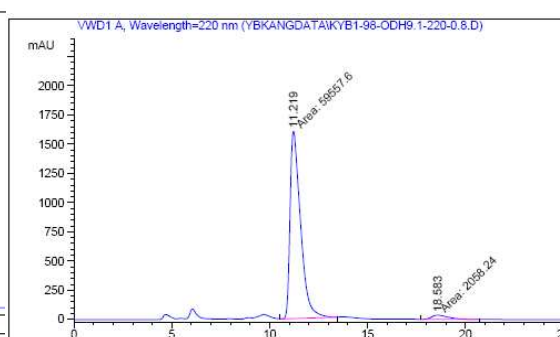

Area Percent Report

Sorted By : Signal  
Multiplier : 1.0000  
Dilution : 1.0000  
Use Multiplier & Dilution Factor with ISTDs

Signal 1: VWD1 A, Wavelength=220 nm

| Peak # | RetTime [min] | Type | Width [min] | Area mAU *s | Height [mAU] | Area %  |
|--------|---------------|------|-------------|-------------|--------------|---------|
| 1      | 11.239        | MM   | 0.6217      | 8434.19336  | 226.11493    | 49.7736 |
| 2      | 18.452        | MM   | 1.0698      | 8510.92188  | 132.58762    | 50.2264 |

Area Percent Report

Sorted By : Signal  
Multiplier : 1.0000  
Dilution : 1.0000  
Use Multiplier & Dilution Factor with ISTDs

Signal 1: VWD1 A, Wavelength=220 nm

| Peak # | RetTime [min] | Type | Width [min] | Area mAU *s | Height [mAU] | Area %  |
|--------|---------------|------|-------------|-------------|--------------|---------|
| 1      | 11.219        | MM   | 0.6177      | 5.95576e4   | 1607.08411   | 96.6596 |
| 2      | 18.583        | MM   | 0.9654      | 2058.24268  | 35.53361     | 3.3404  |

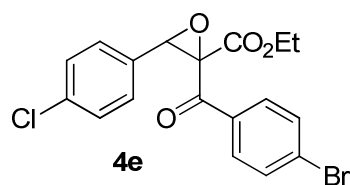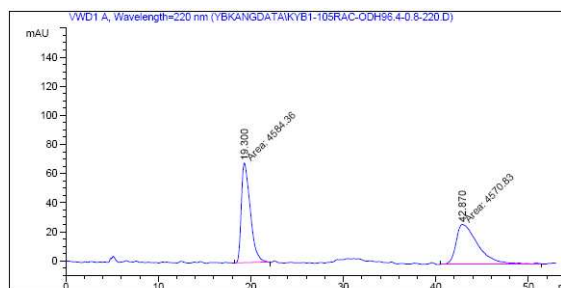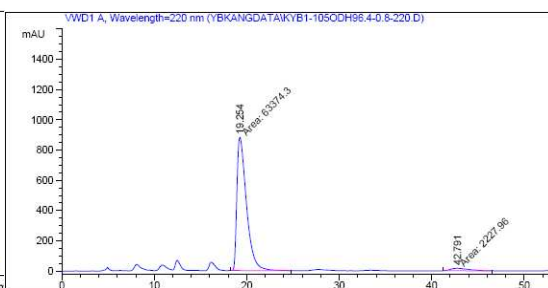

Area Percent Report

Sorted By : Signal  
Multiplier : 1.0000  
Dilution : 1.0000  
Use Multiplier & Dilution Factor with ISTDs

Signal 1: VWD1 A, Wavelength=220 nm

| Peak # | RetTime [min] | Type | Width [min] | Area mAU *s | Height [mAU] | Area %  |
|--------|---------------|------|-------------|-------------|--------------|---------|
| 1      | 19.300        | MM   | 1.1136      | 4584.35693  | 68.61414     | 50.0739 |
| 2      | 42.870        | MM   | 2.7815      | 4570.82715  | 27.38843     | 49.9261 |

Area Percent Report

Sorted By : Signal  
Multiplier : 1.0000  
Dilution : 1.0000  
Use Multiplier & Dilution Factor with ISTDs

Signal 1: VWD1 A, Wavelength=220 nm

| Peak # | RetTime [min] | Type | Width [min] | Area mAU *s | Height [mAU] | Area %  |
|--------|---------------|------|-------------|-------------|--------------|---------|
| 1      | 19.254        | MM   | 1.1991      | 6.33743e4   | 880.87677    | 96.6038 |
| 2      | 42.791        | MM   | 2.2990      | 2227.96313  | 16.15156     | 3.3962  |

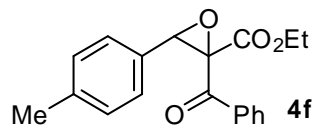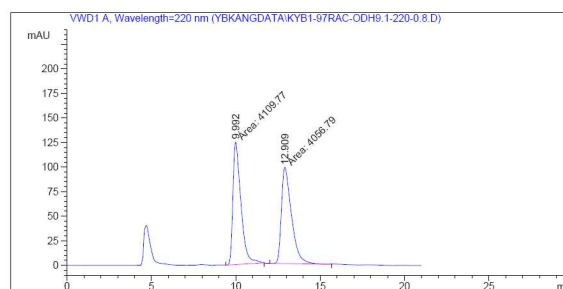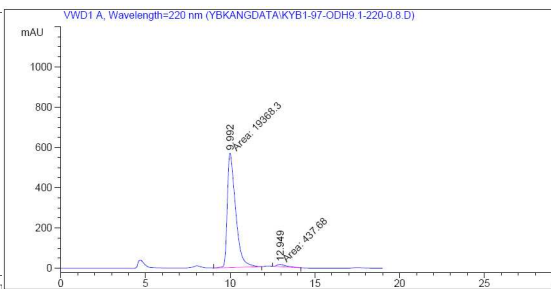

## Area Percent Report

Sorted By : Signal  
Multiplier : 1.0000  
Dilution : 1.0000  
Use Multiplier & Dilution Factor with ISTDs

Signal 1: VWD1 A, Wavelength=220 nm

| Peak # | RetTime [min] | Type | Width [min] | Area mAU *s | Height [mAU] | Area %  |
|--------|---------------|------|-------------|-------------|--------------|---------|
| 1      | 9.992         | MM   | 0.5487      | 4109.76953  | 124.84371    | 50.3244 |
| 2      | 12.909        | MM   | 0.6898      | 4056.78760  | 98.02475     | 49.6756 |

## Area Percent Report

Sorted By : Signal  
Multiplier : 1.0000  
Dilution : 1.0000  
Use Multiplier & Dilution Factor with ISTDs

Signal 1: VWD1 A, Wavelength=220 nm

| Peak # | RetTime [min] | Type | Width [min] | Area mAU *s | Height [mAU] | Area %  |
|--------|---------------|------|-------------|-------------|--------------|---------|
| 1      | 9.992         | MM   | 0.5667      | 1.93683e4   | 569.64313    | 97.7902 |
| 2      | 12.949        | MM   | 0.6366      | 437.67972   | 11.45819     | 2.2098  |

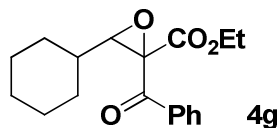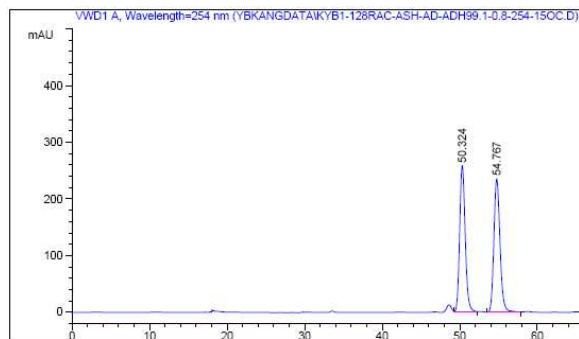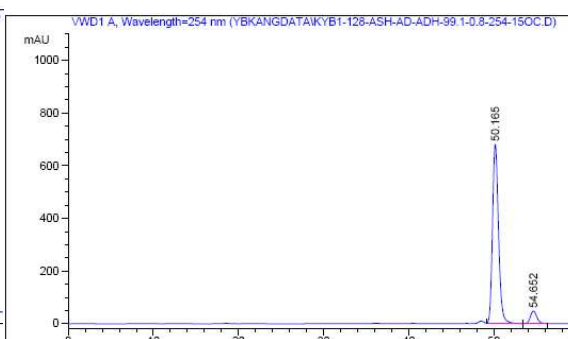

## Area Percent Report

Sorted By : Signal  
Multiplier : 1.0000  
Dilution : 1.0000  
Use Multiplier & Dilution Factor with ISTDs

Signal 1: VWD1 A, Wavelength=254 nm

| Peak # | RetTime [min] | Type | Width [min] | Area mAU *s | Height [mAU] | Area %  |
|--------|---------------|------|-------------|-------------|--------------|---------|
| 1      | 50.324        | VV   | 0.7735      | 1.30278e4   | 258.87851    | 49.9211 |
| 2      | 54.767        | VV   | 0.8571      | 1.30689e4   | 235.49992    | 50.0789 |

## Area Percent Report

Sorted By : Signal  
Multiplier : 1.0000  
Dilution : 1.0000  
Use Multiplier & Dilution Factor with ISTDs

Signal 1: VWD1 A, Wavelength=254 nm

| Peak # | RetTime [min] | Type | Width [min] | Area mAU *s | Height [mAU] | Area %  |
|--------|---------------|------|-------------|-------------|--------------|---------|
| 1      | 50.165        | VV   | 0.7617      | 3.35428e4   | 680.19843    | 92.8466 |
| 2      | 54.652        | VV   | 0.8244      | 2584.33081  | 48.13493     | 7.1534  |

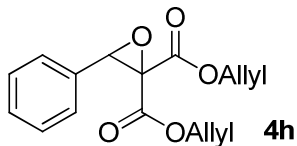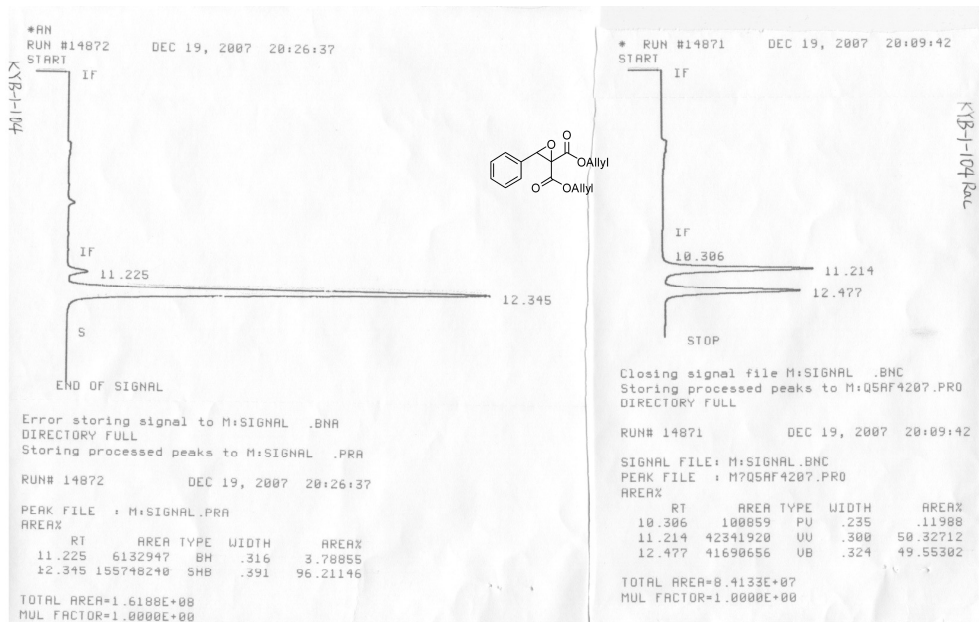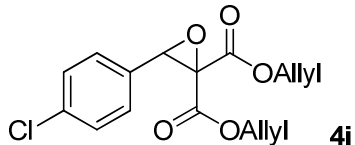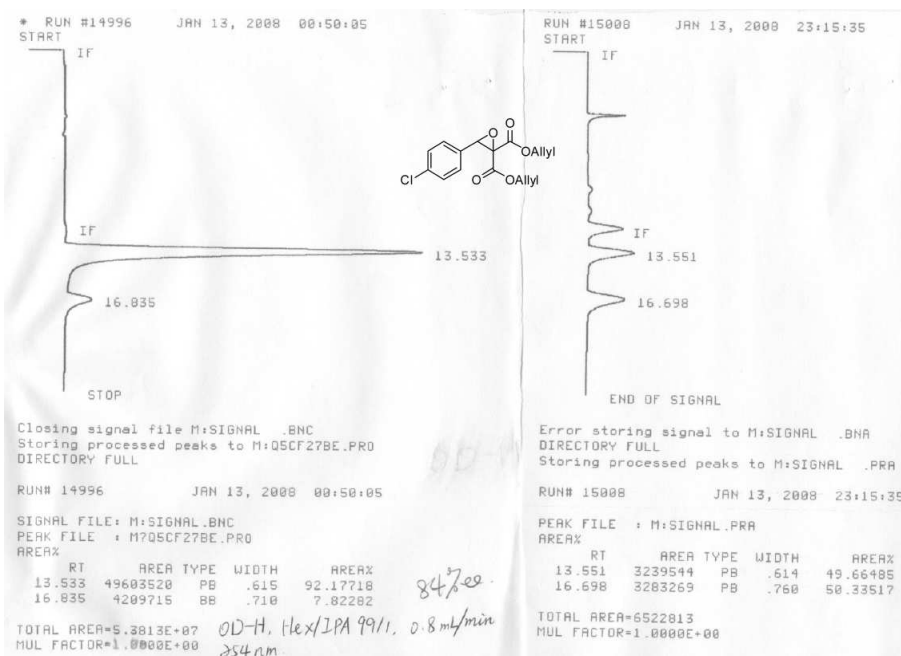

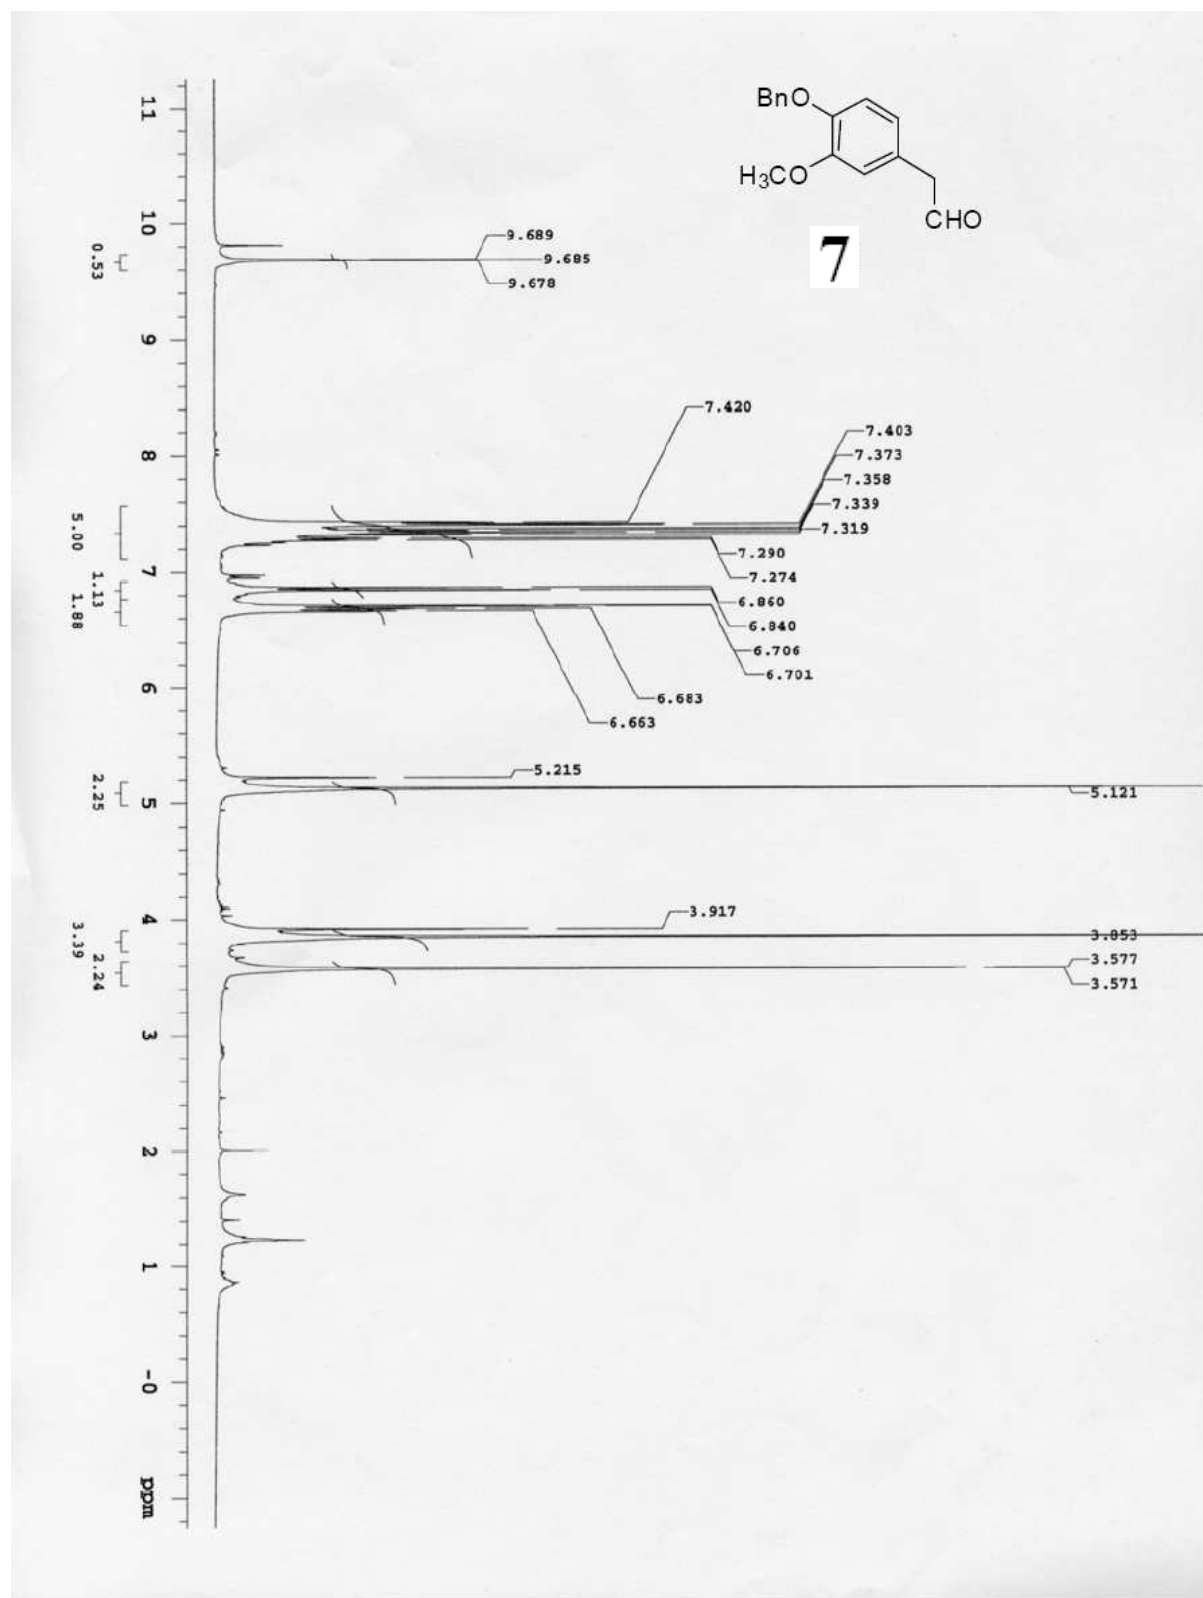

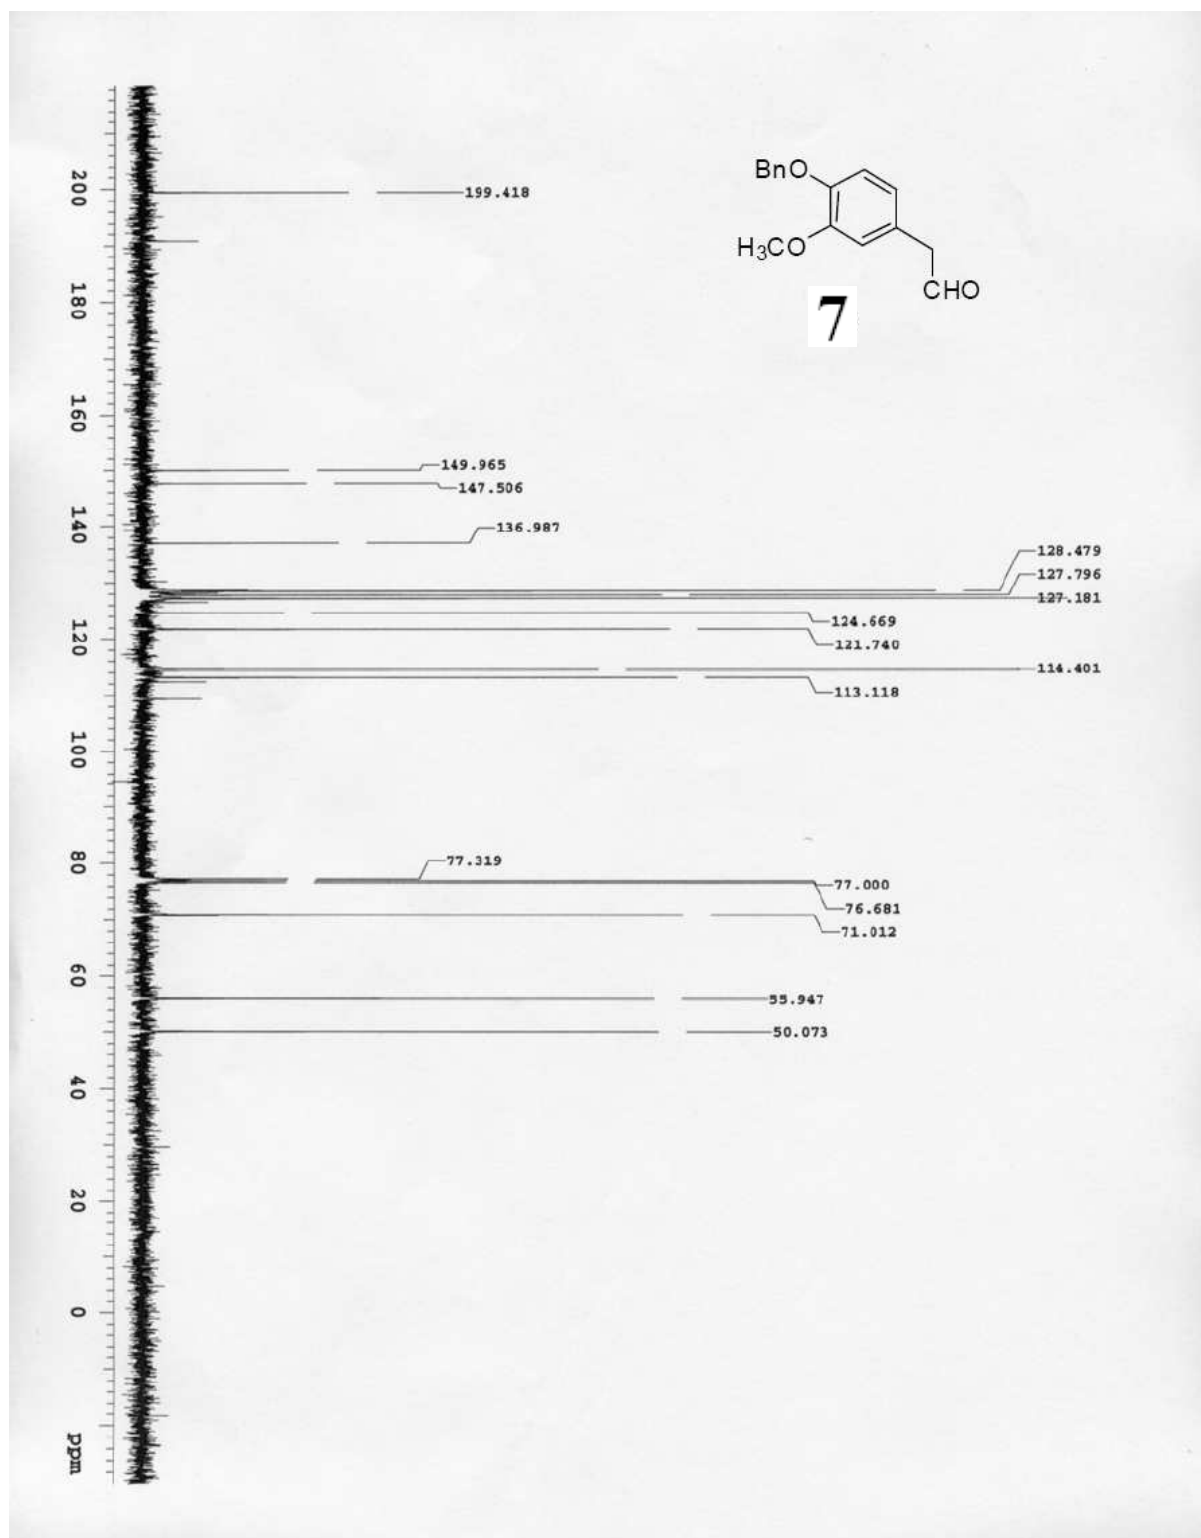

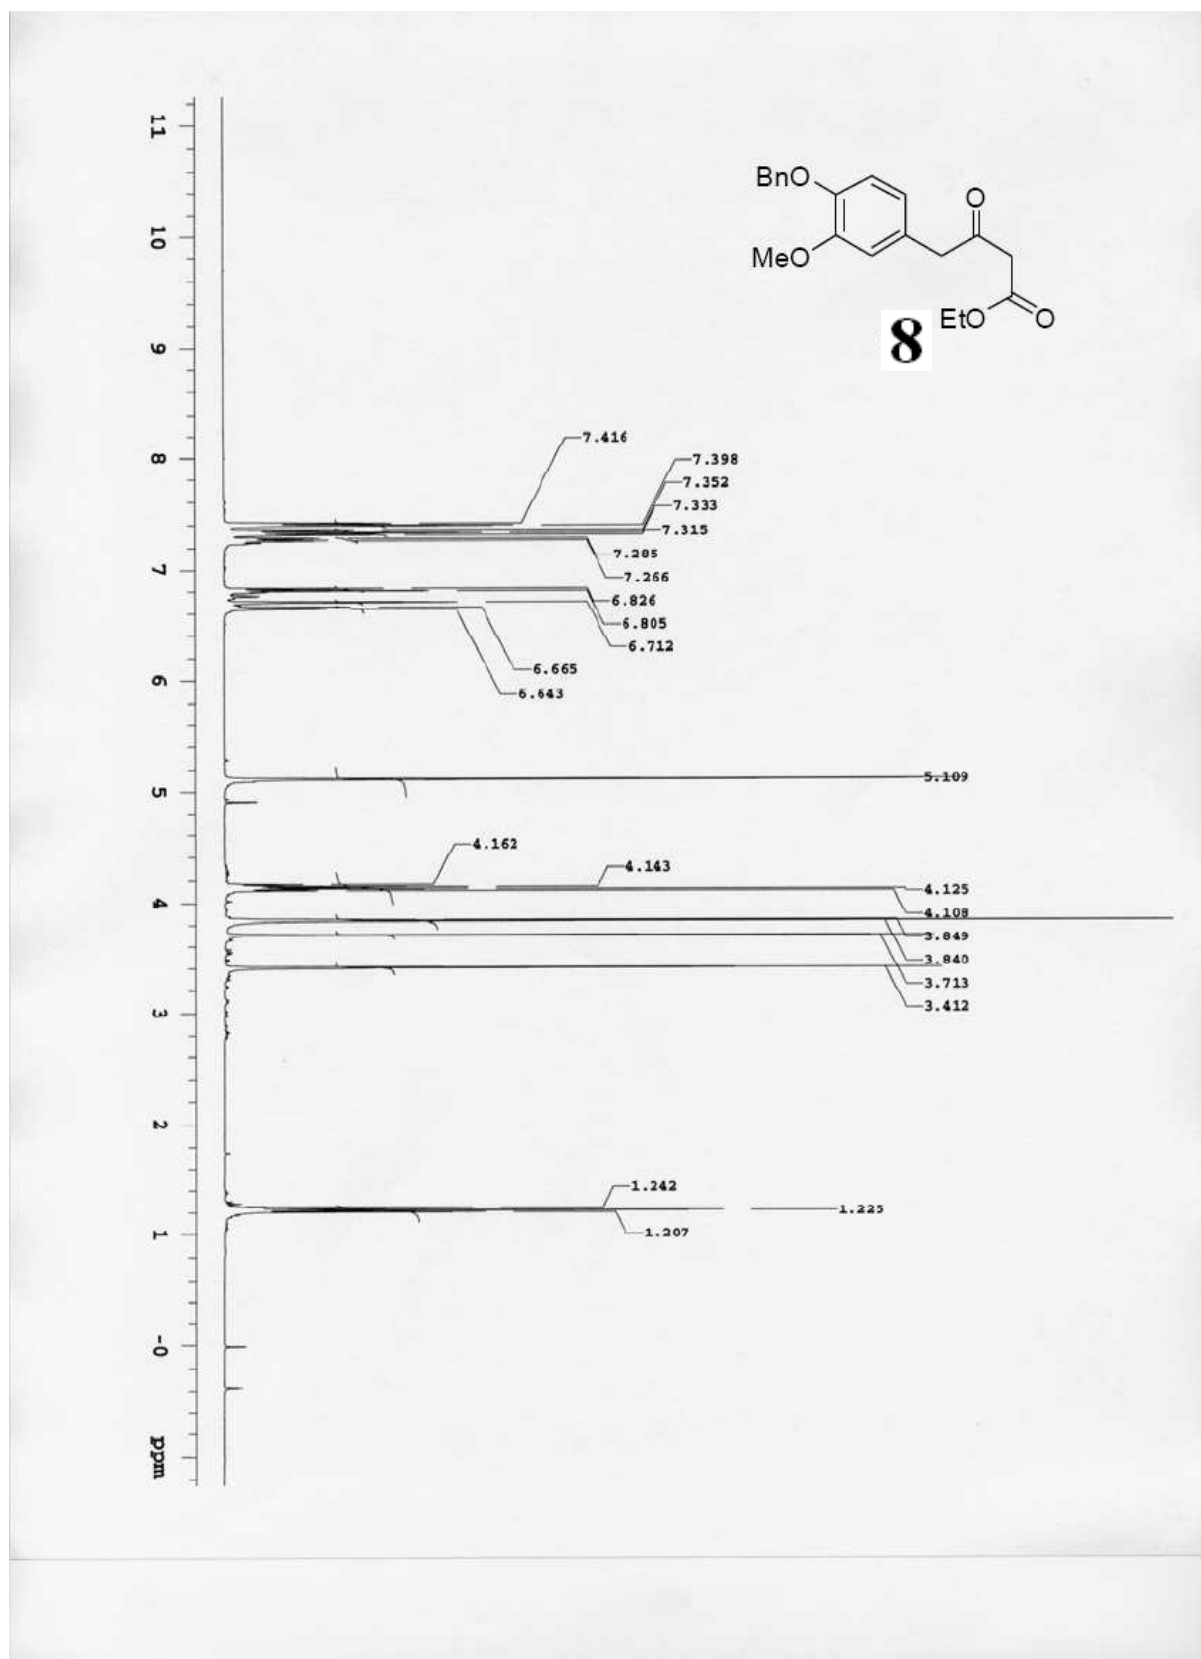



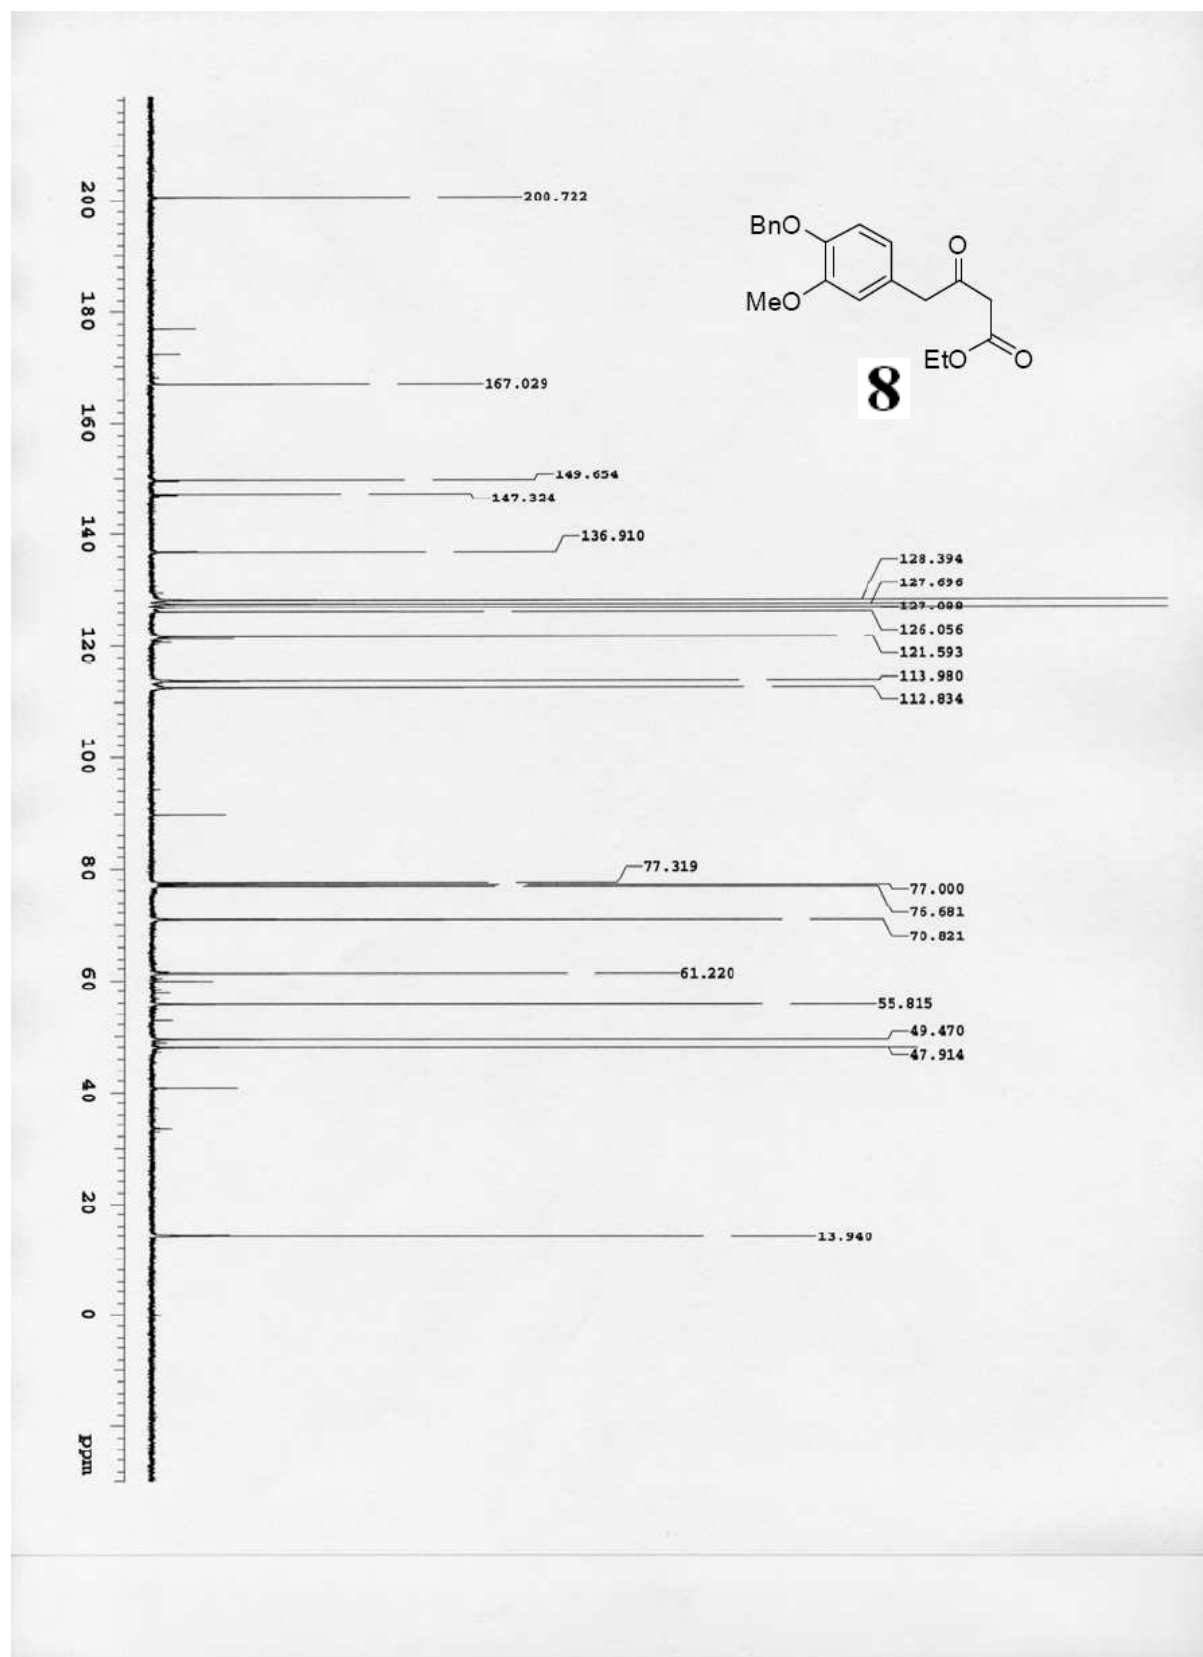

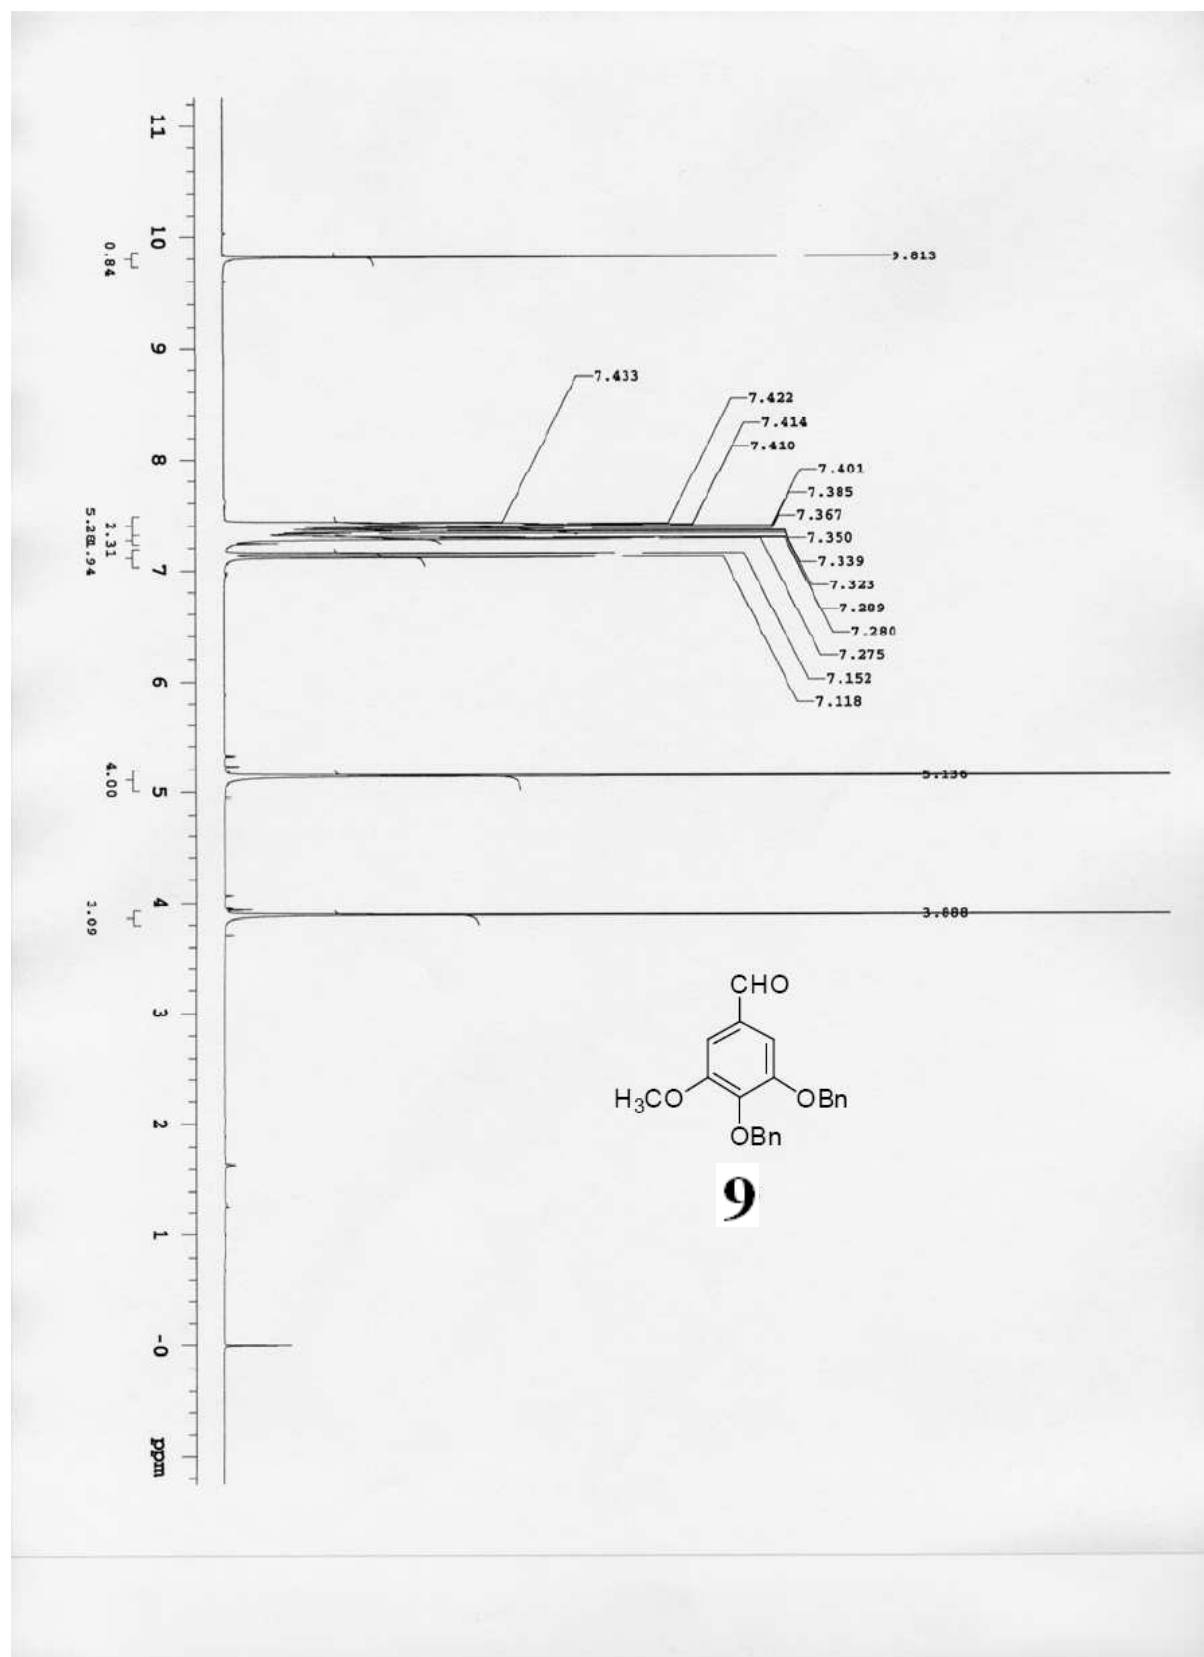

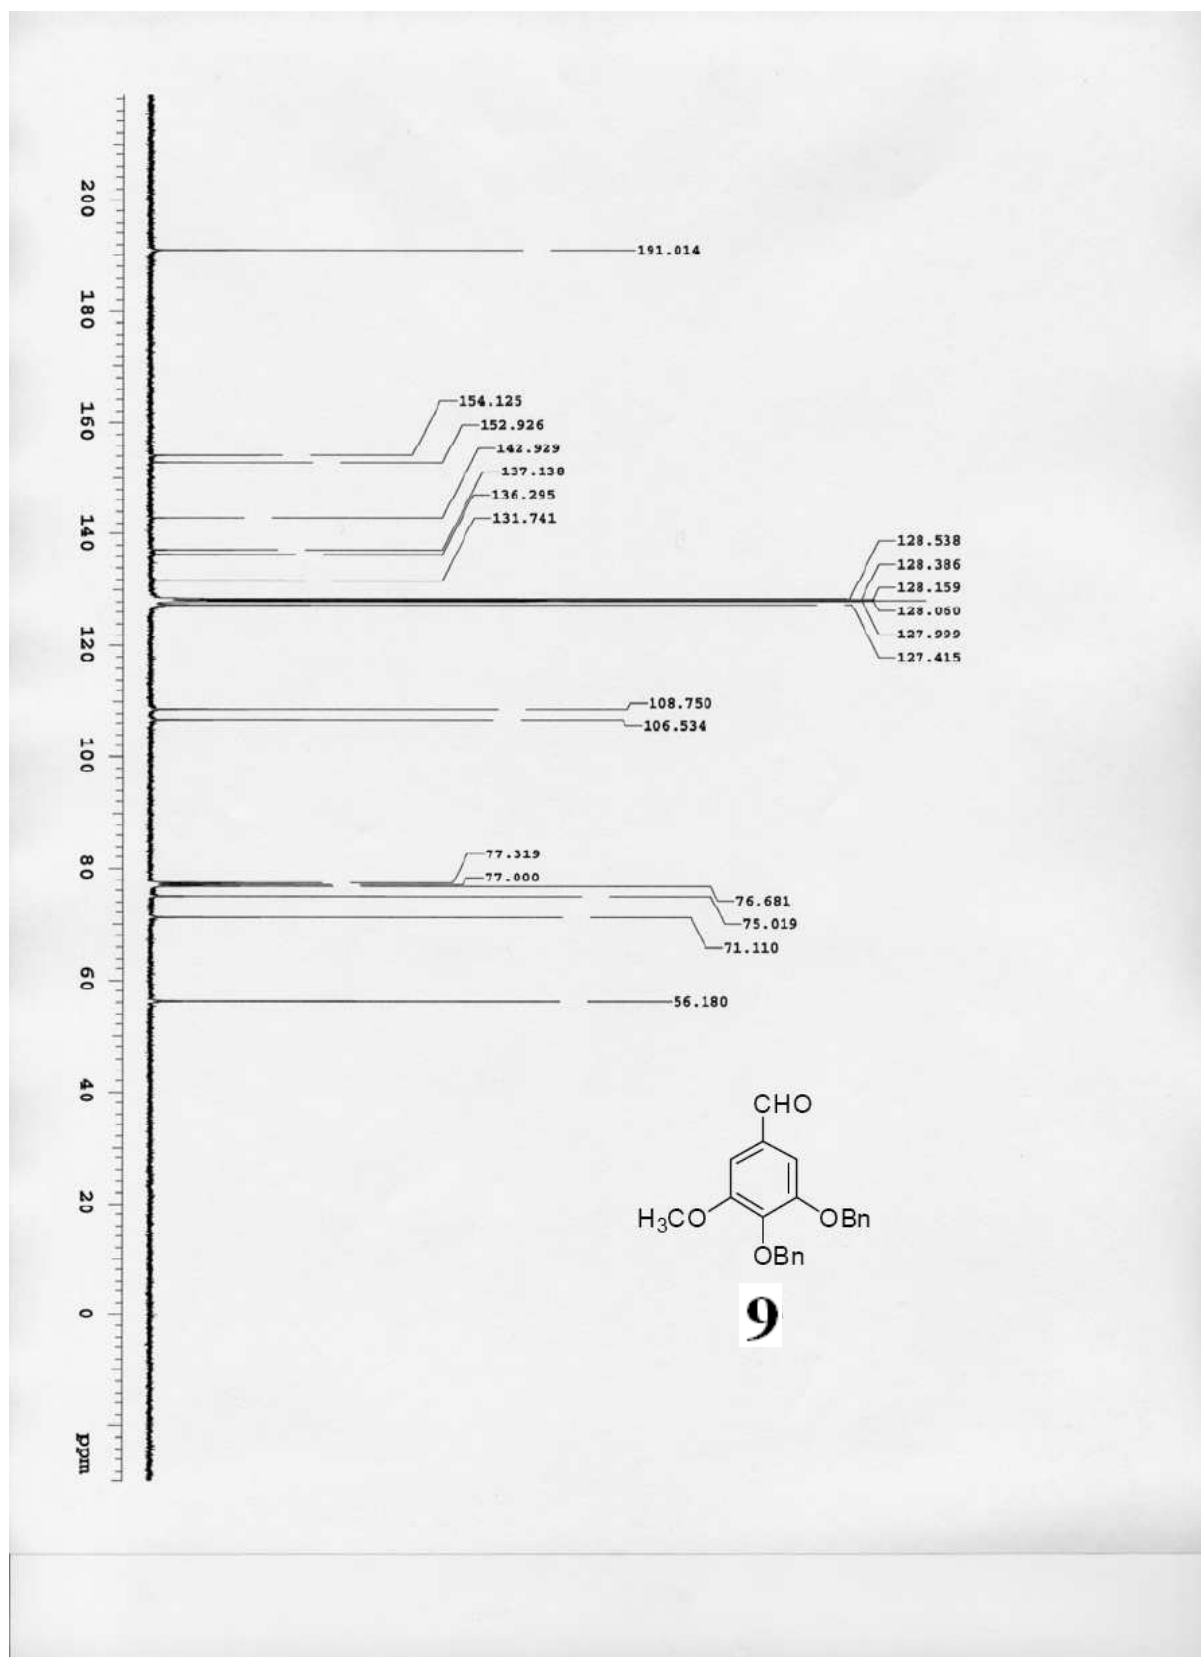

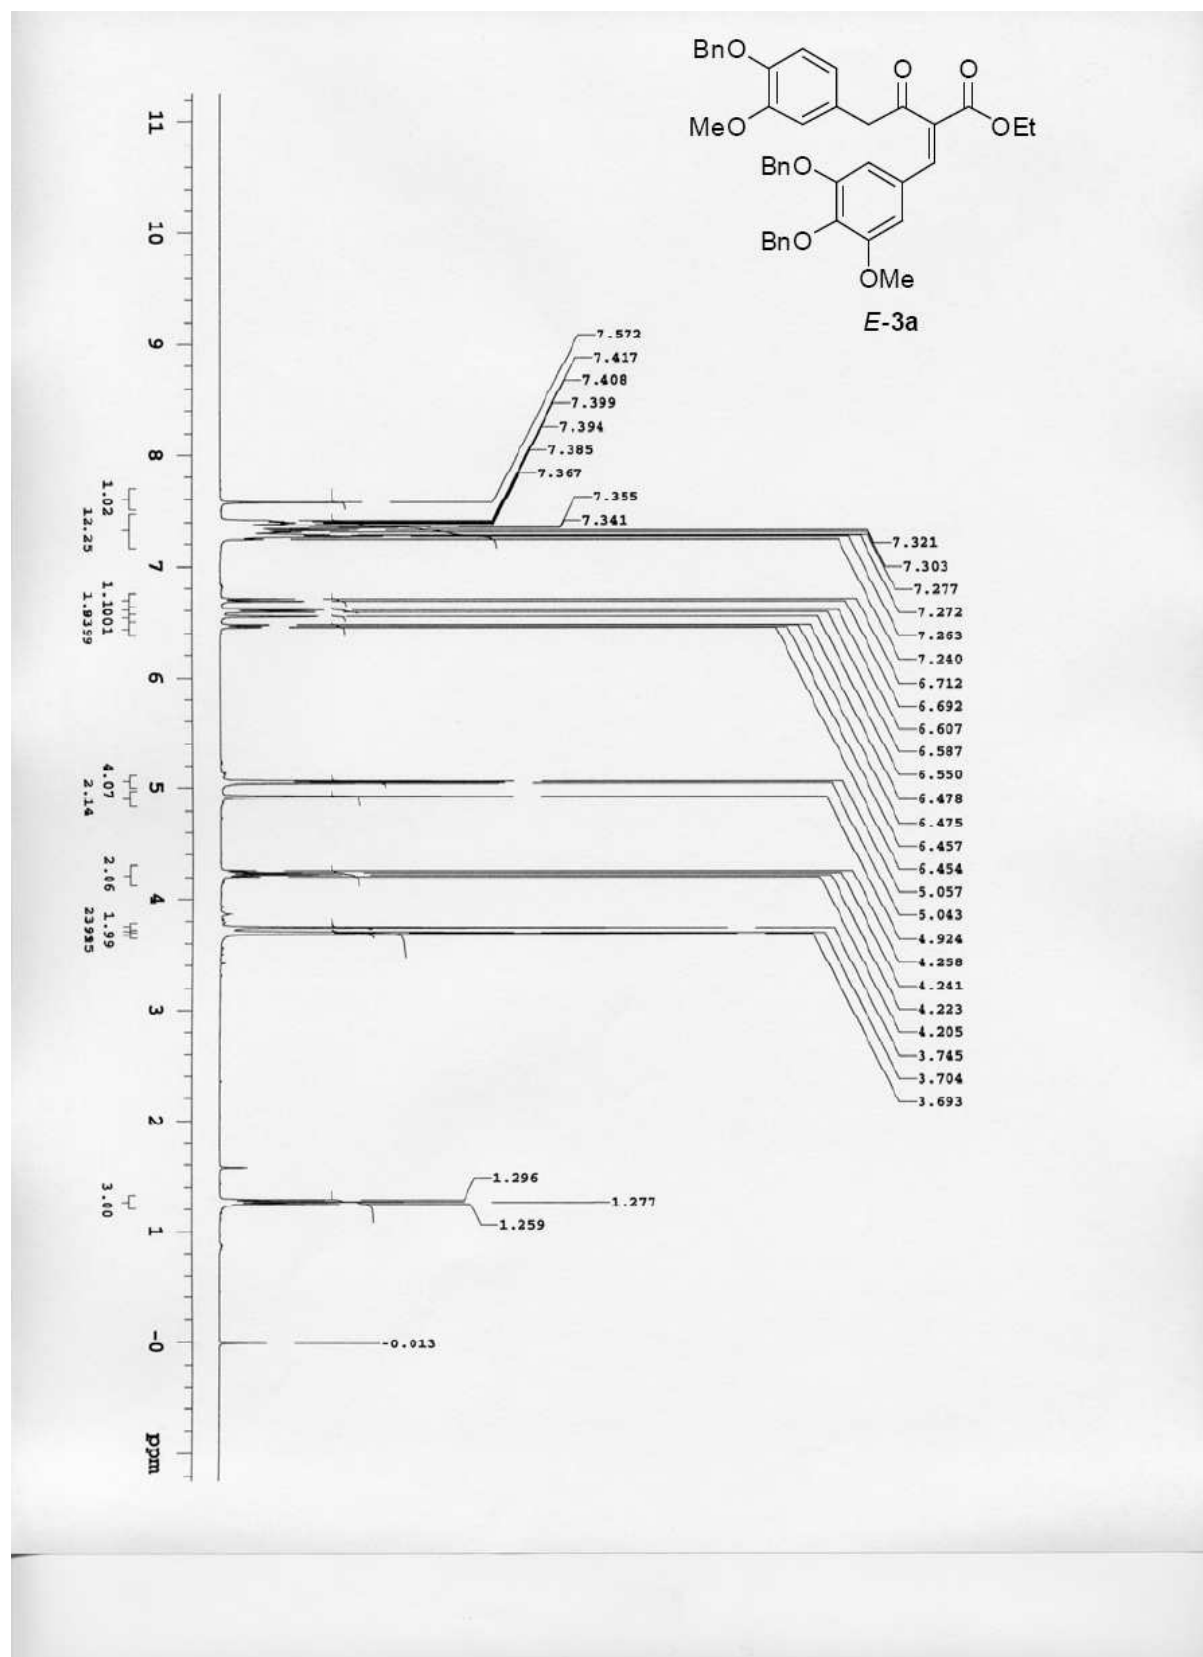

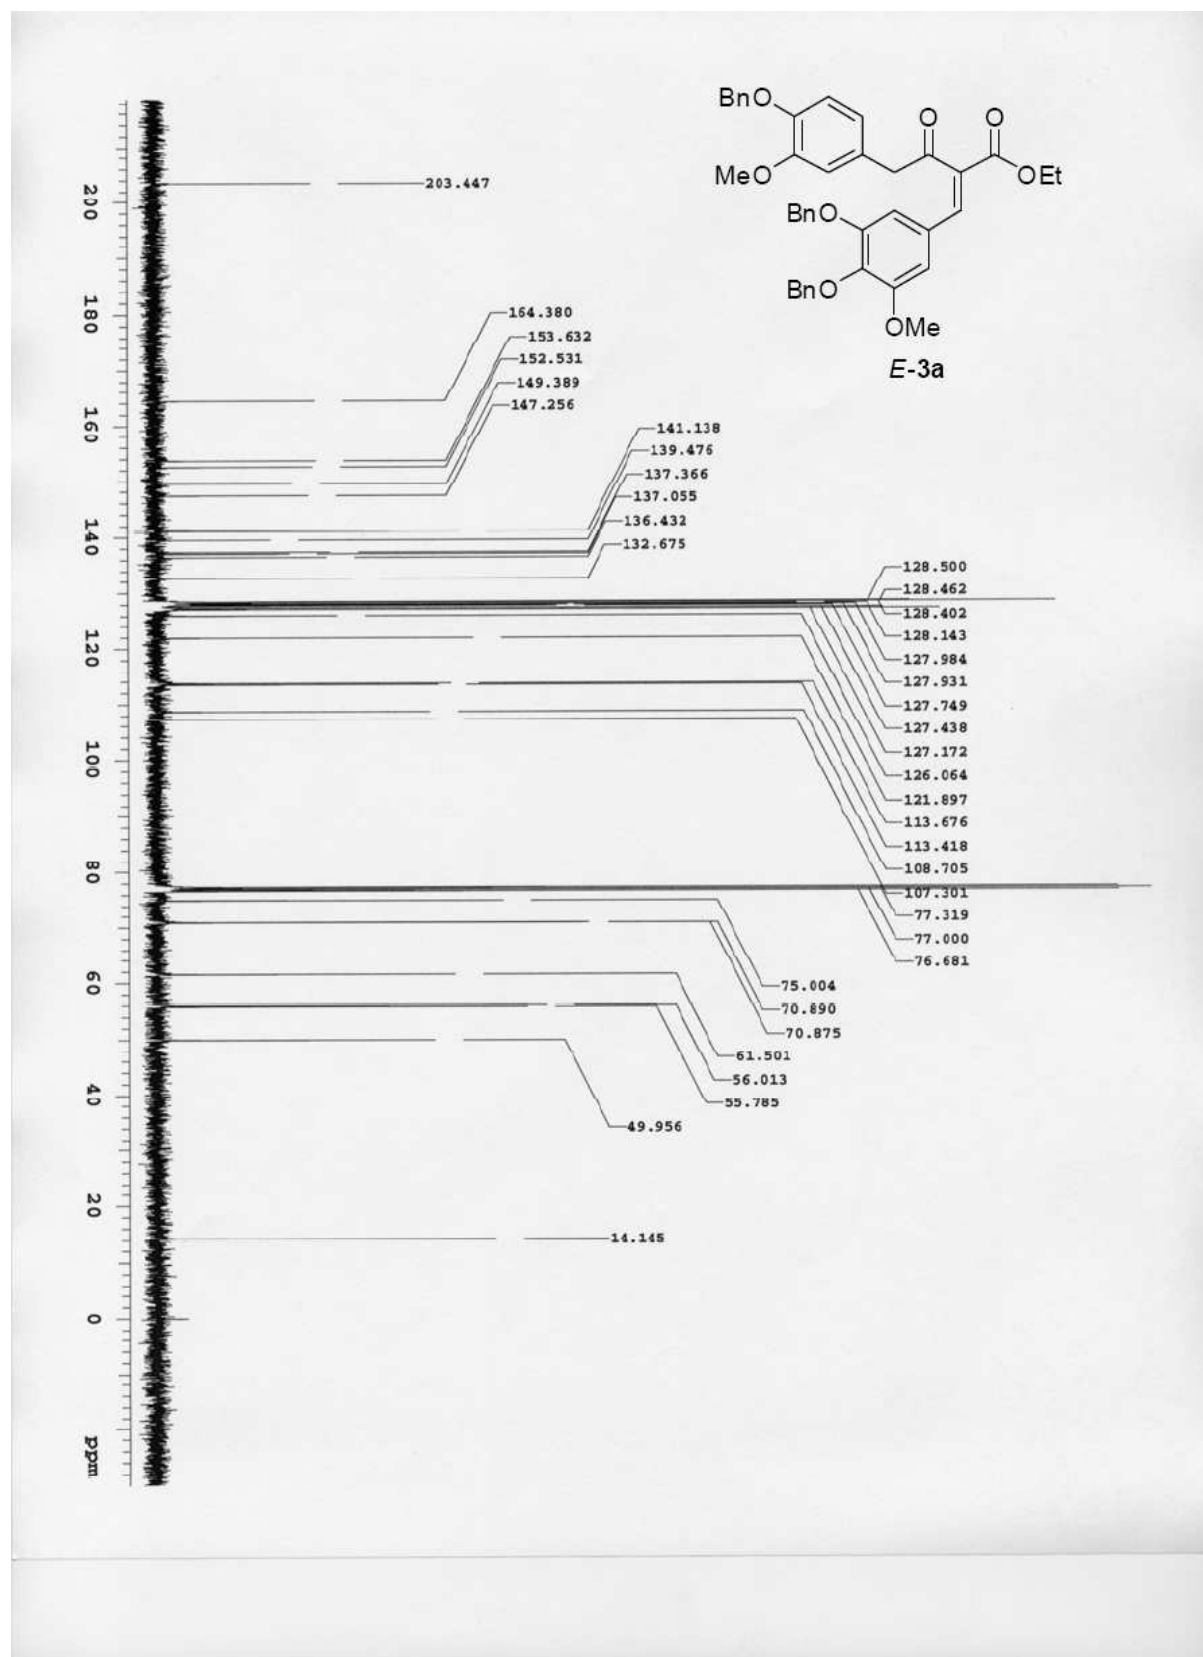

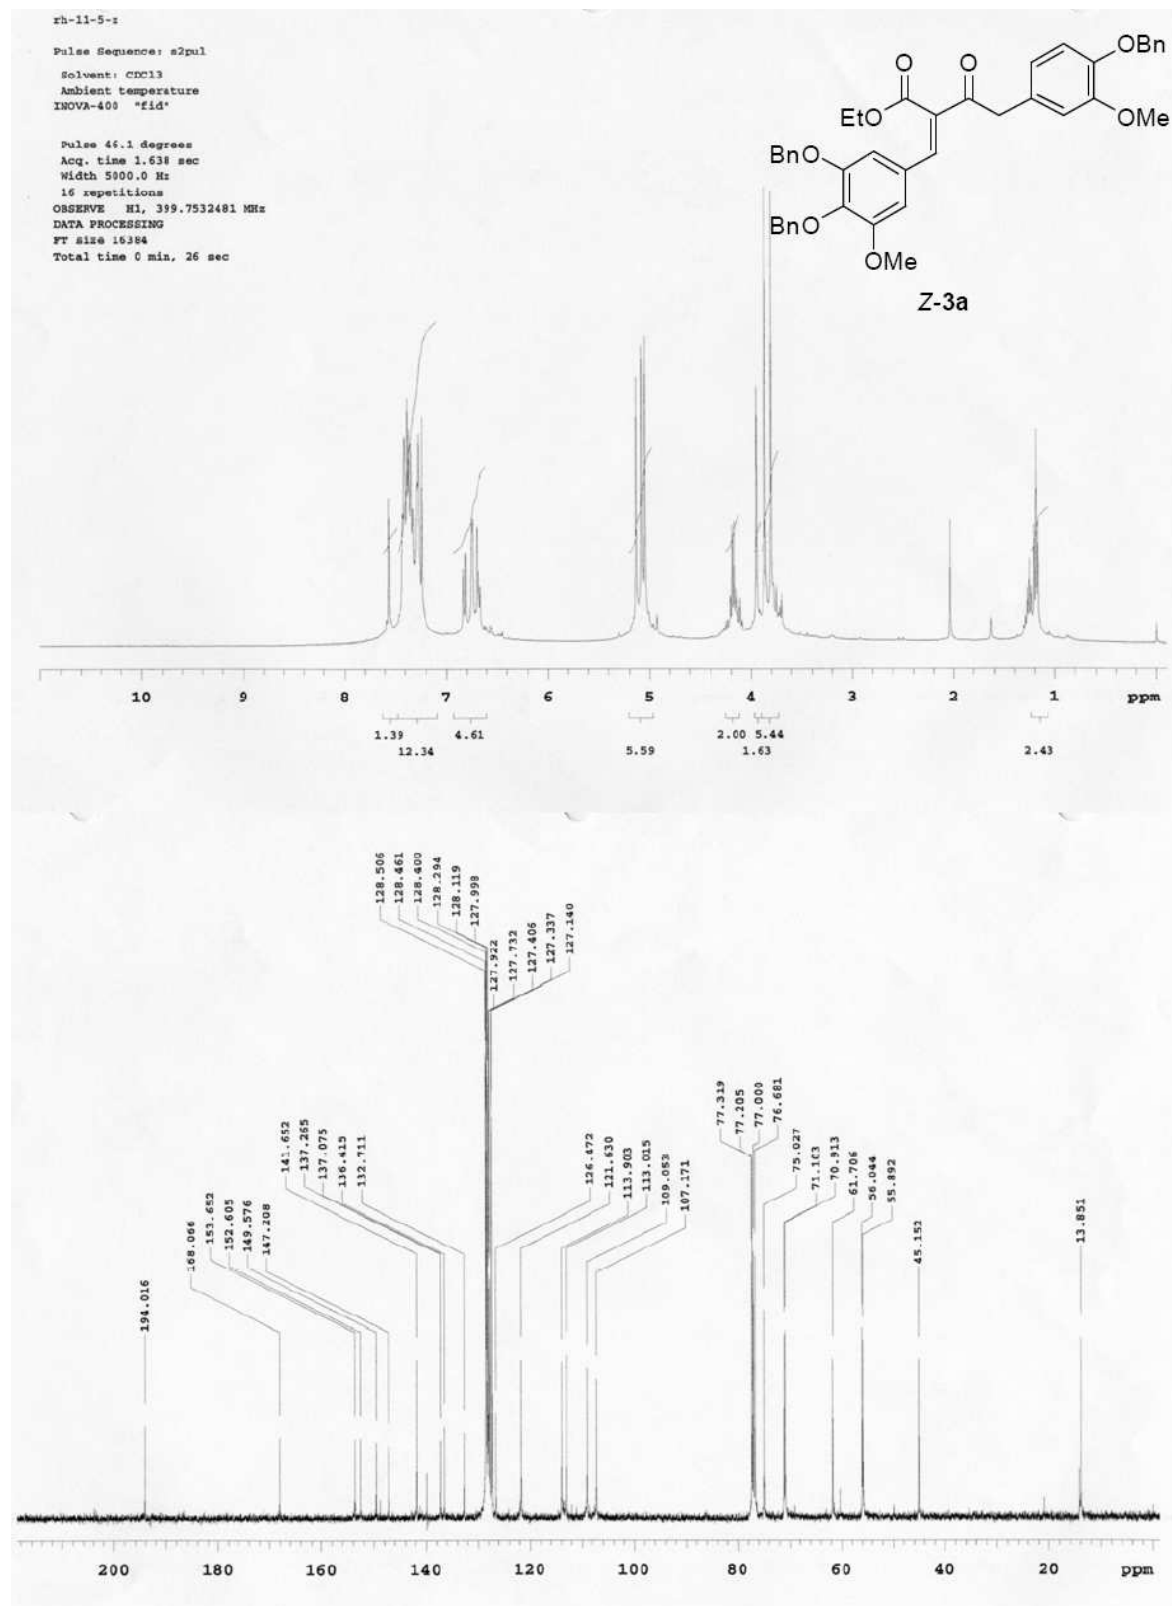

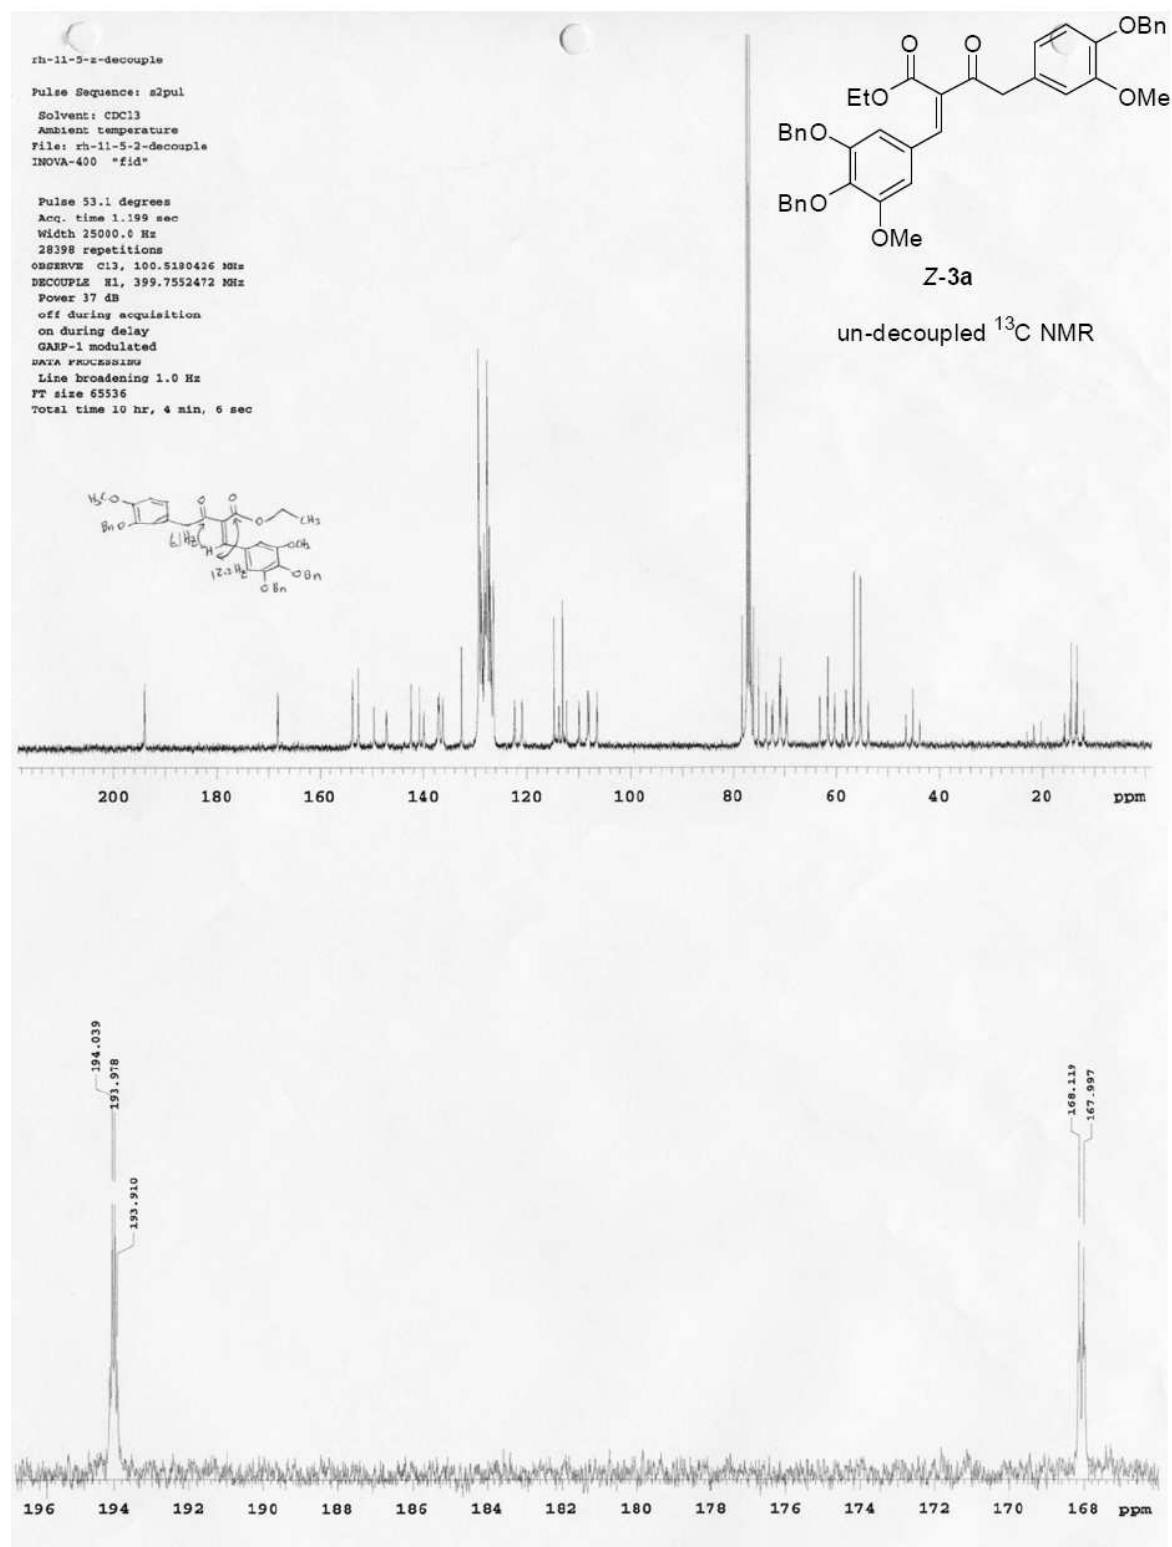

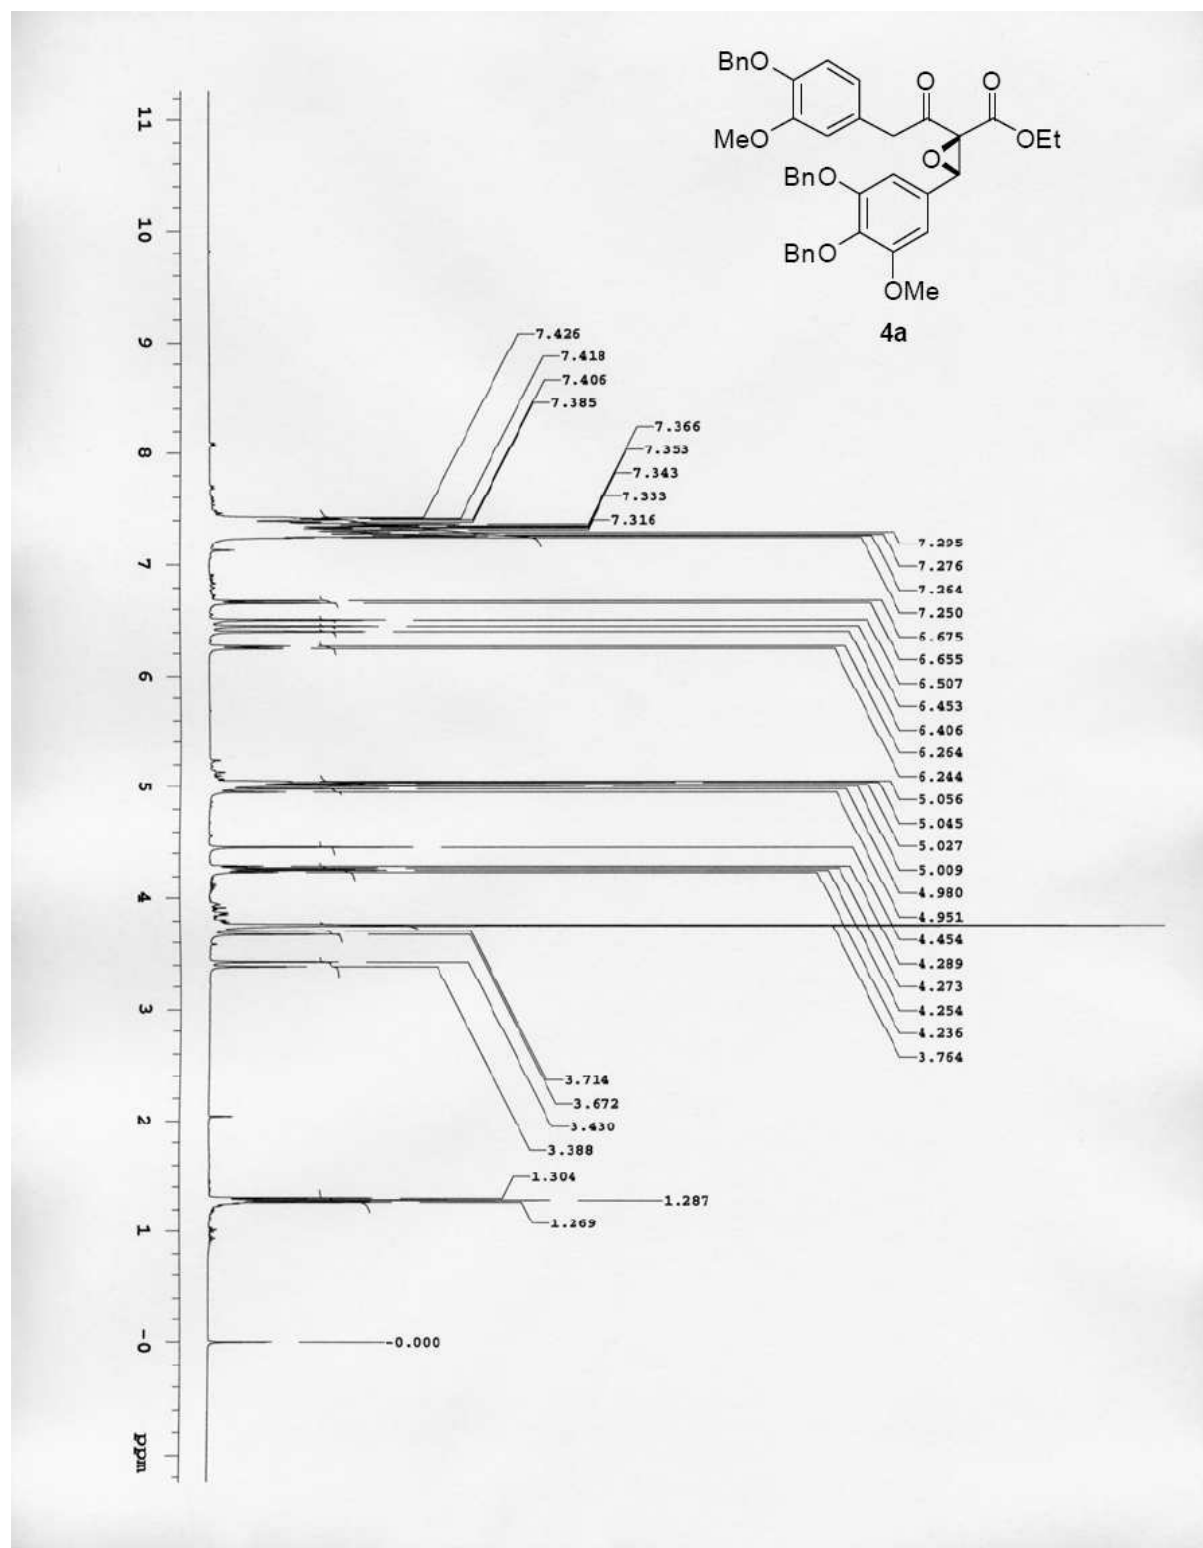



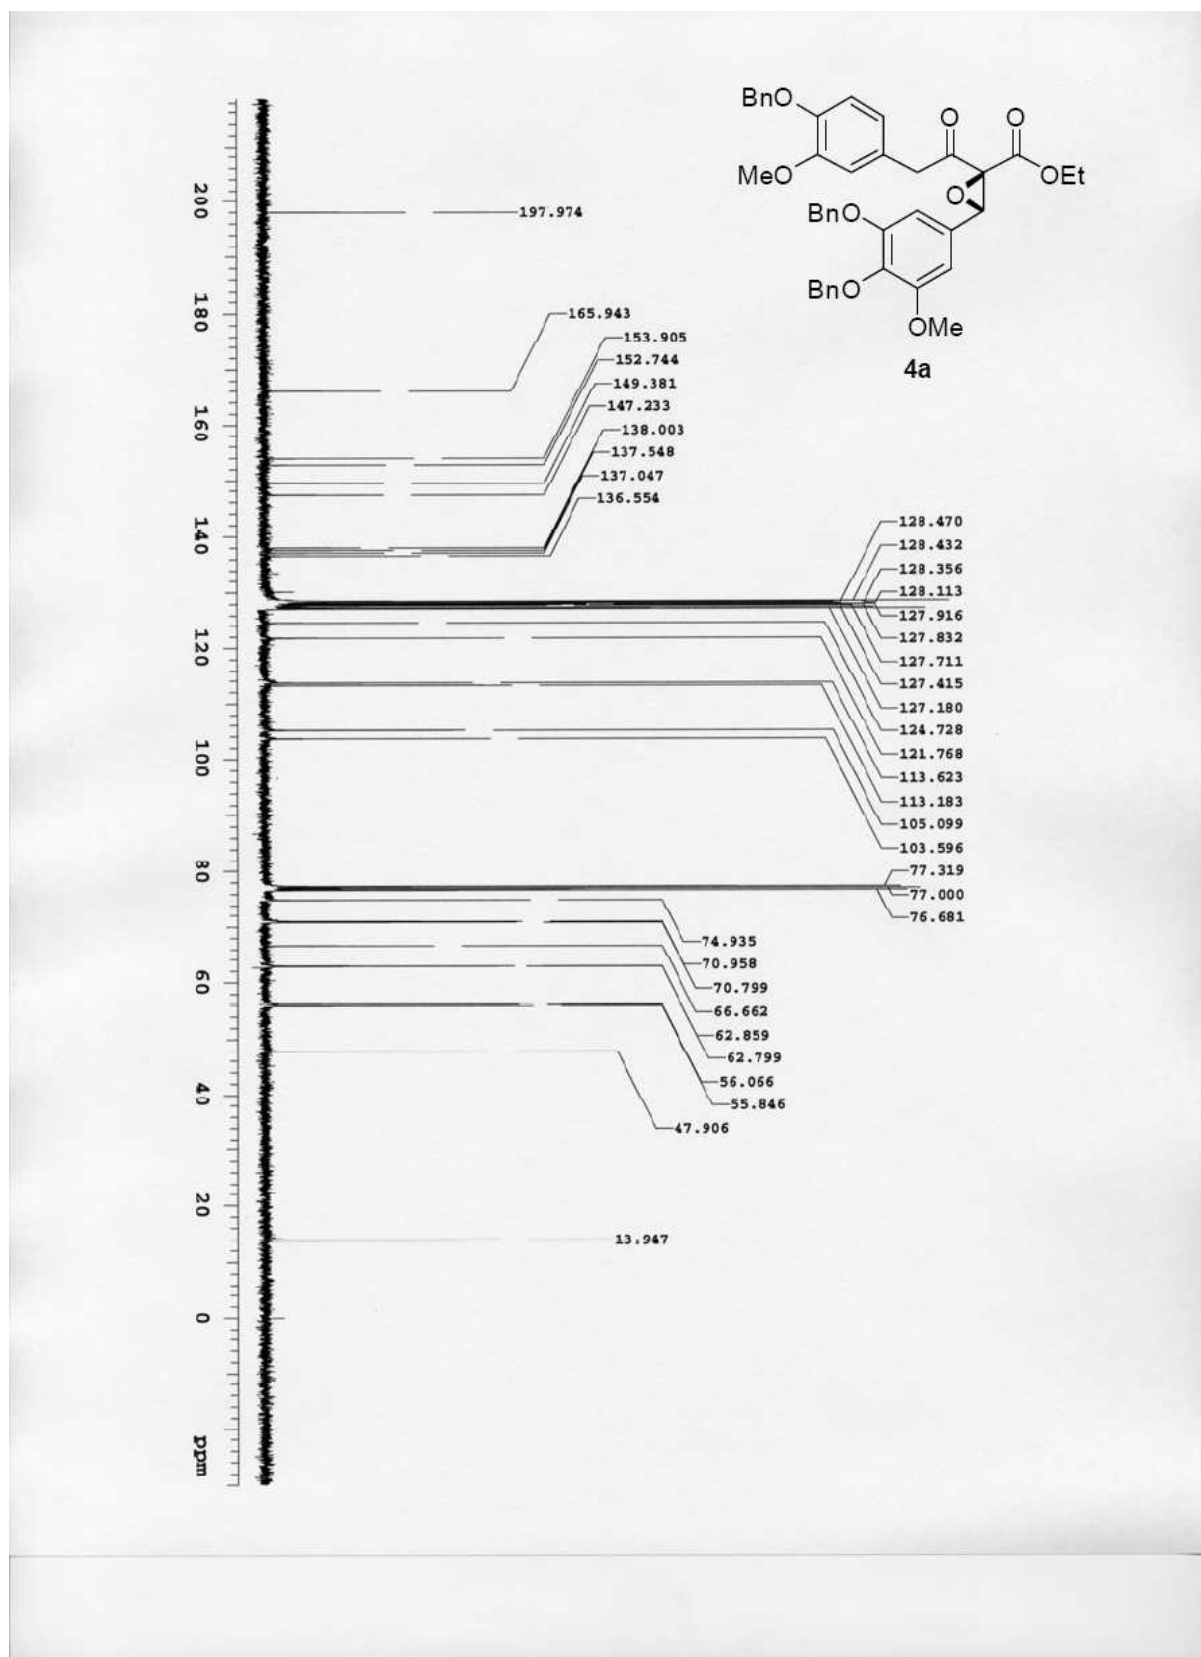

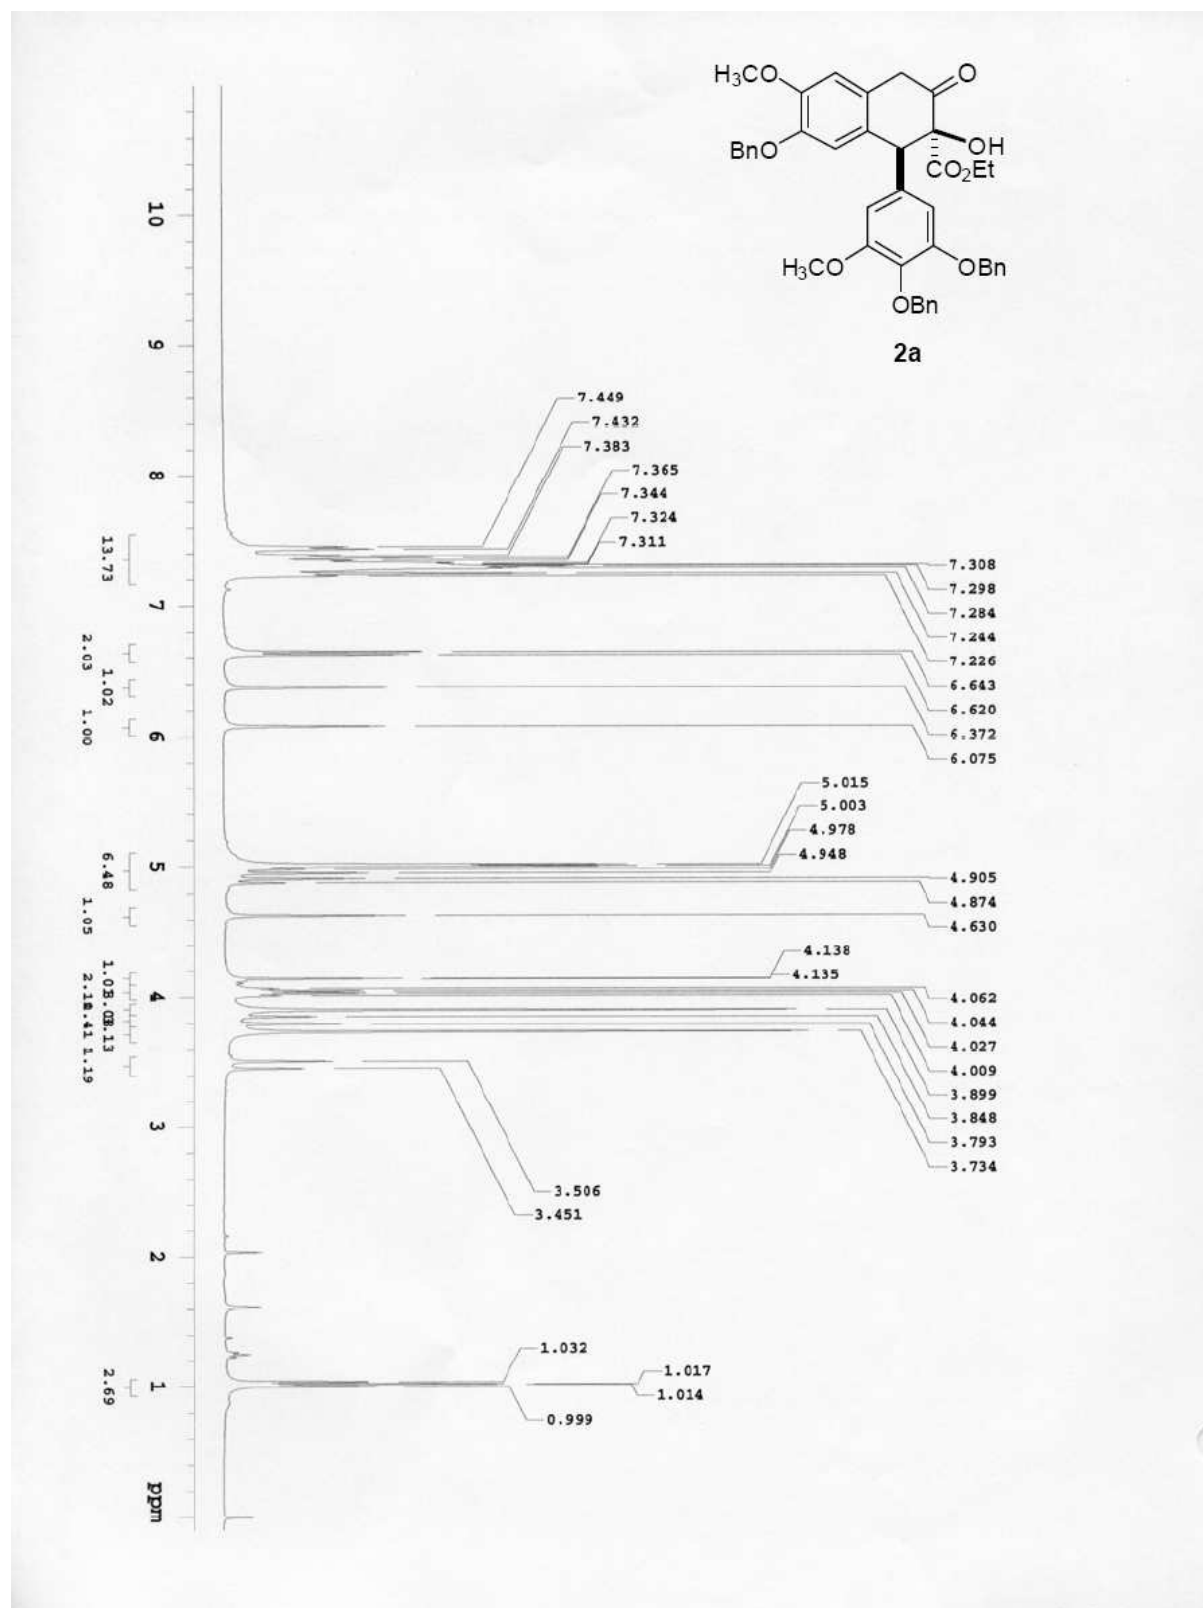

NOESY of **2a**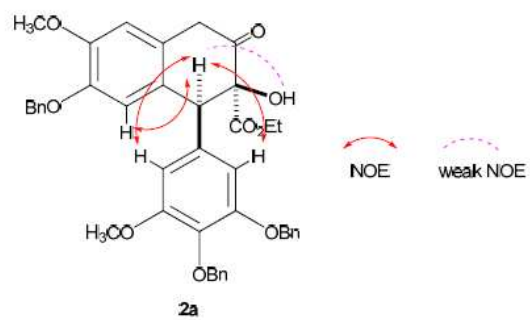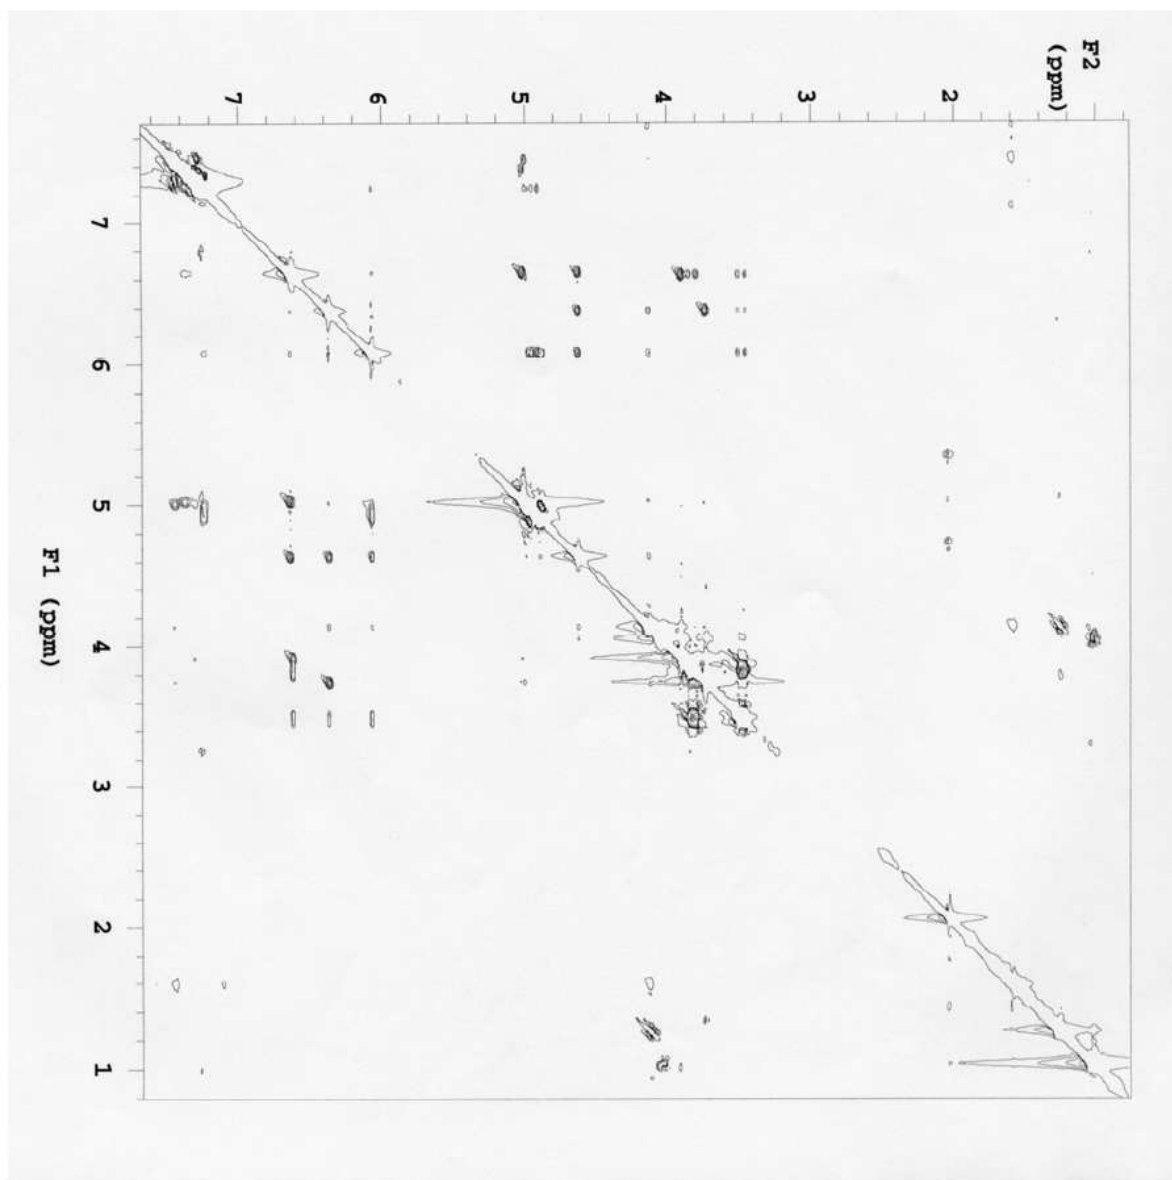

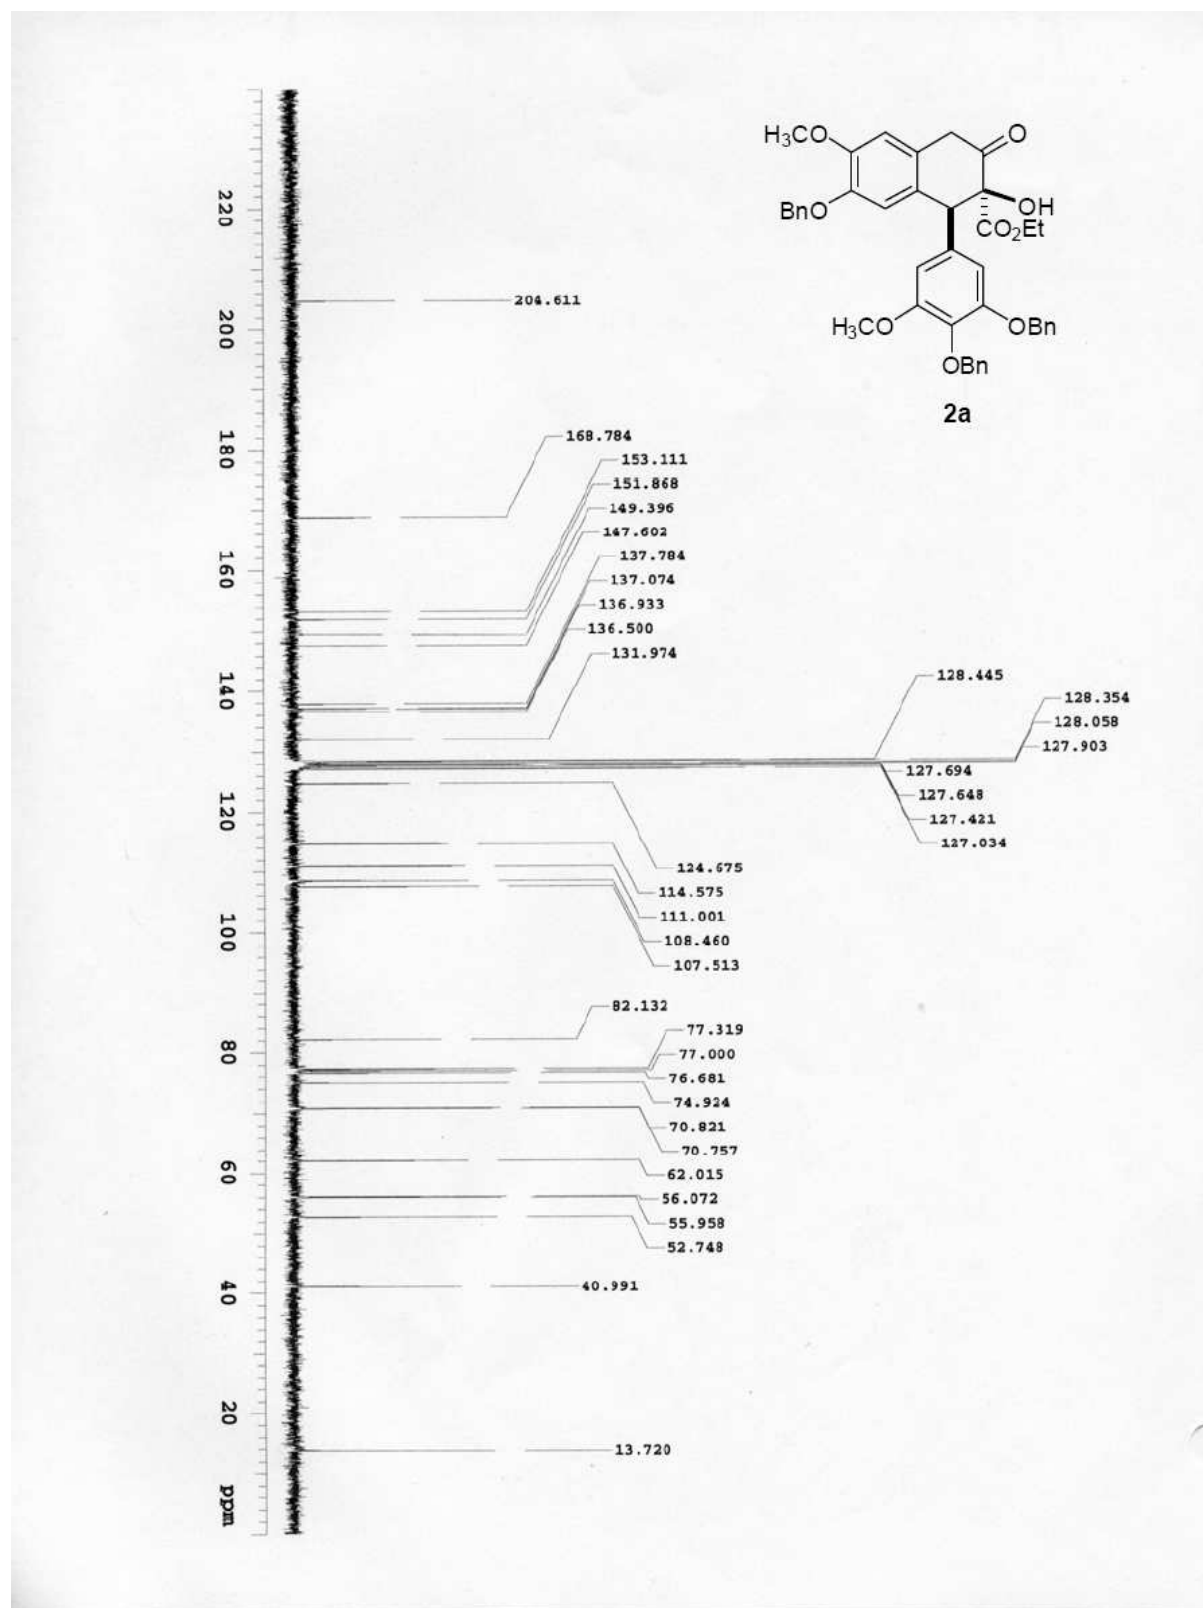

HPLC of **2a**: (The racemic sample was prepared by mixing both enantiomers.)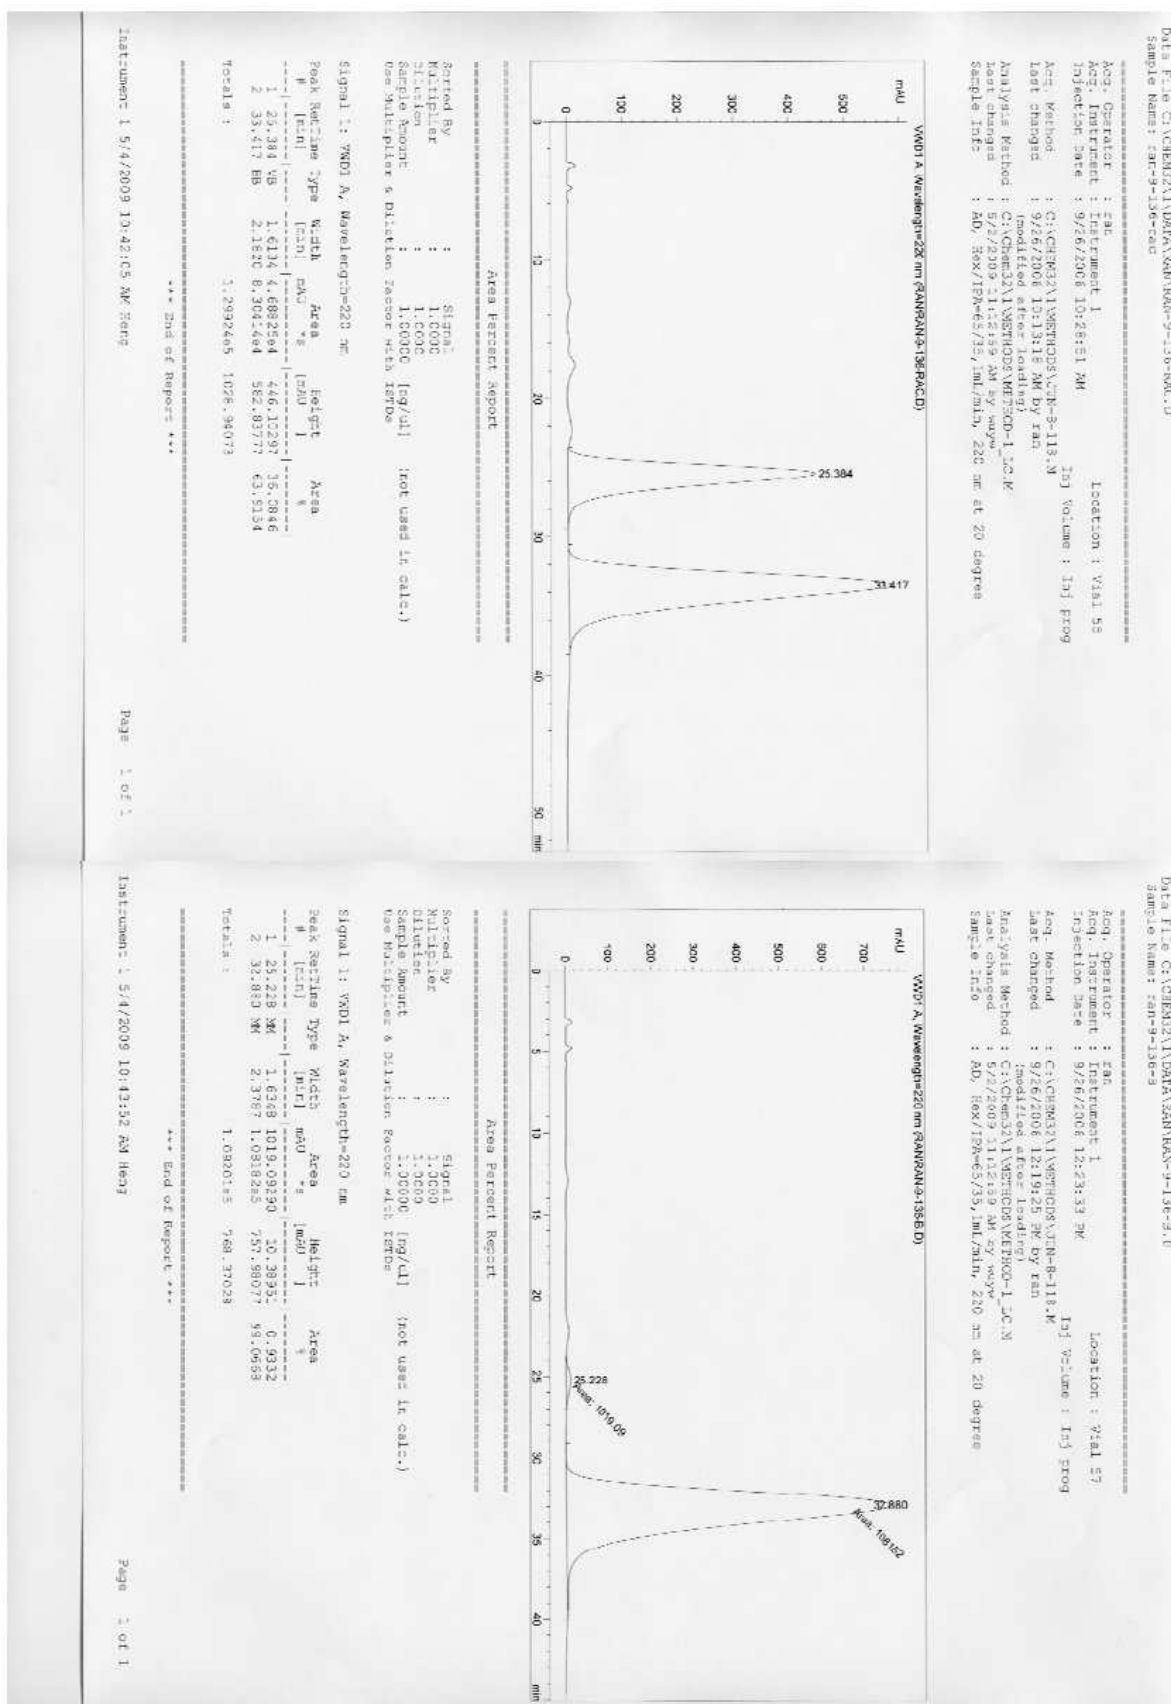

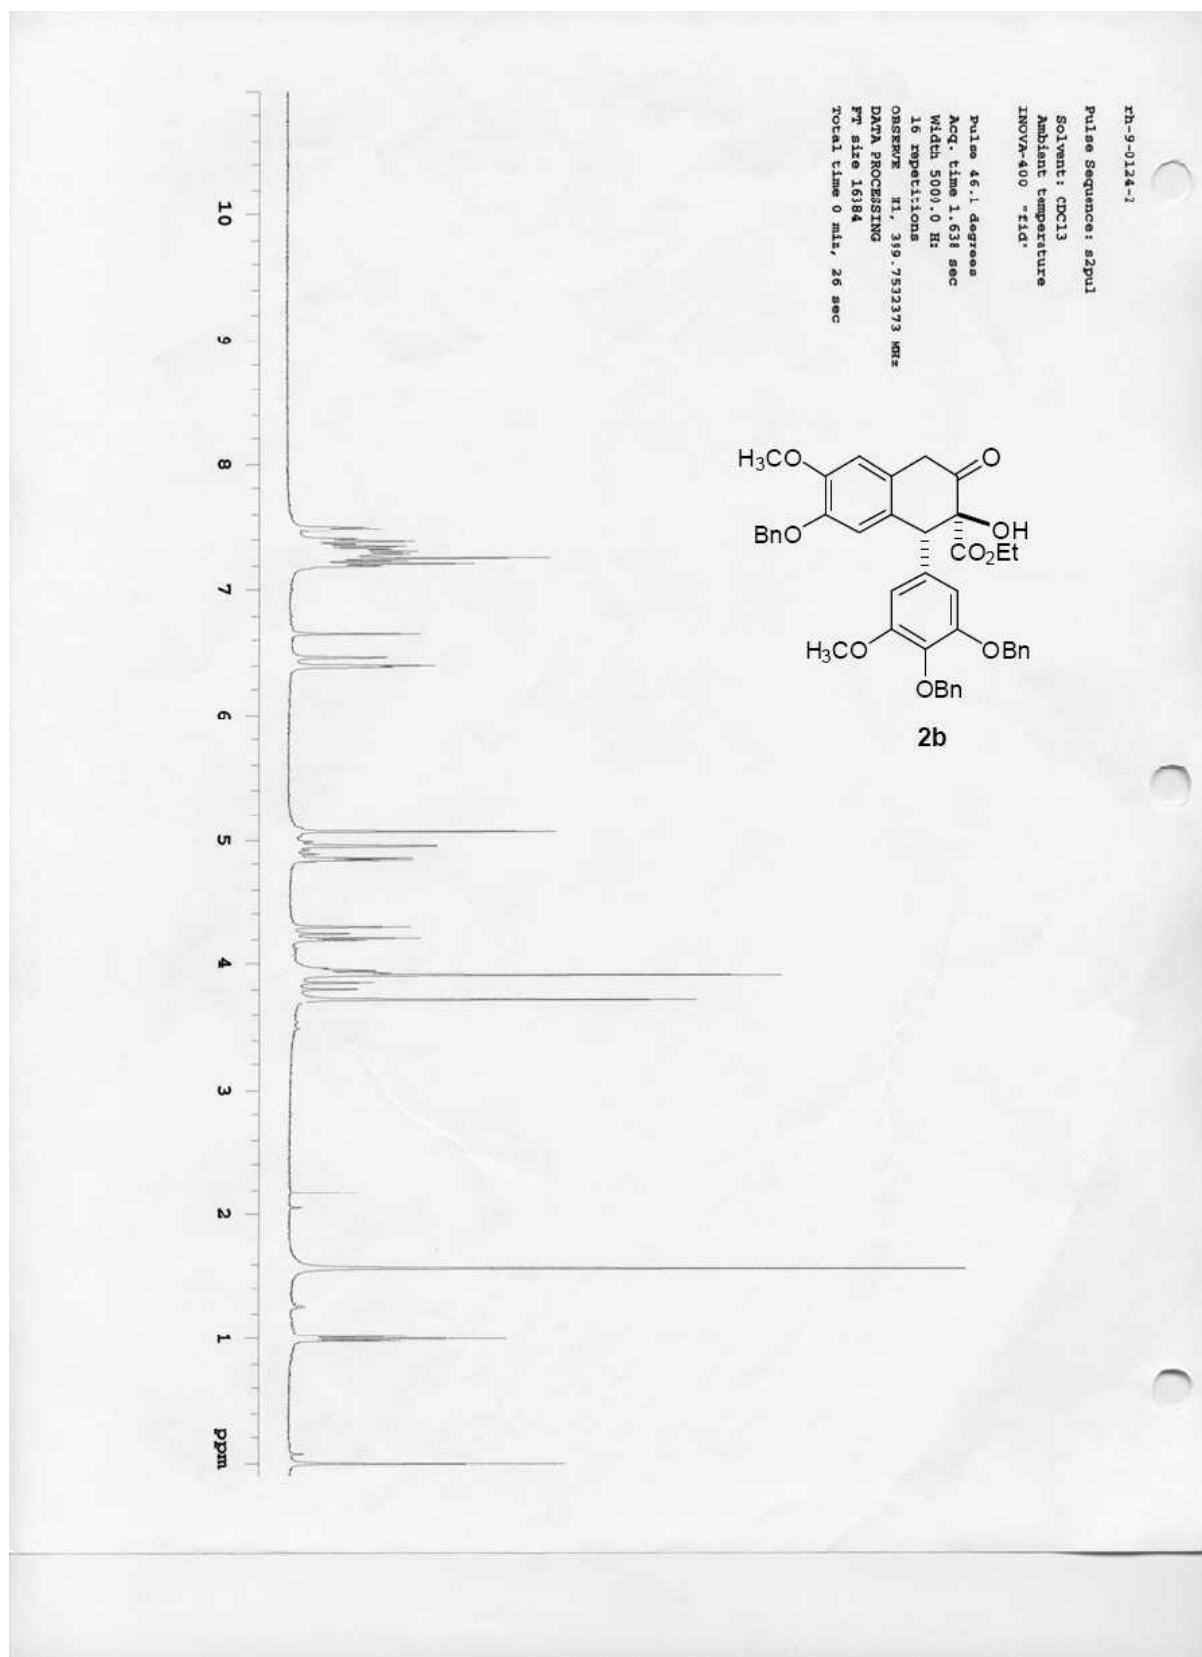

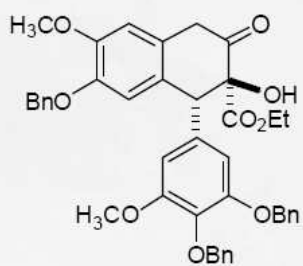

NOESY of 2b

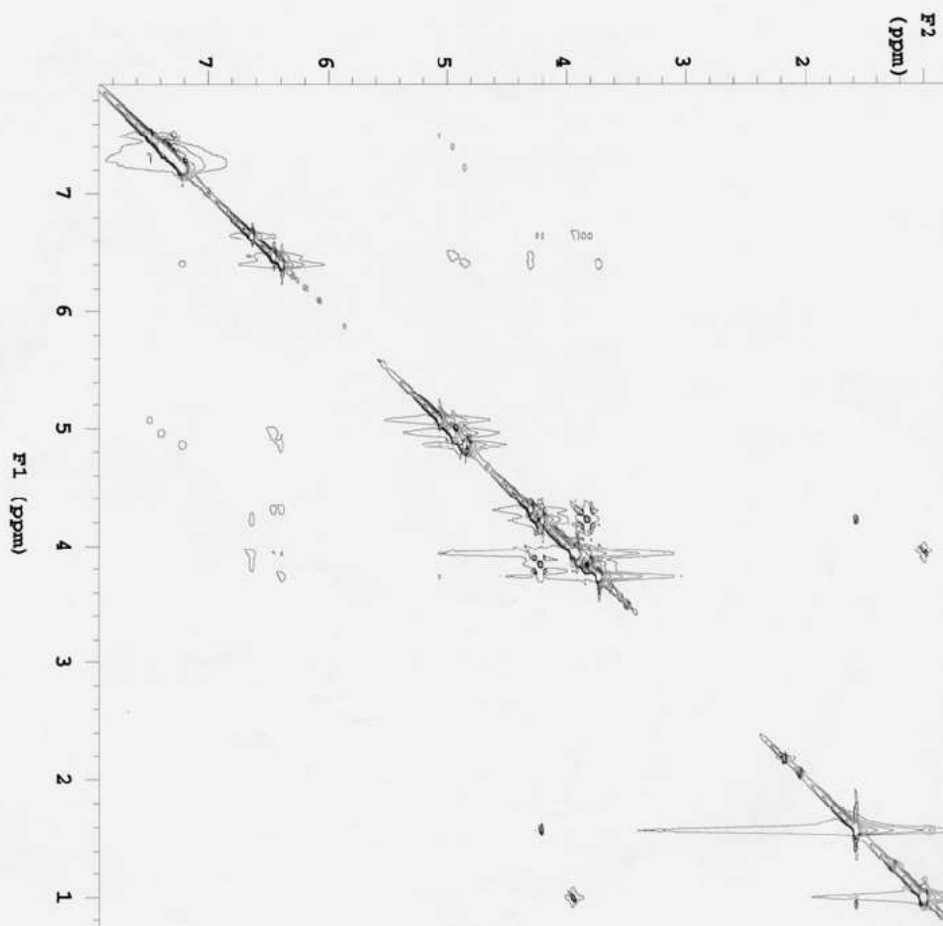

rh-9-114-2-noe  
 Pulse Sequence: NOESY  
 Solvent: CDCl3  
 Ambient Temperature  
 INOVA-400 "F1d"  
 Relax. delay 1.010 sec  
 Mixing 0.400 sec  
 Acq. time 0.205 sec  
 Width 5000.0 Hz  
 2D Width 5000.0 Hz  
 48 repetitions  
 2 x 200 increments  
 OBSERVE H1, 399.7532373 MHz  
 DATA PROCESSING  
 Gauss apodization 0.095 sec  
 F1 DATA PROCESSING  
 Gauss apodization 0.037 sec  
 FT size 2048 x 2048  
 Total time 8 hr, 43 min, 47 sec

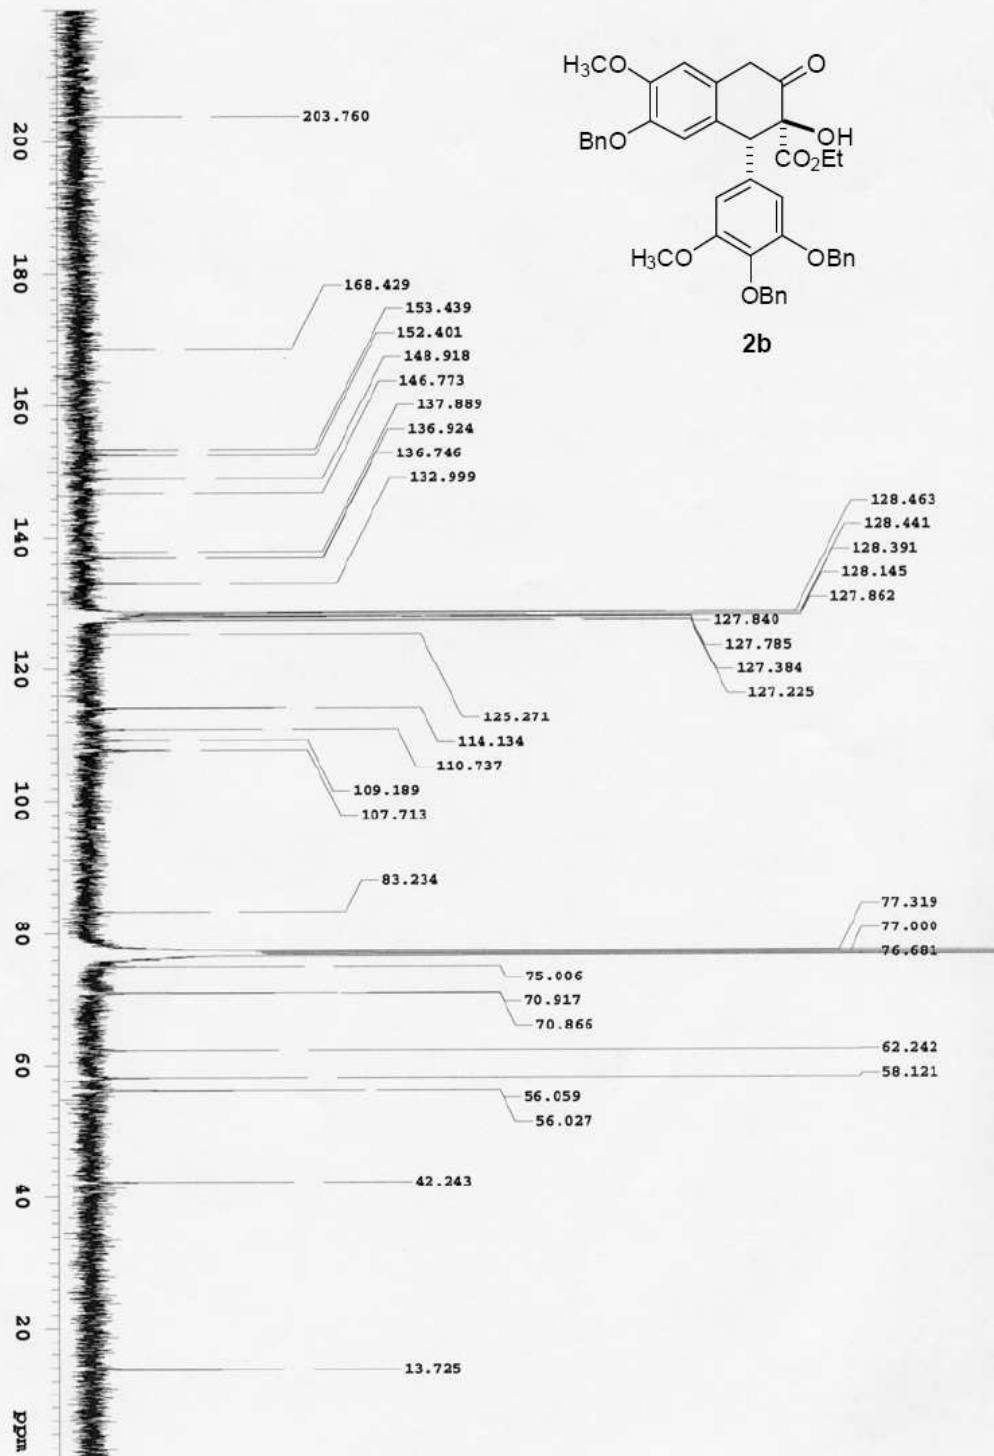





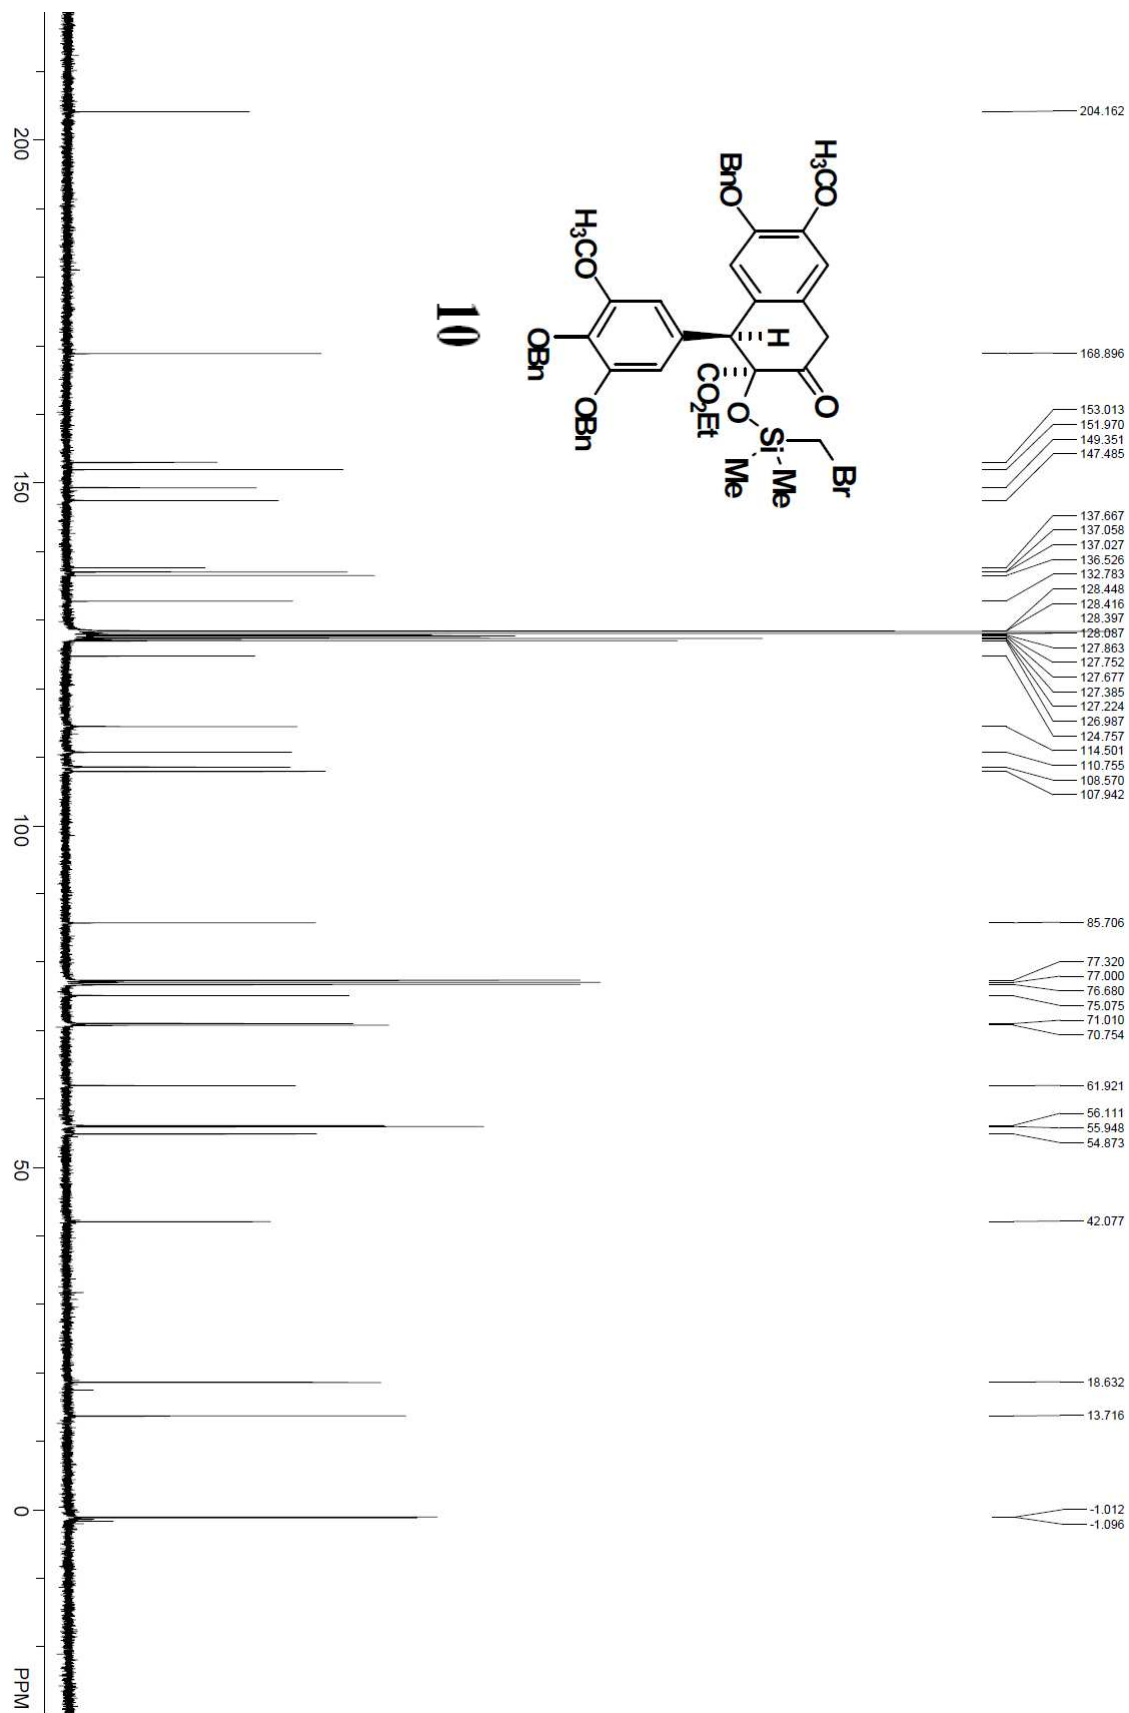





NOESY of **11**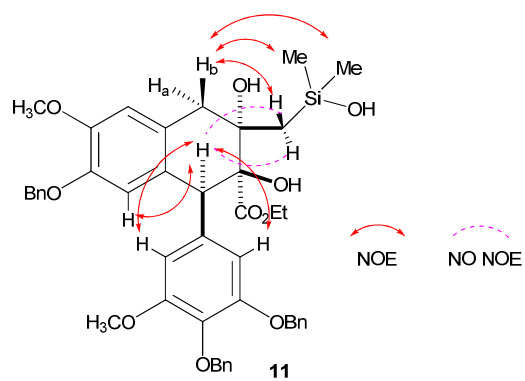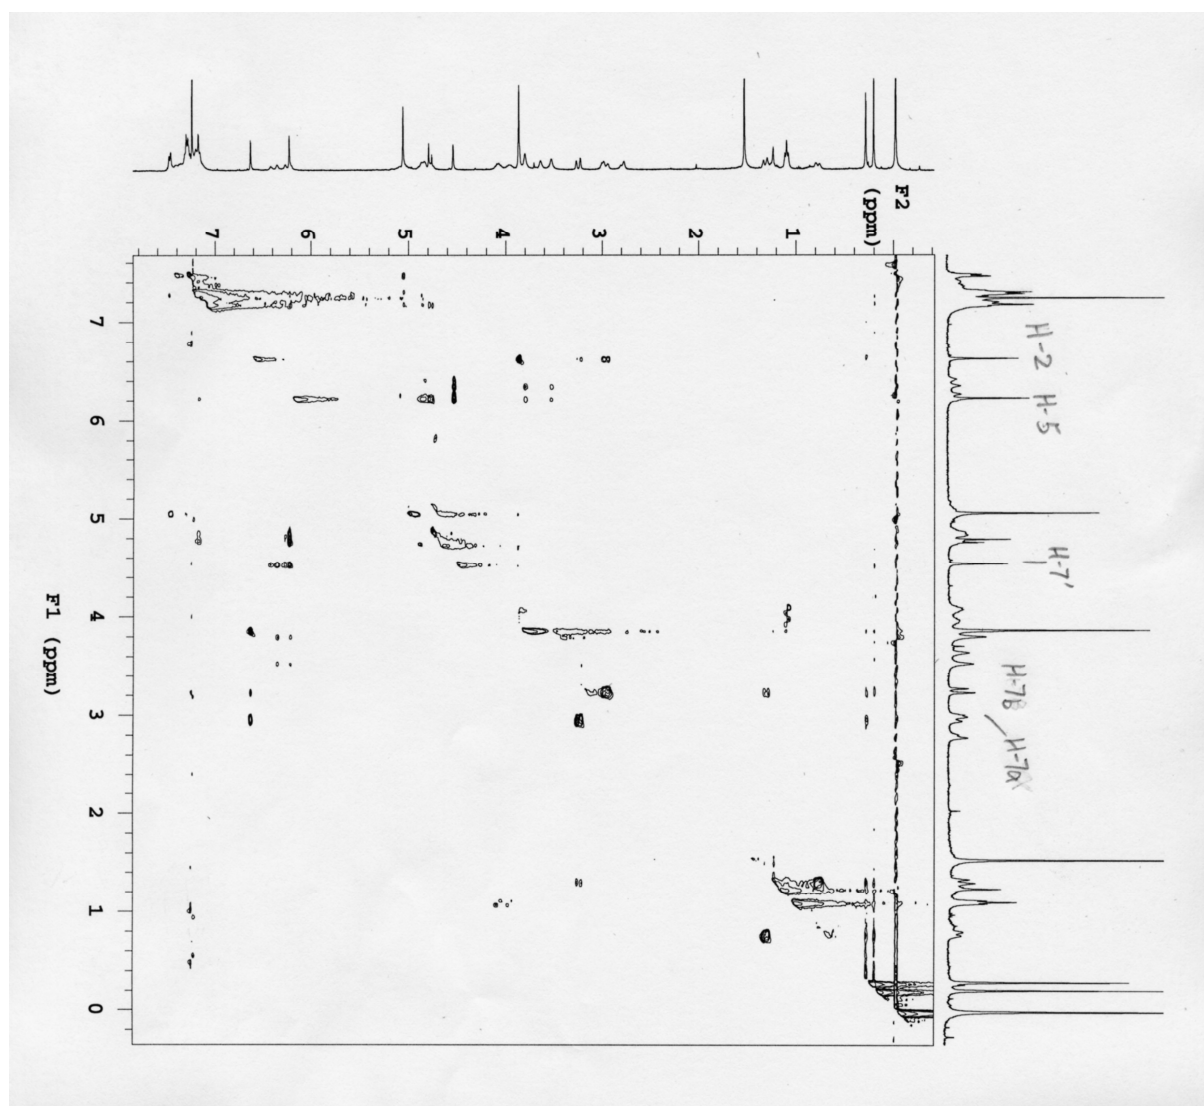

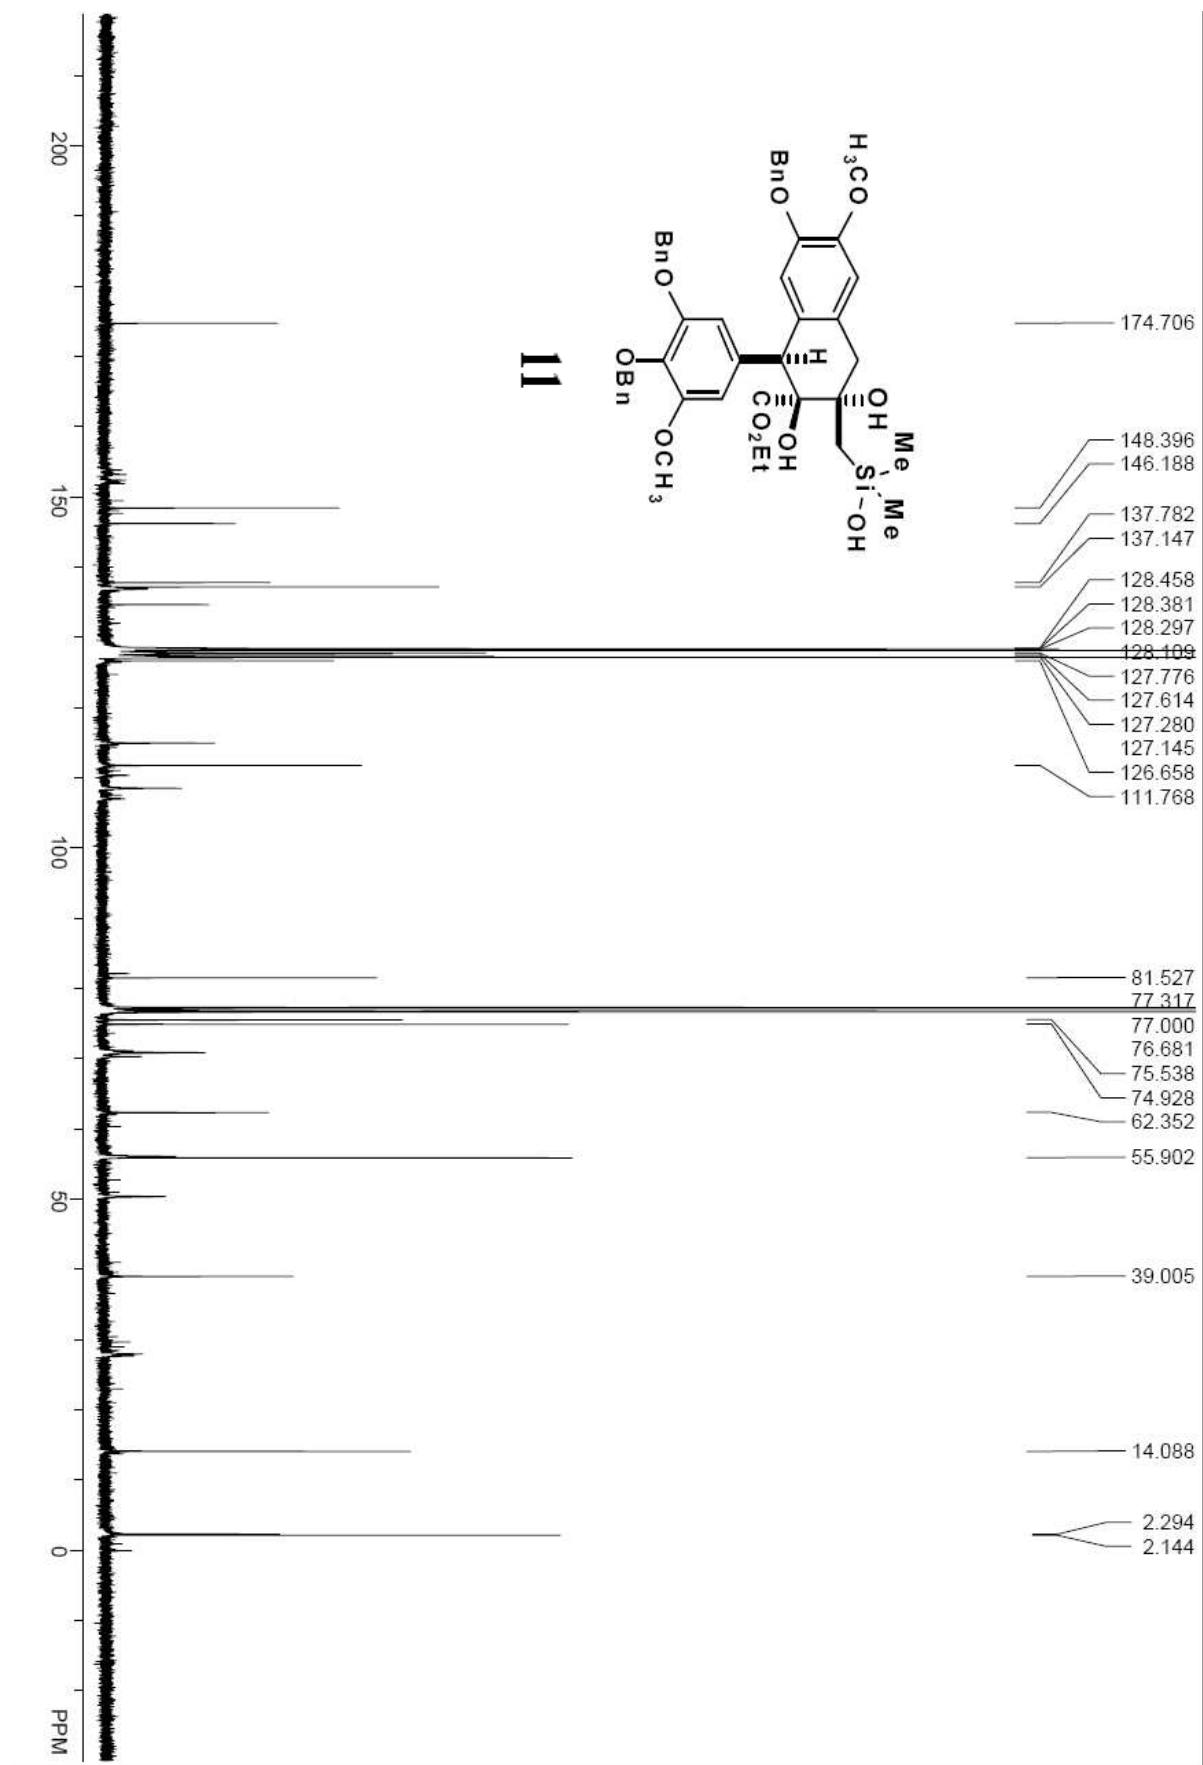

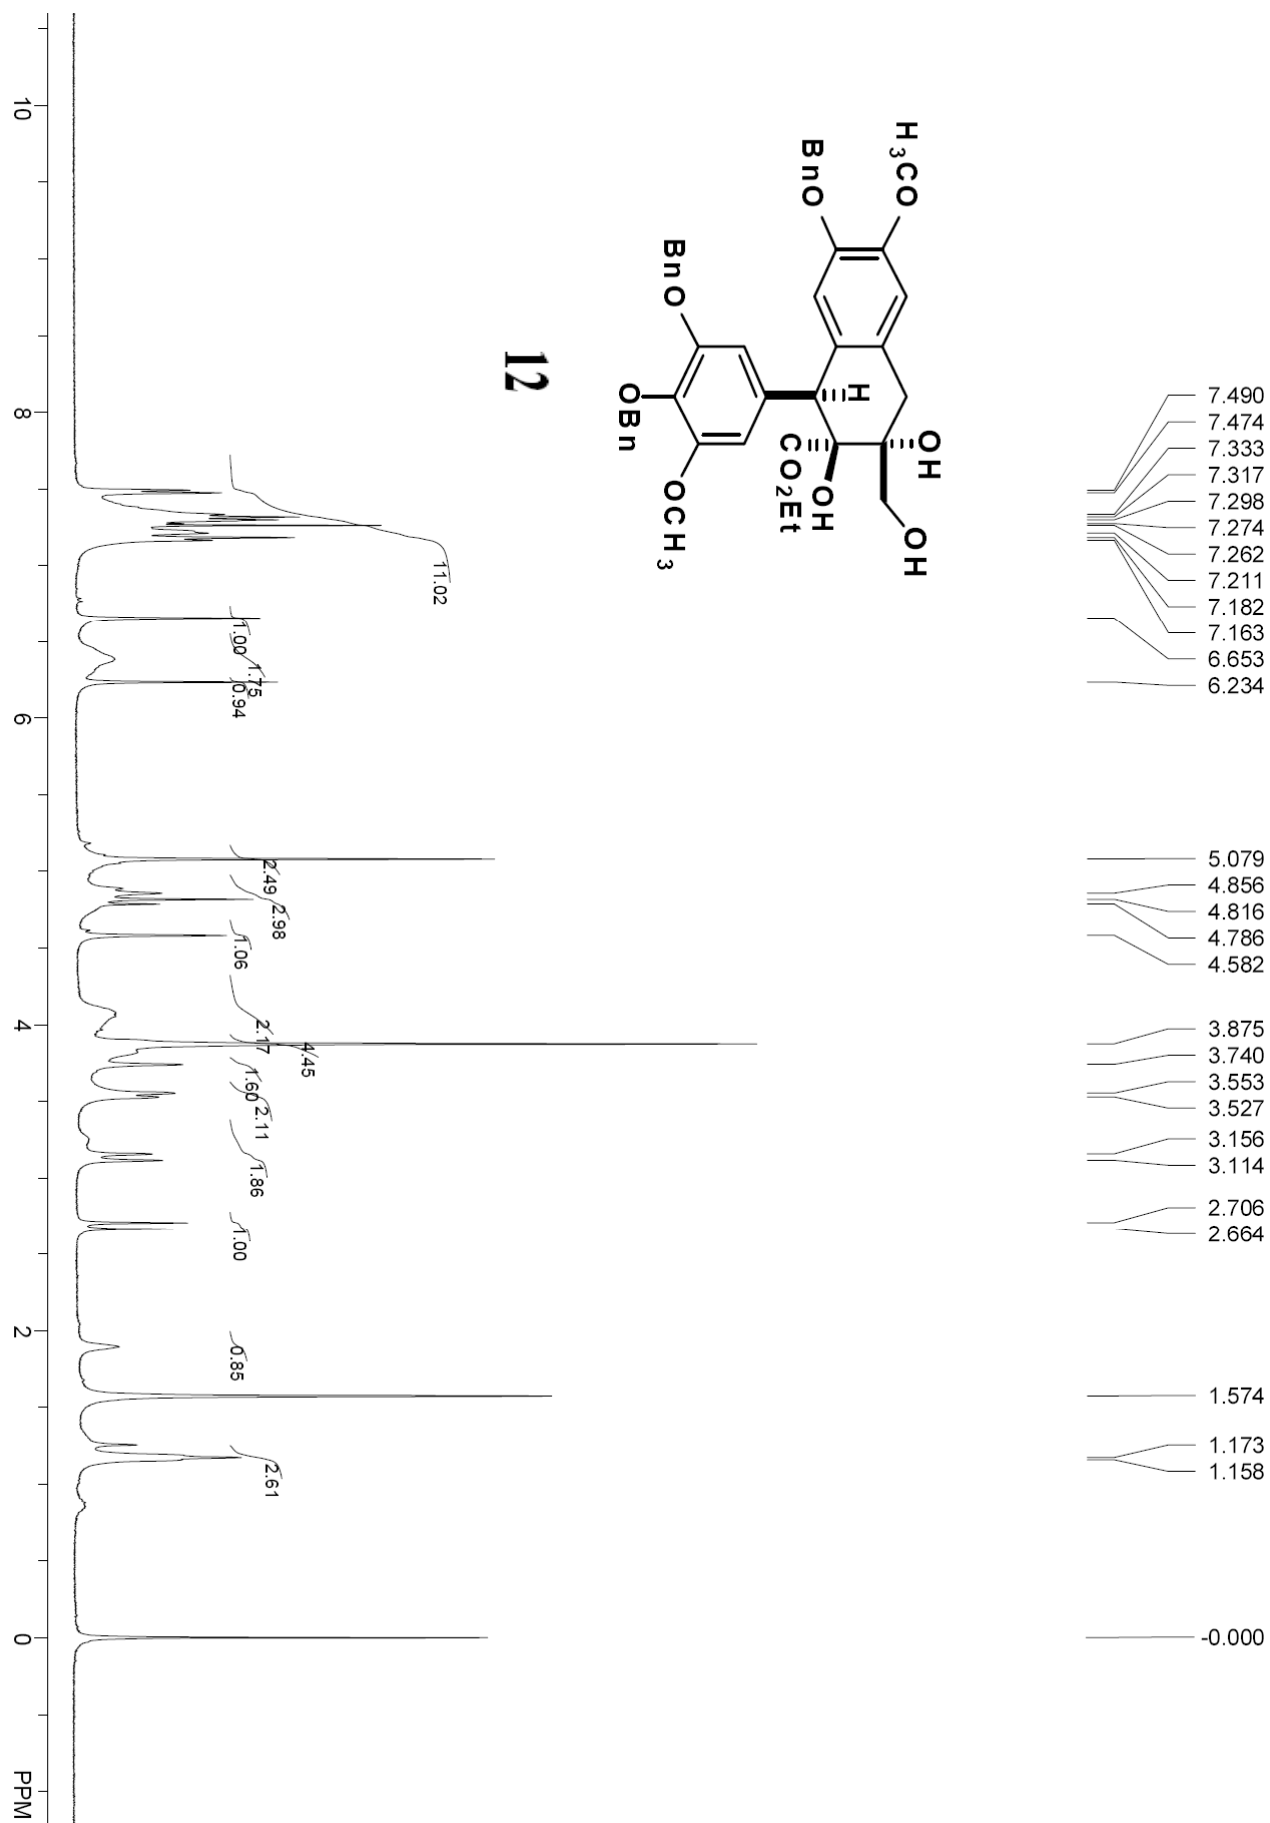

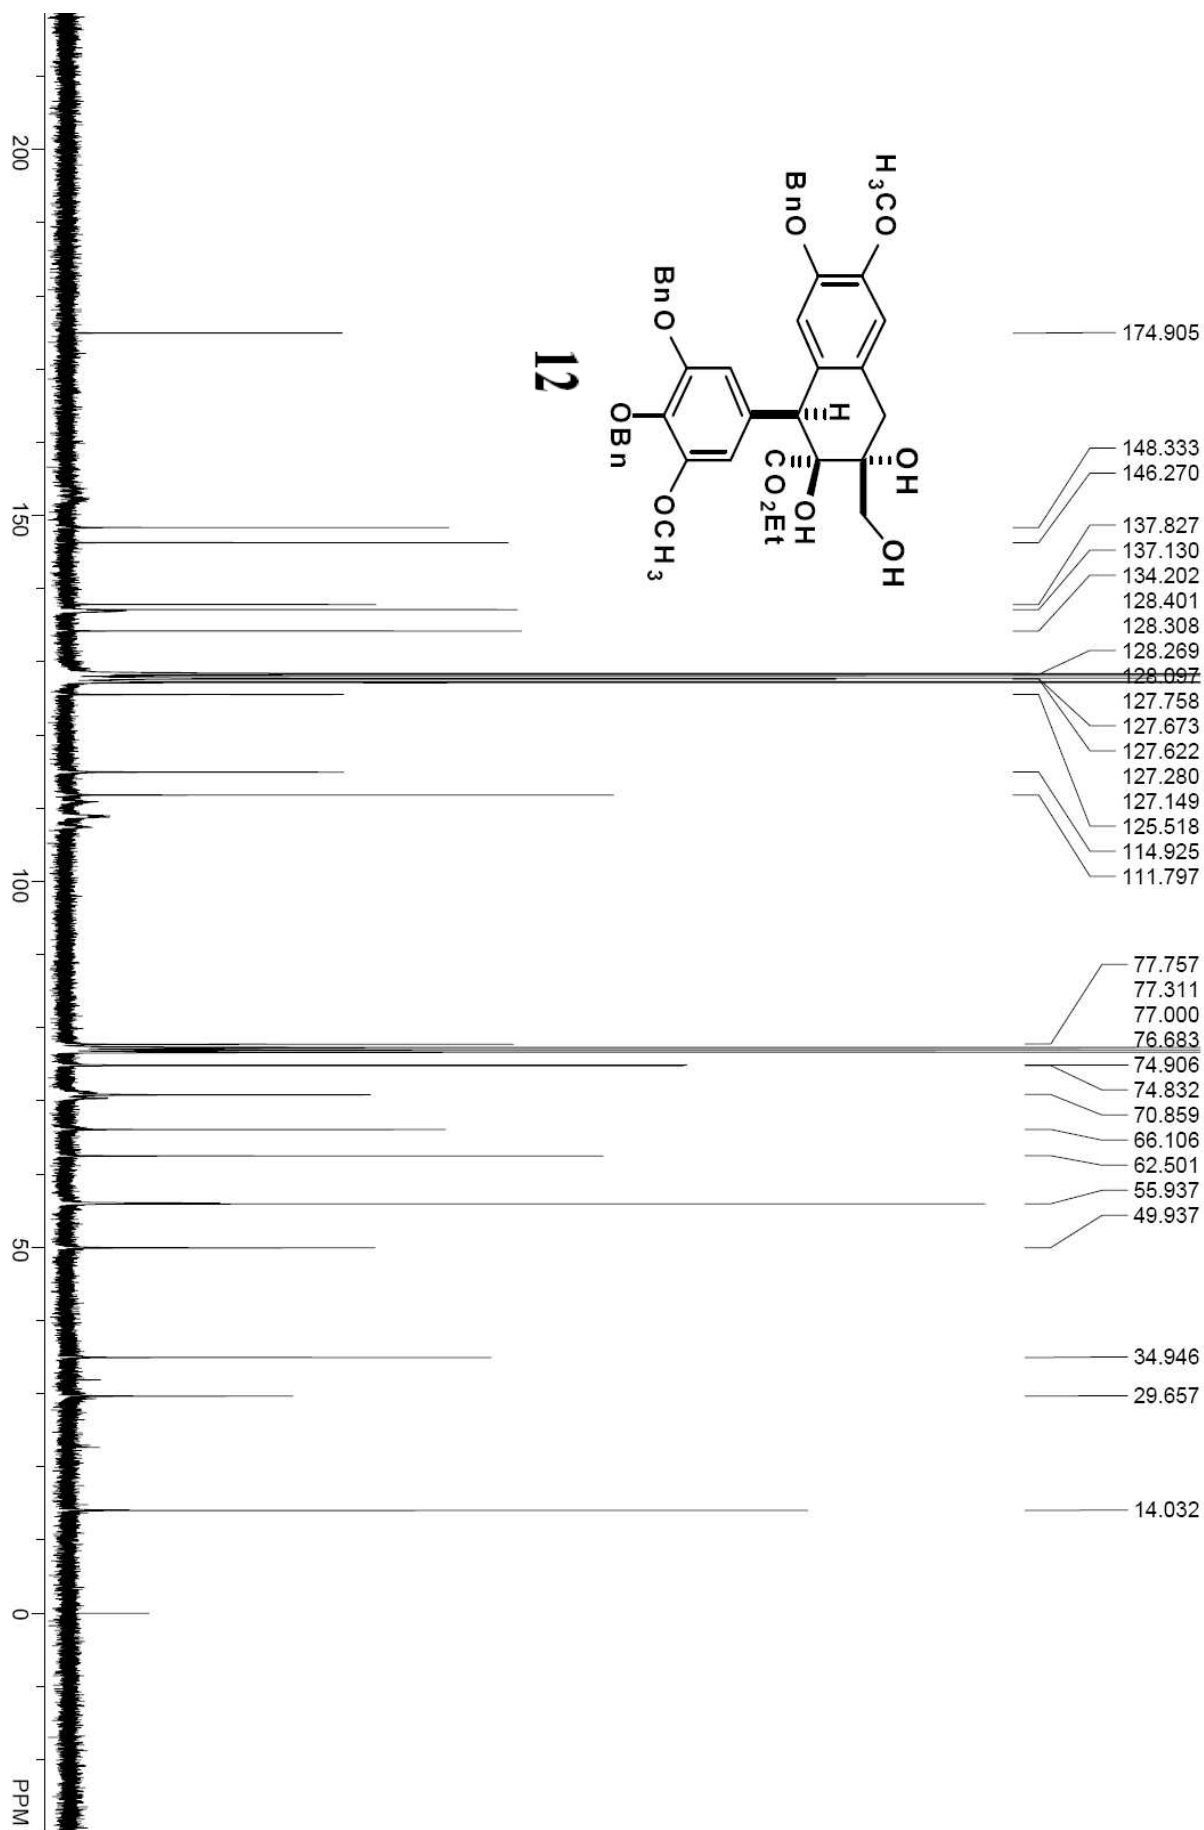



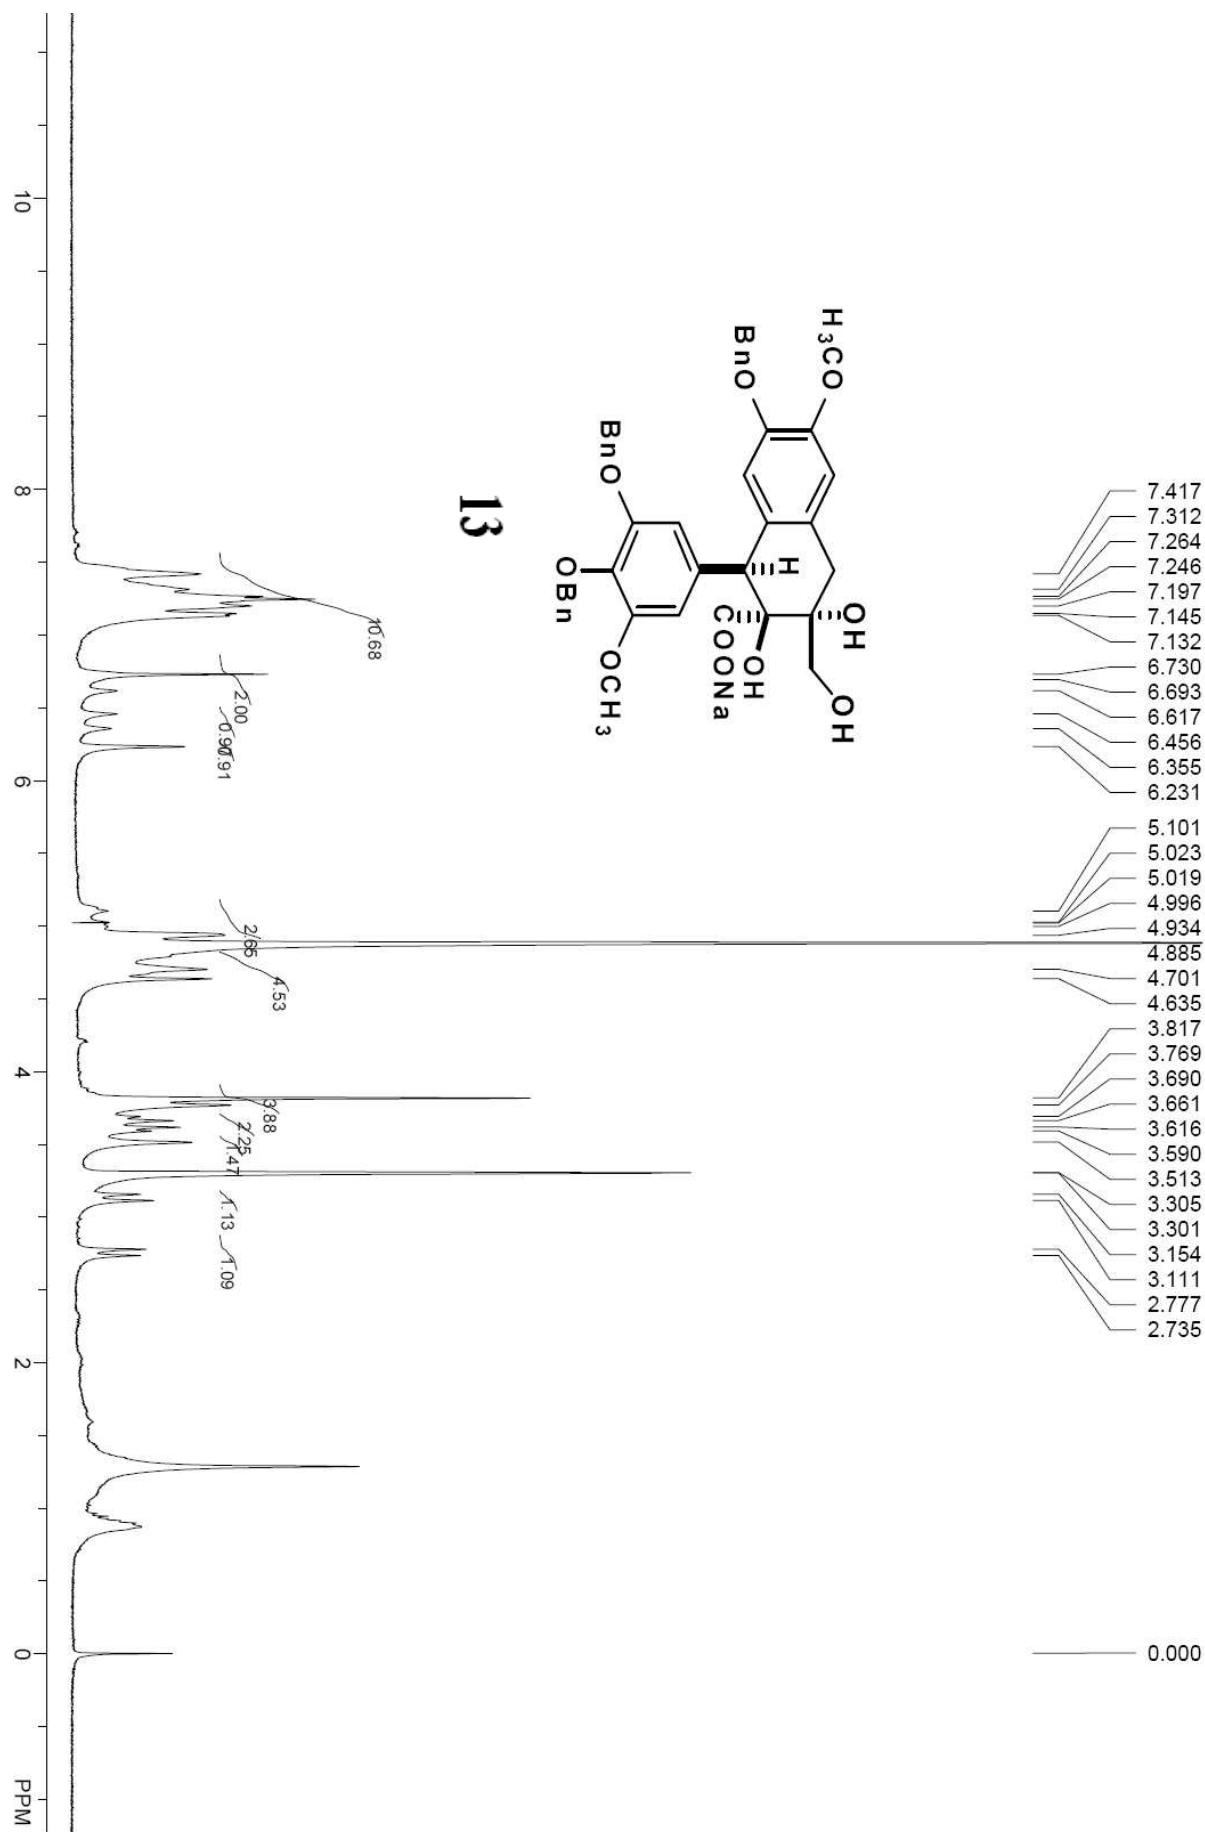

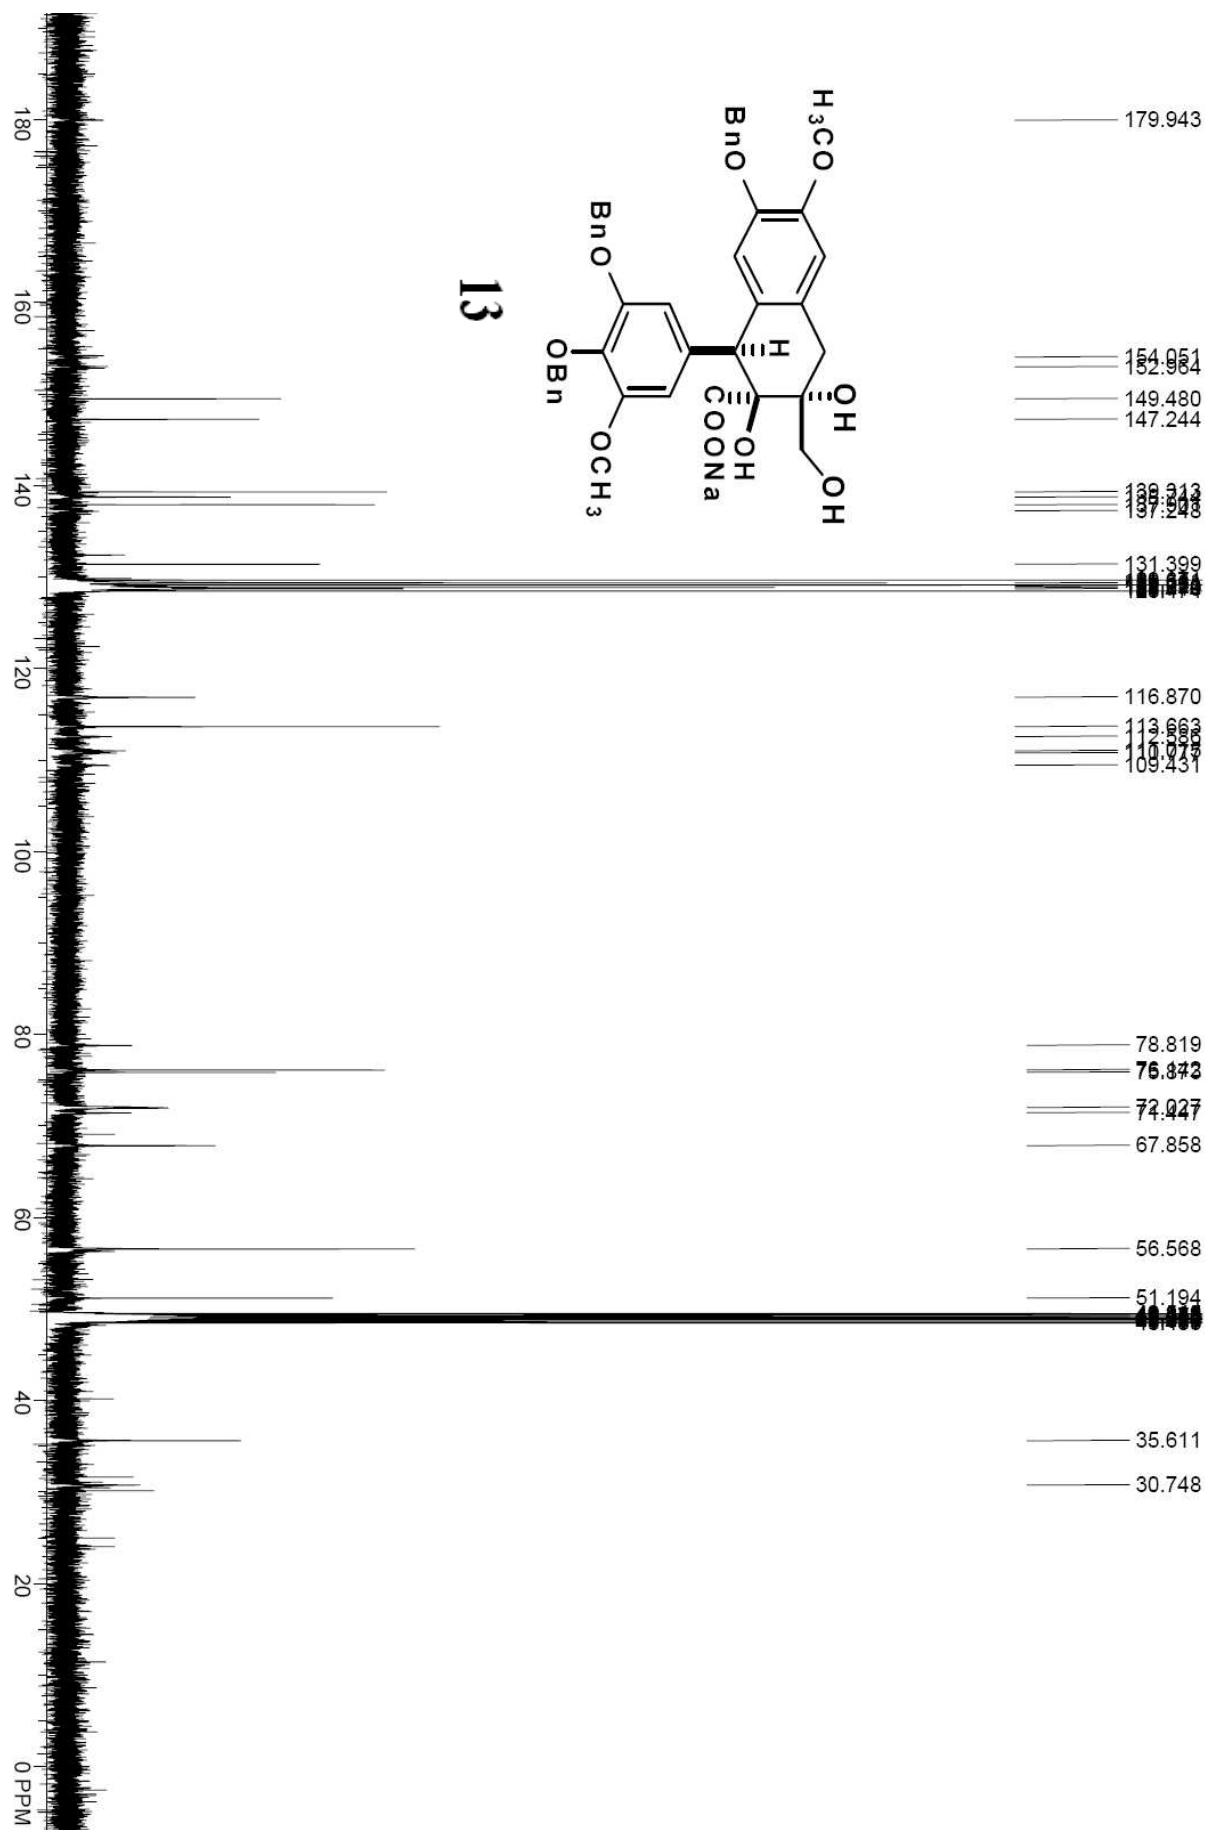



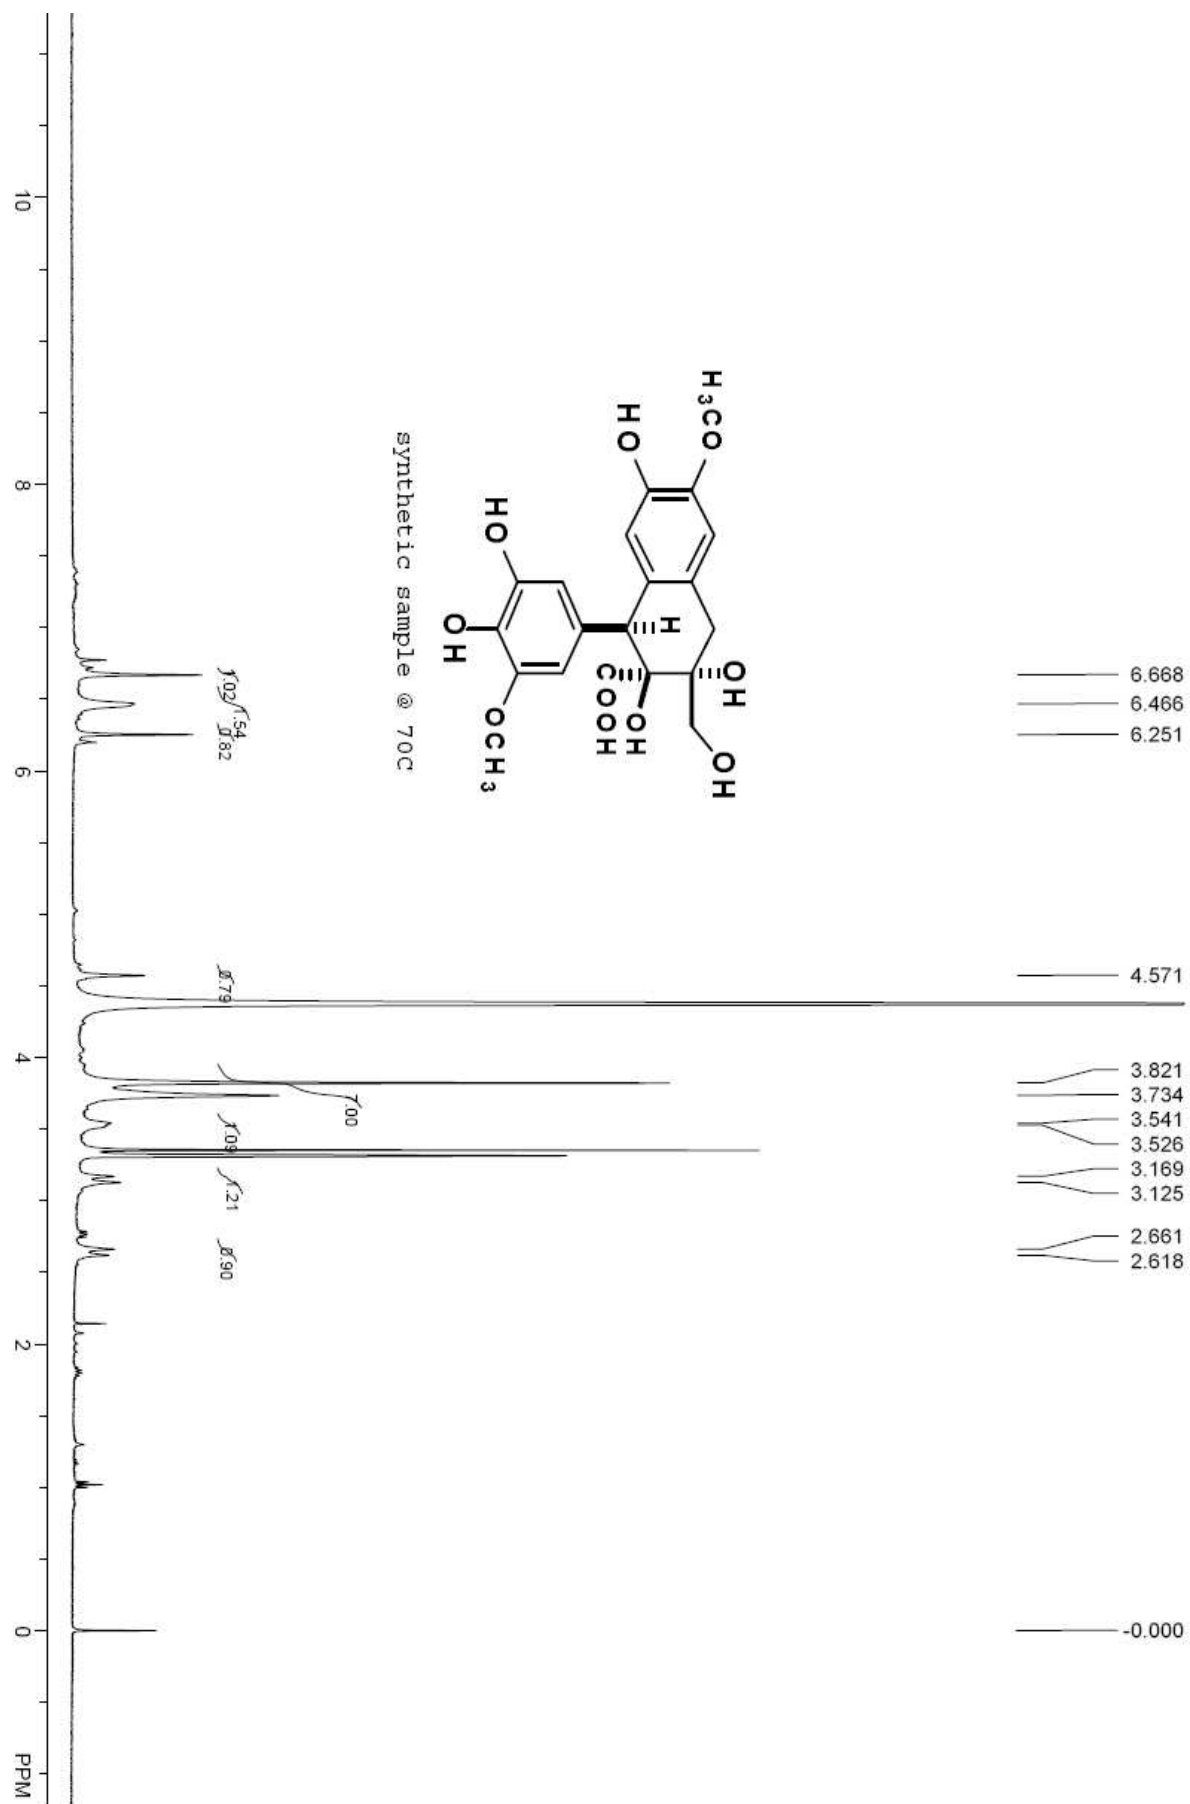

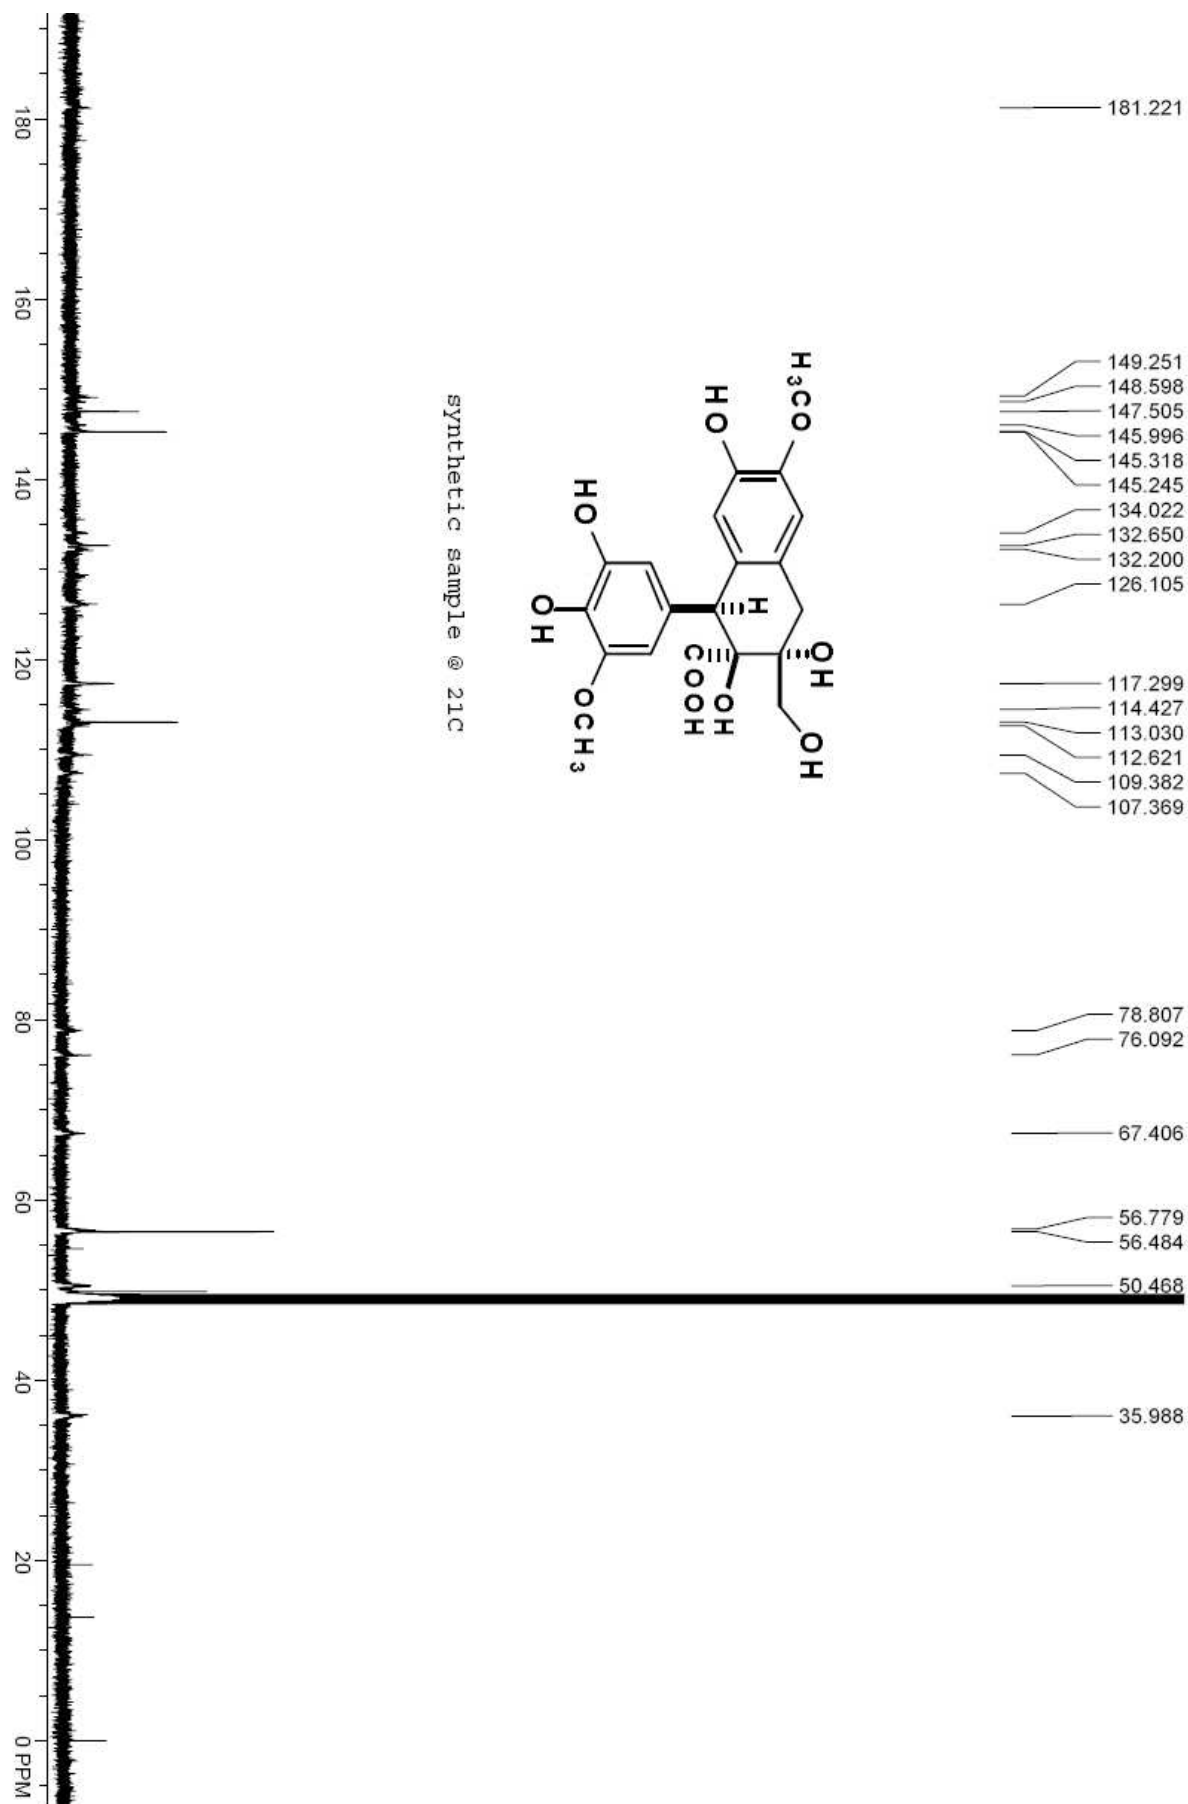

**$^{13}\text{C}$  NMR of Synthetic Sample**

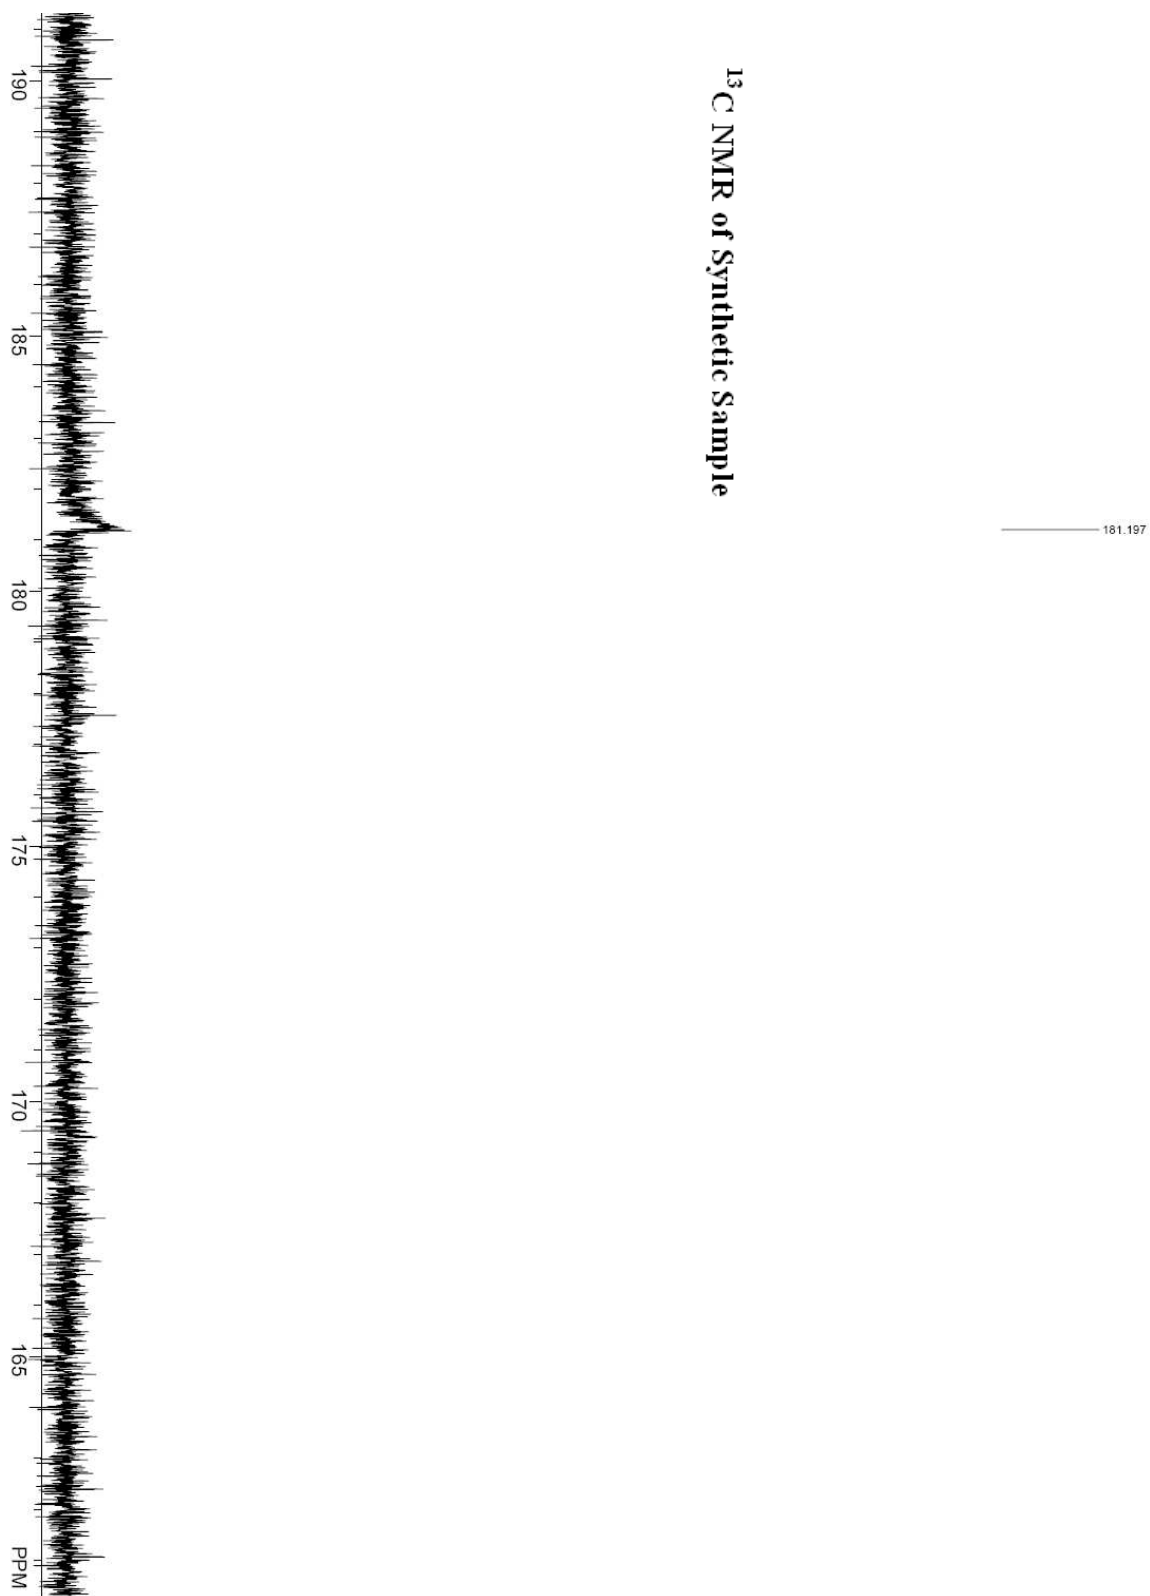

**$^{13}\text{C}$  NMR of Synthetic Sample**

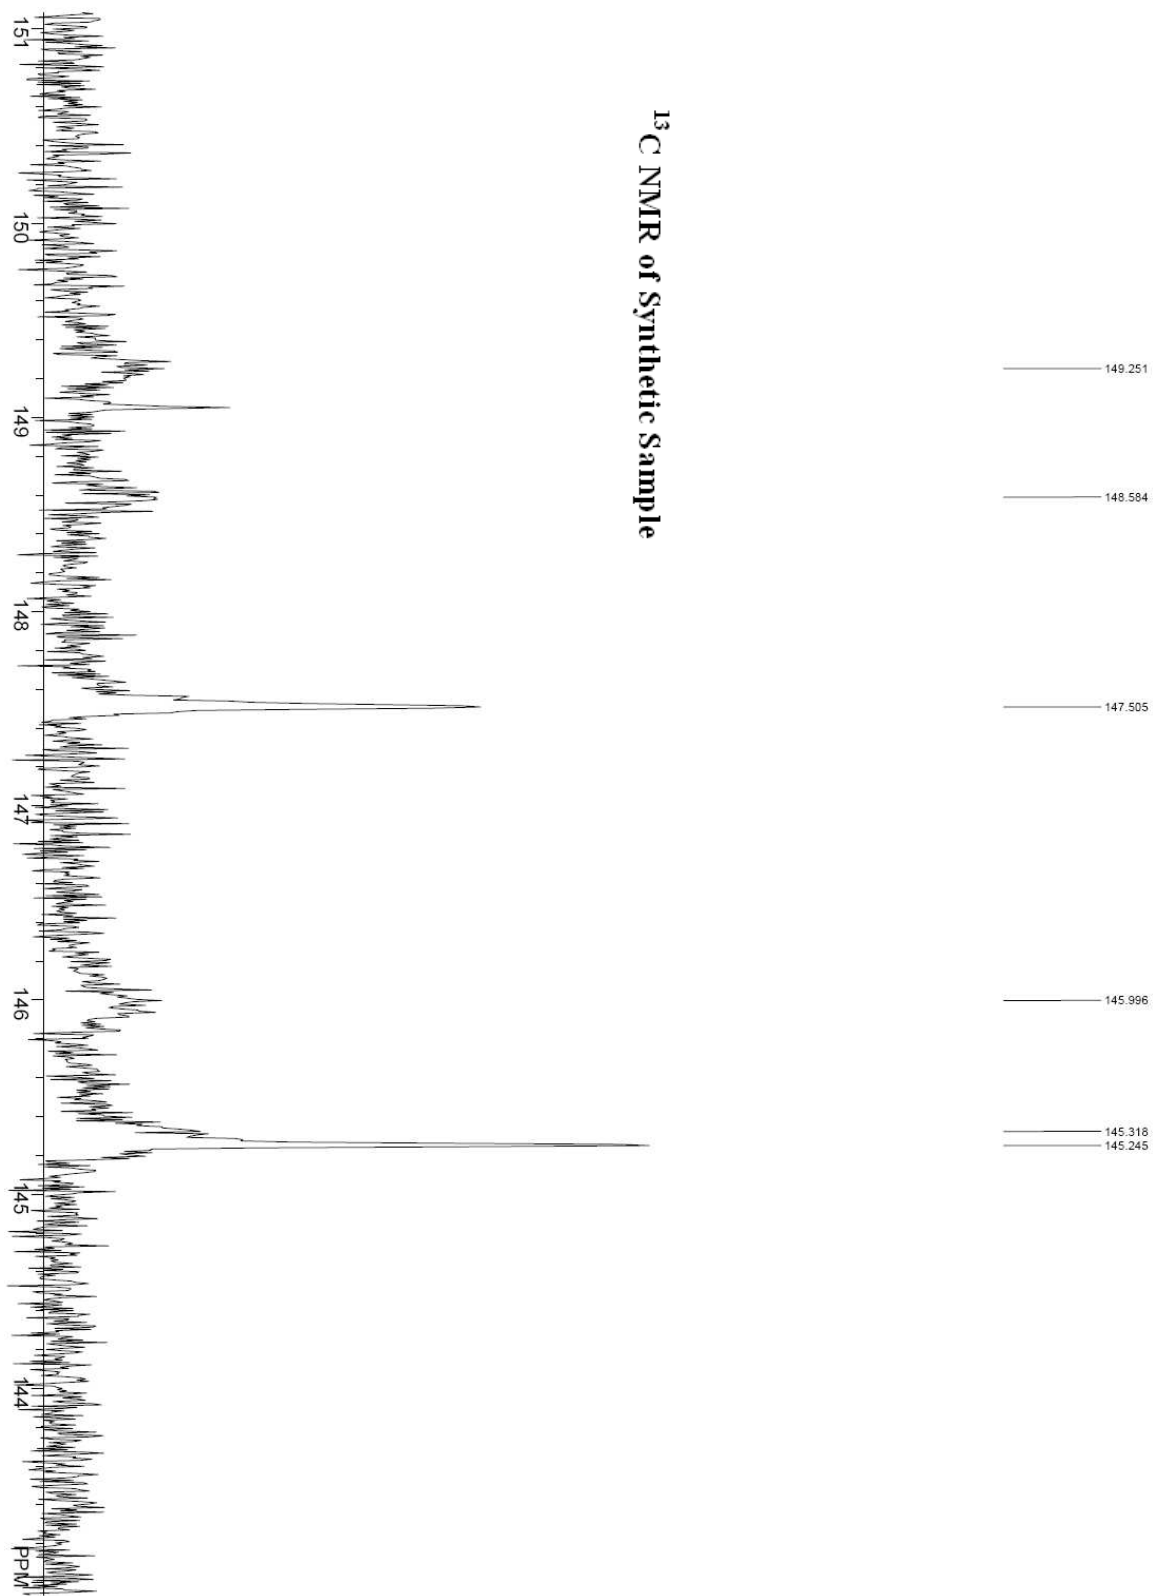

**$^{13}\text{C}$  NMR of Synthetic Sample**

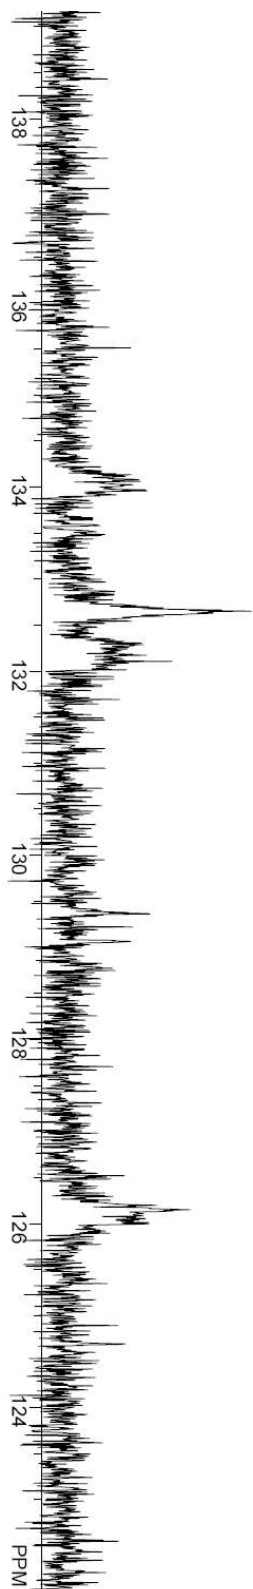

134.022

132.650

132.180

126.114



**$^{13}\text{C}$  NMR of Synthetic Sample**

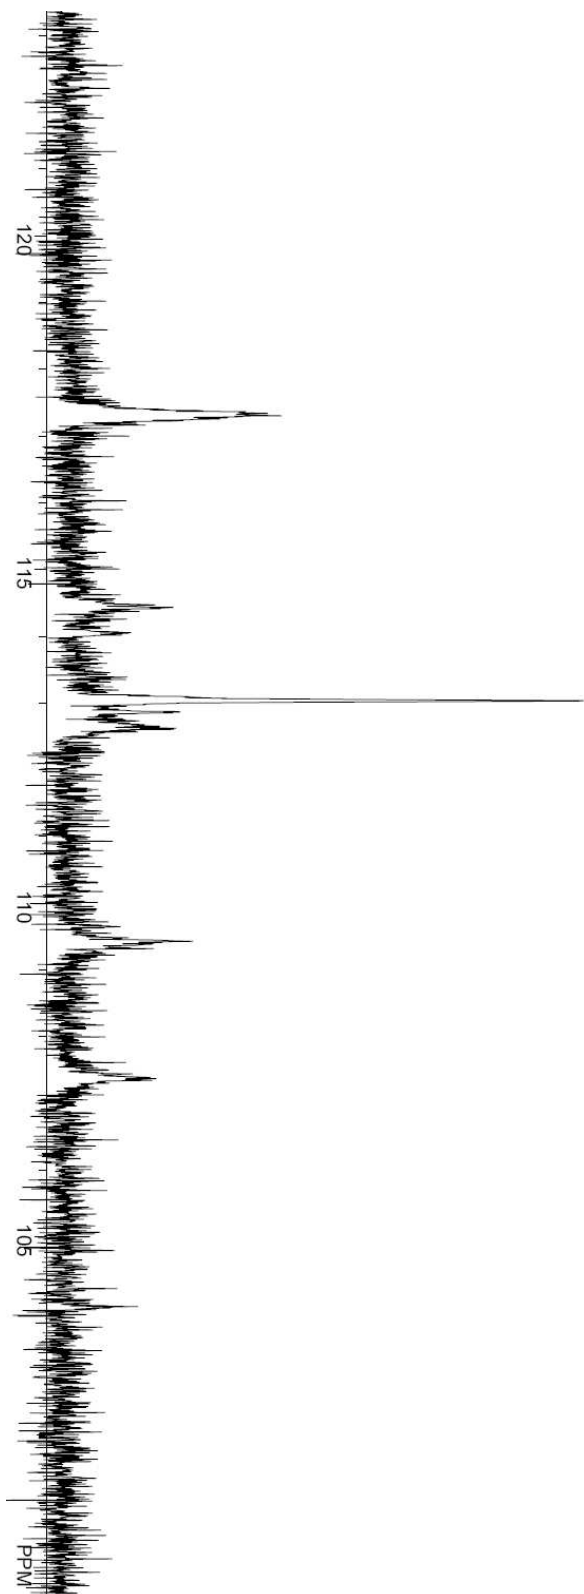

|         |
|---------|
| 117.299 |
| 114.426 |
| 113.029 |
| 112.621 |
| 109.382 |
| 107.368 |

**$^{13}\text{C}$  NMR of Synthetic Sample**

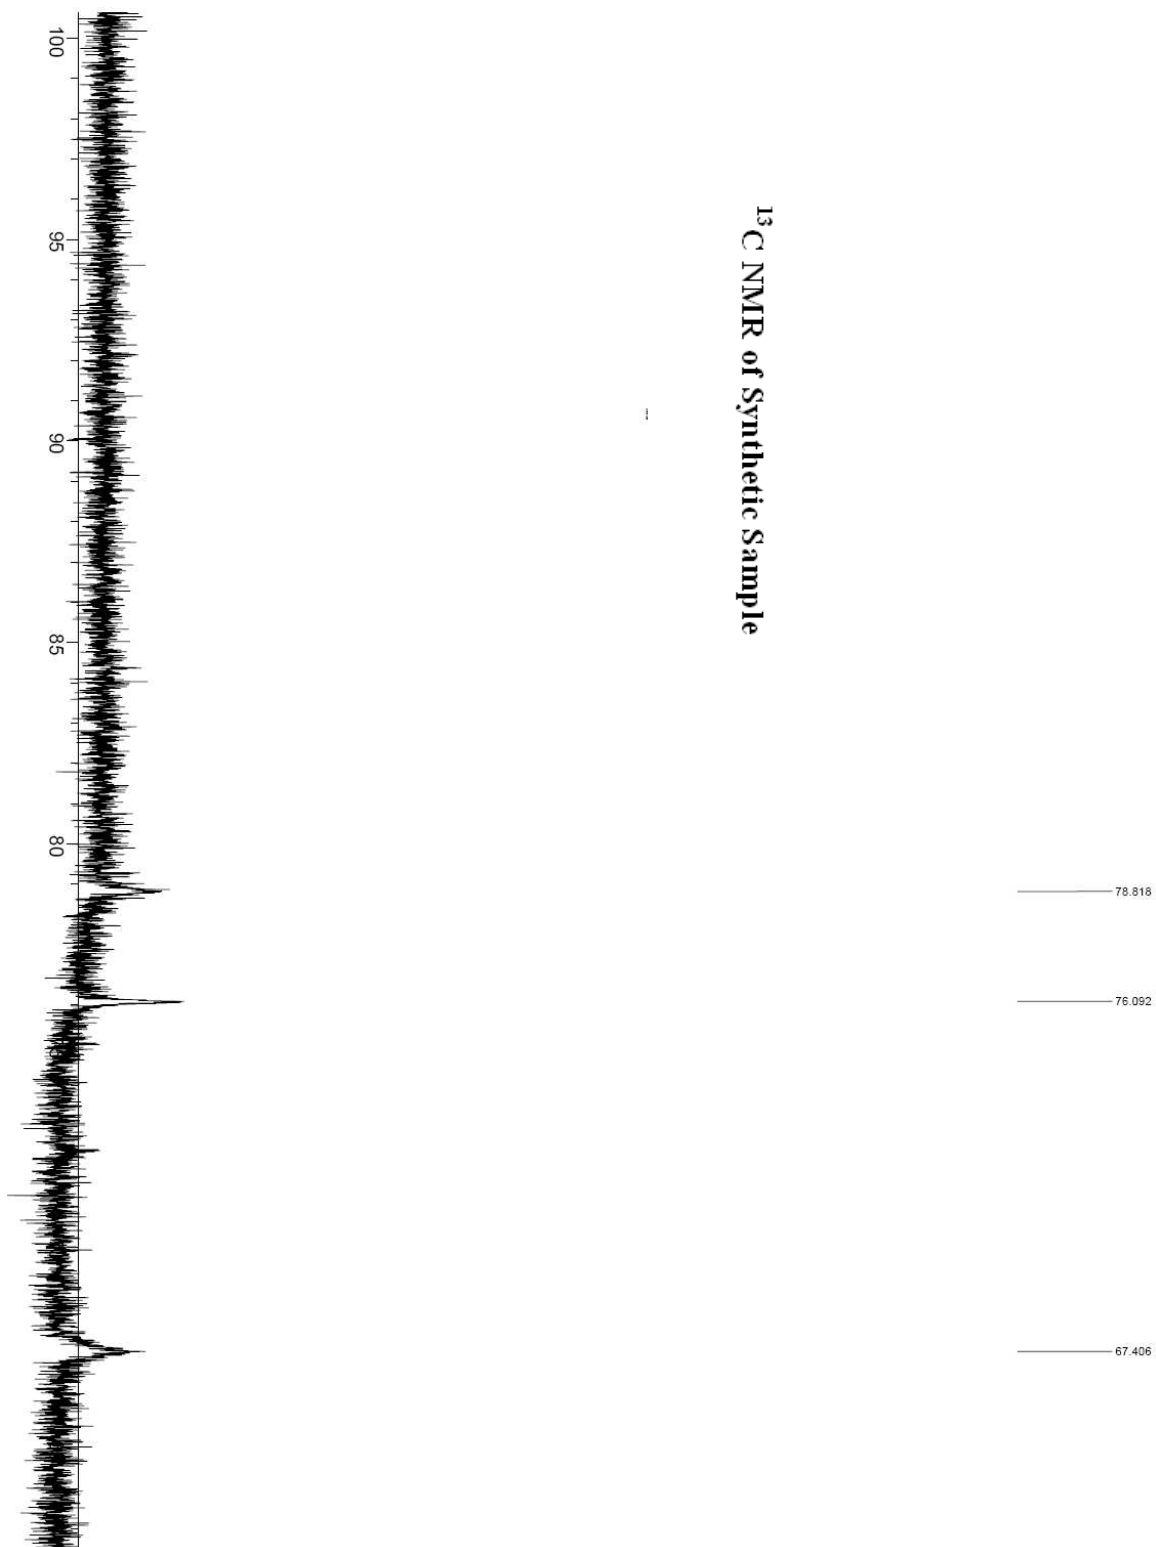

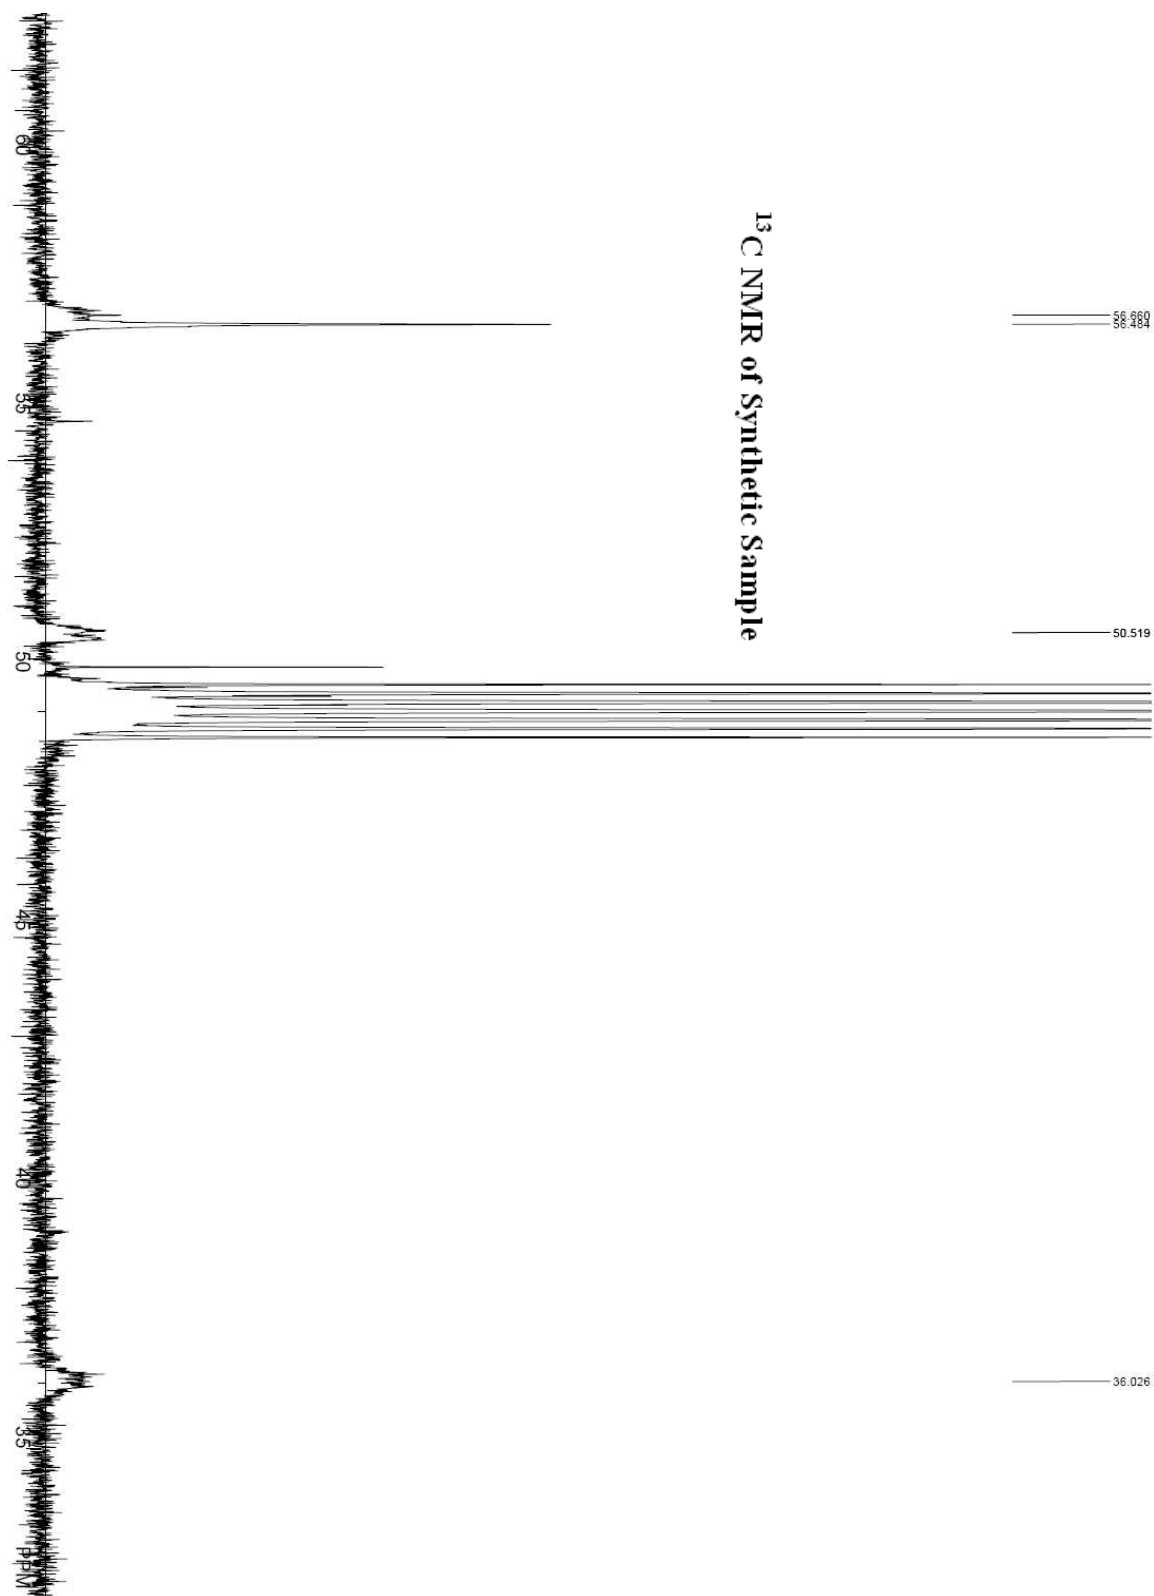

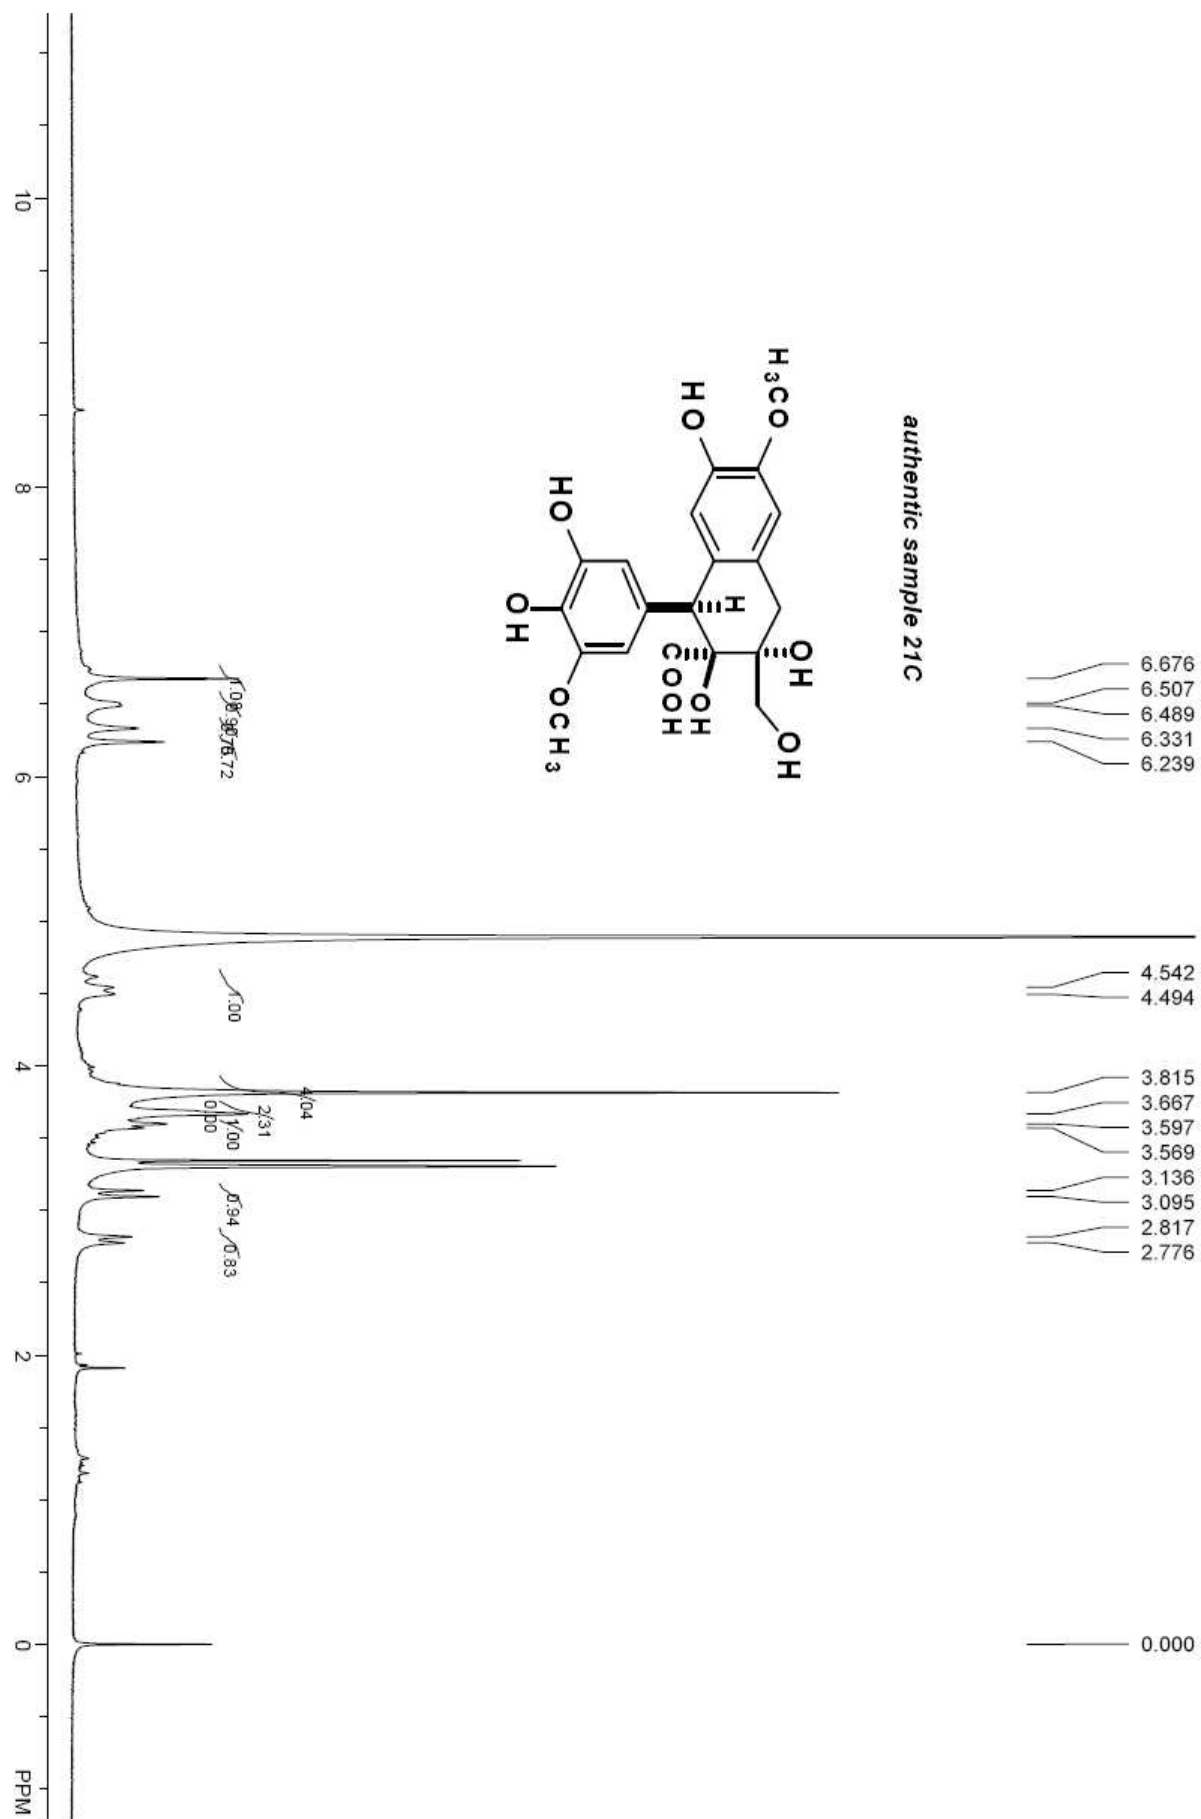



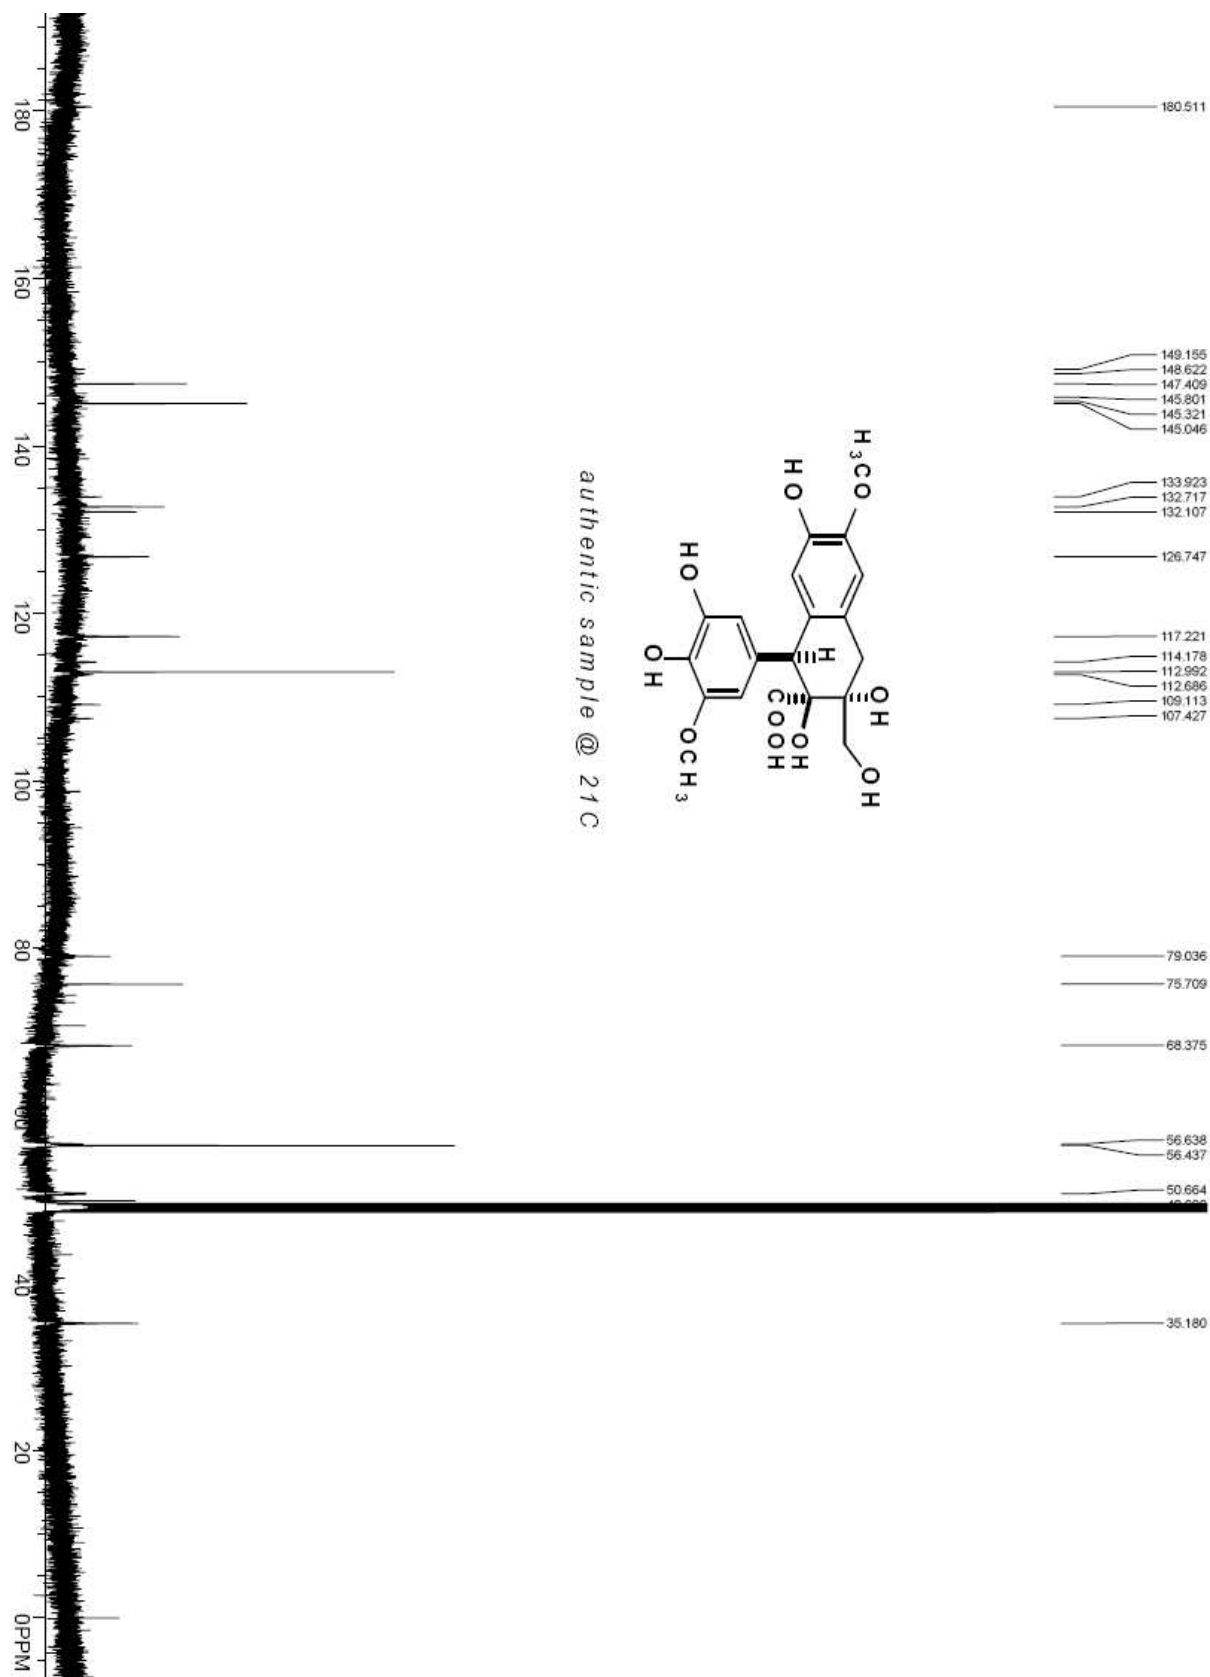

**$^{13}\text{C}$  NMR of Authentic Sample**

180.519

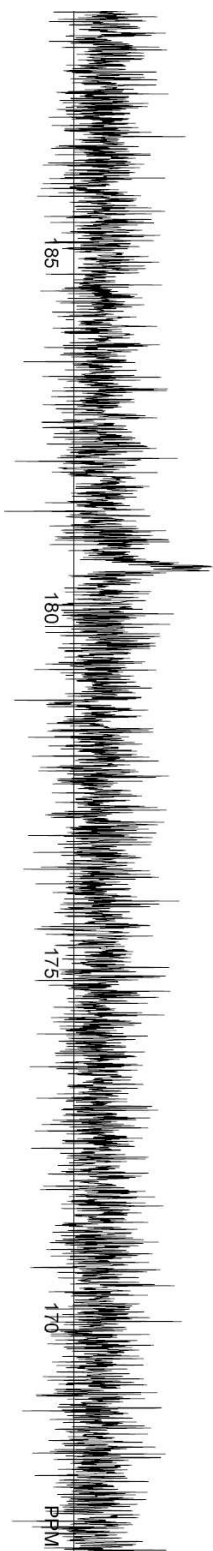

**$^{13}\text{C}$  NMR of Authentic Sample**

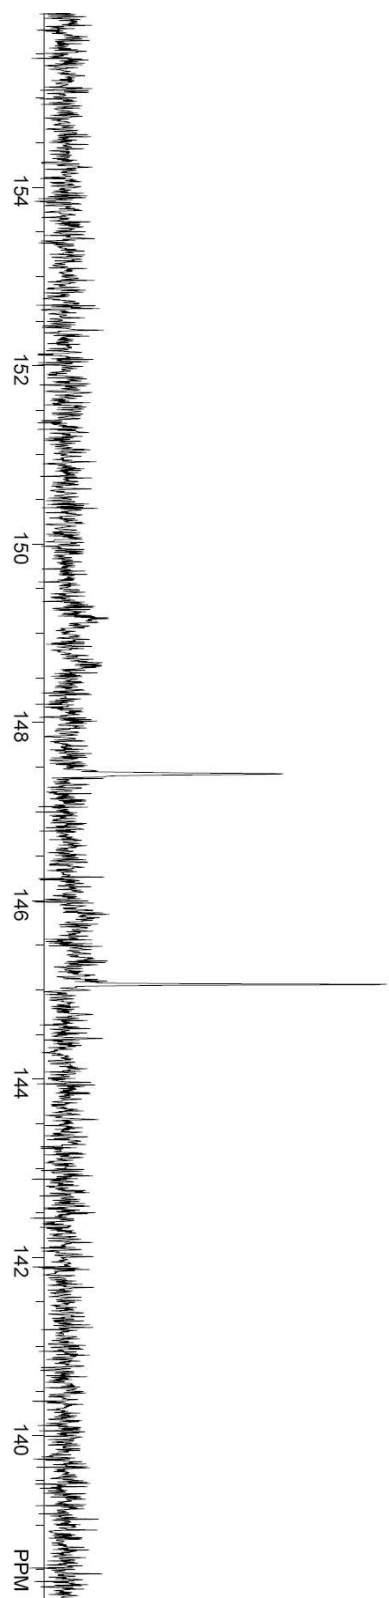

- 149.142
- 148.666
- 147.420
- 145.795
- 145.375
- 145.058



**$^{13}\text{C}$  NMR of Authentic Sample**

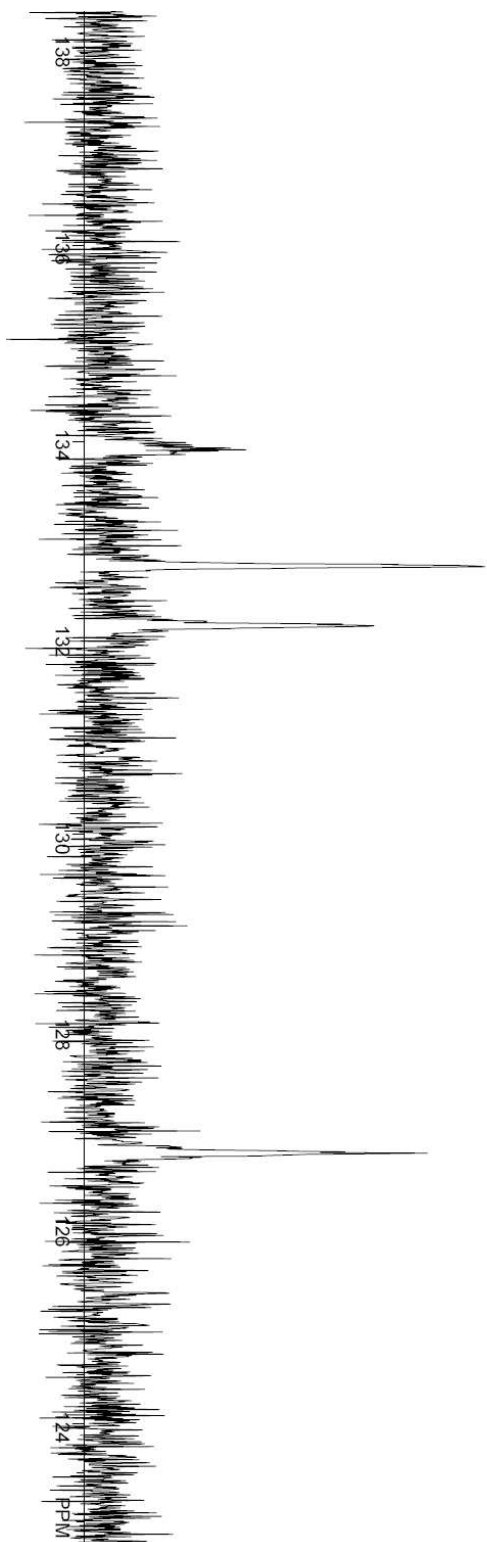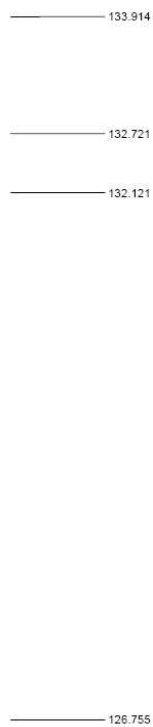

**$^{13}\text{C}$  NMR of Authentic Sample**

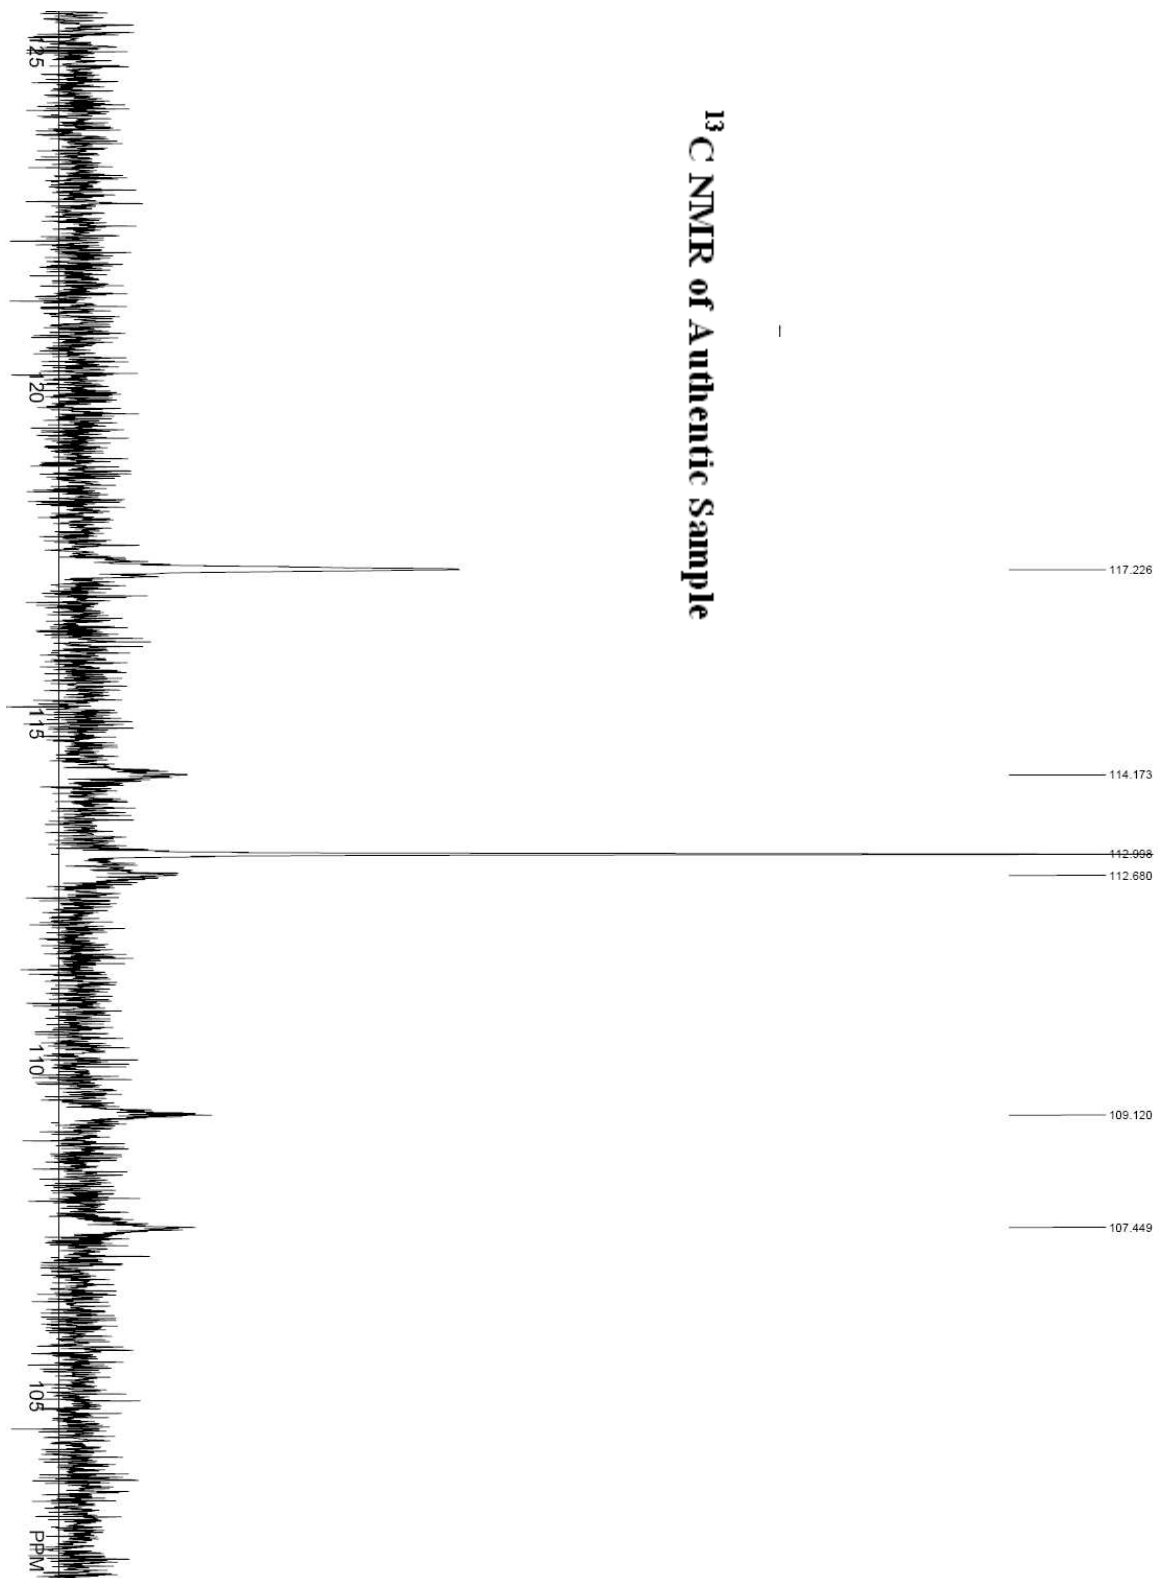

**$^{13}\text{C}$  NMR of Authentic Sample**

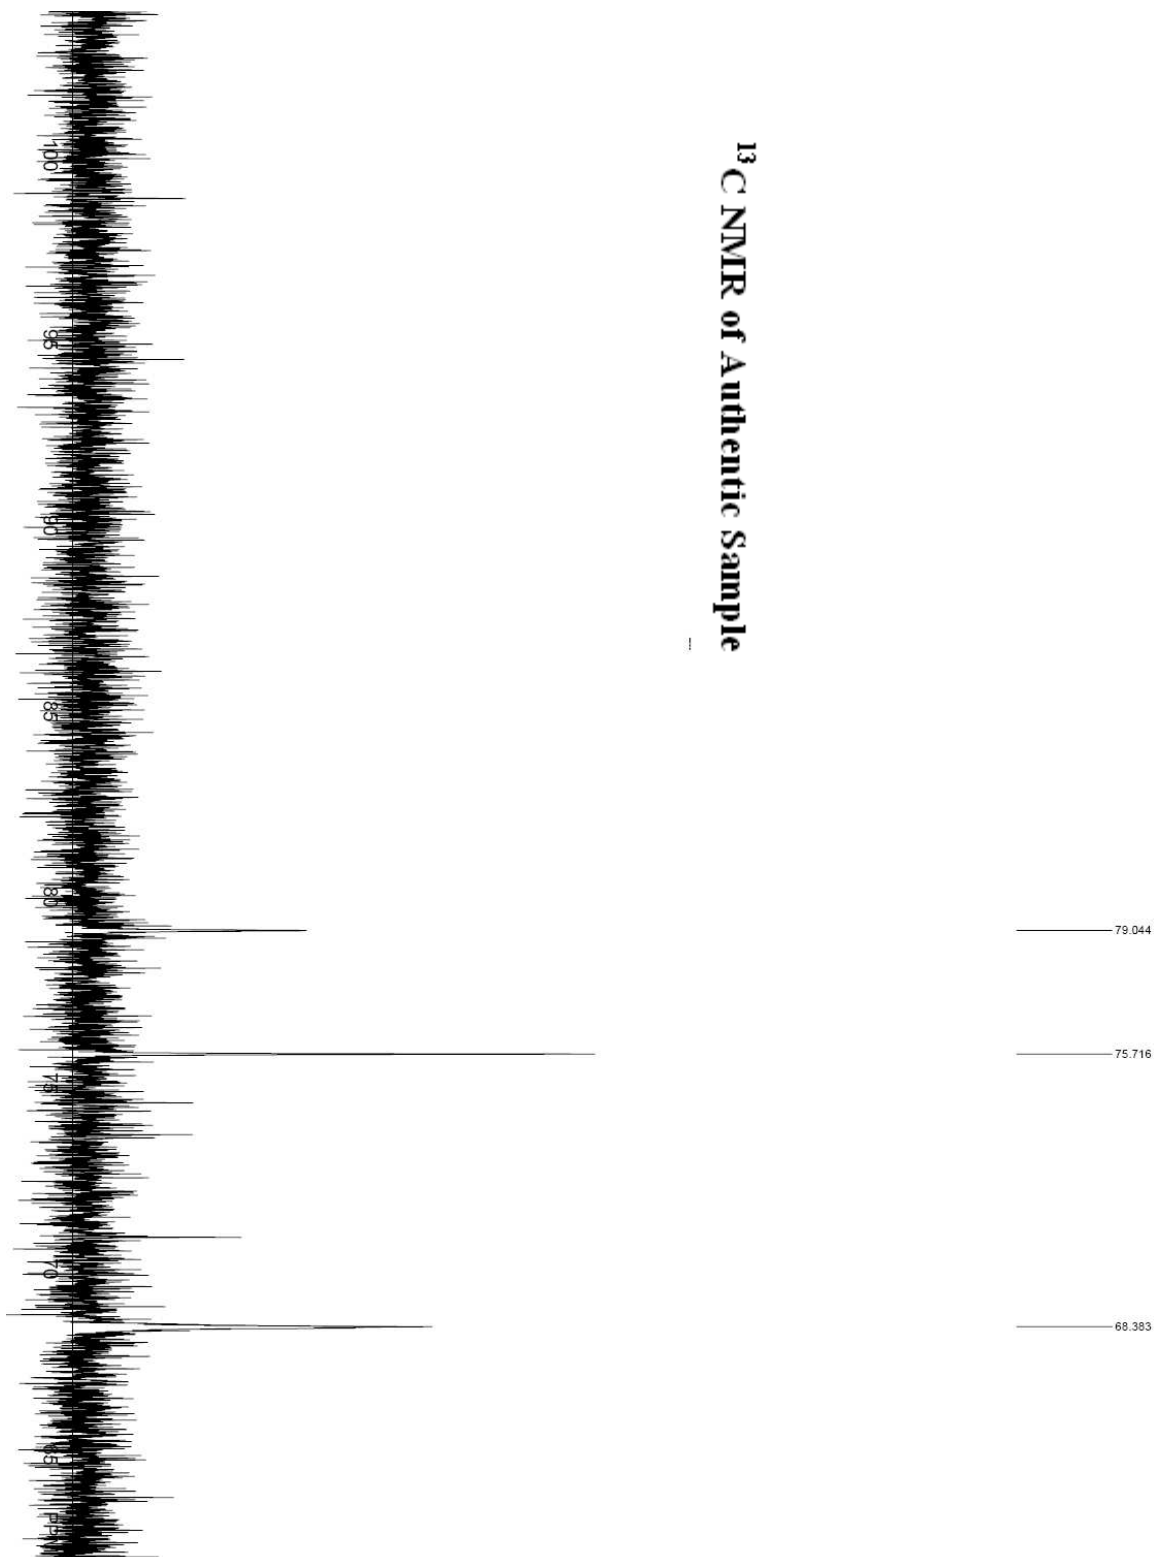

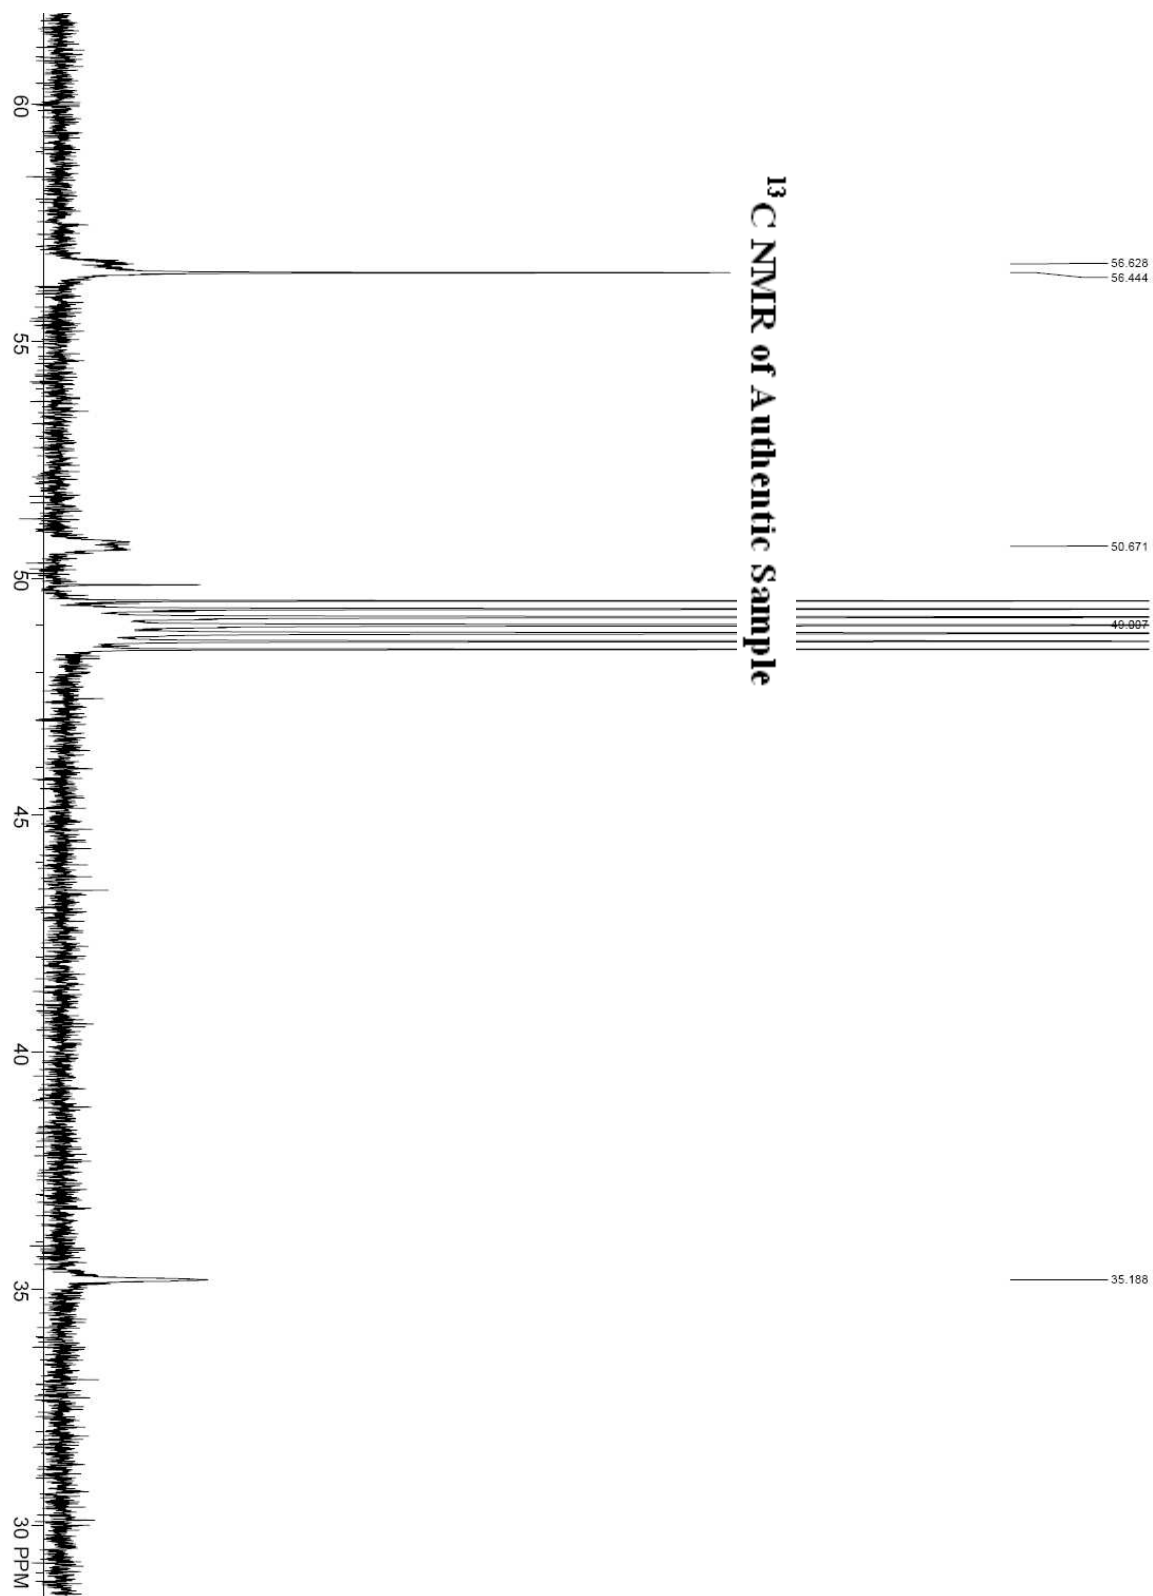



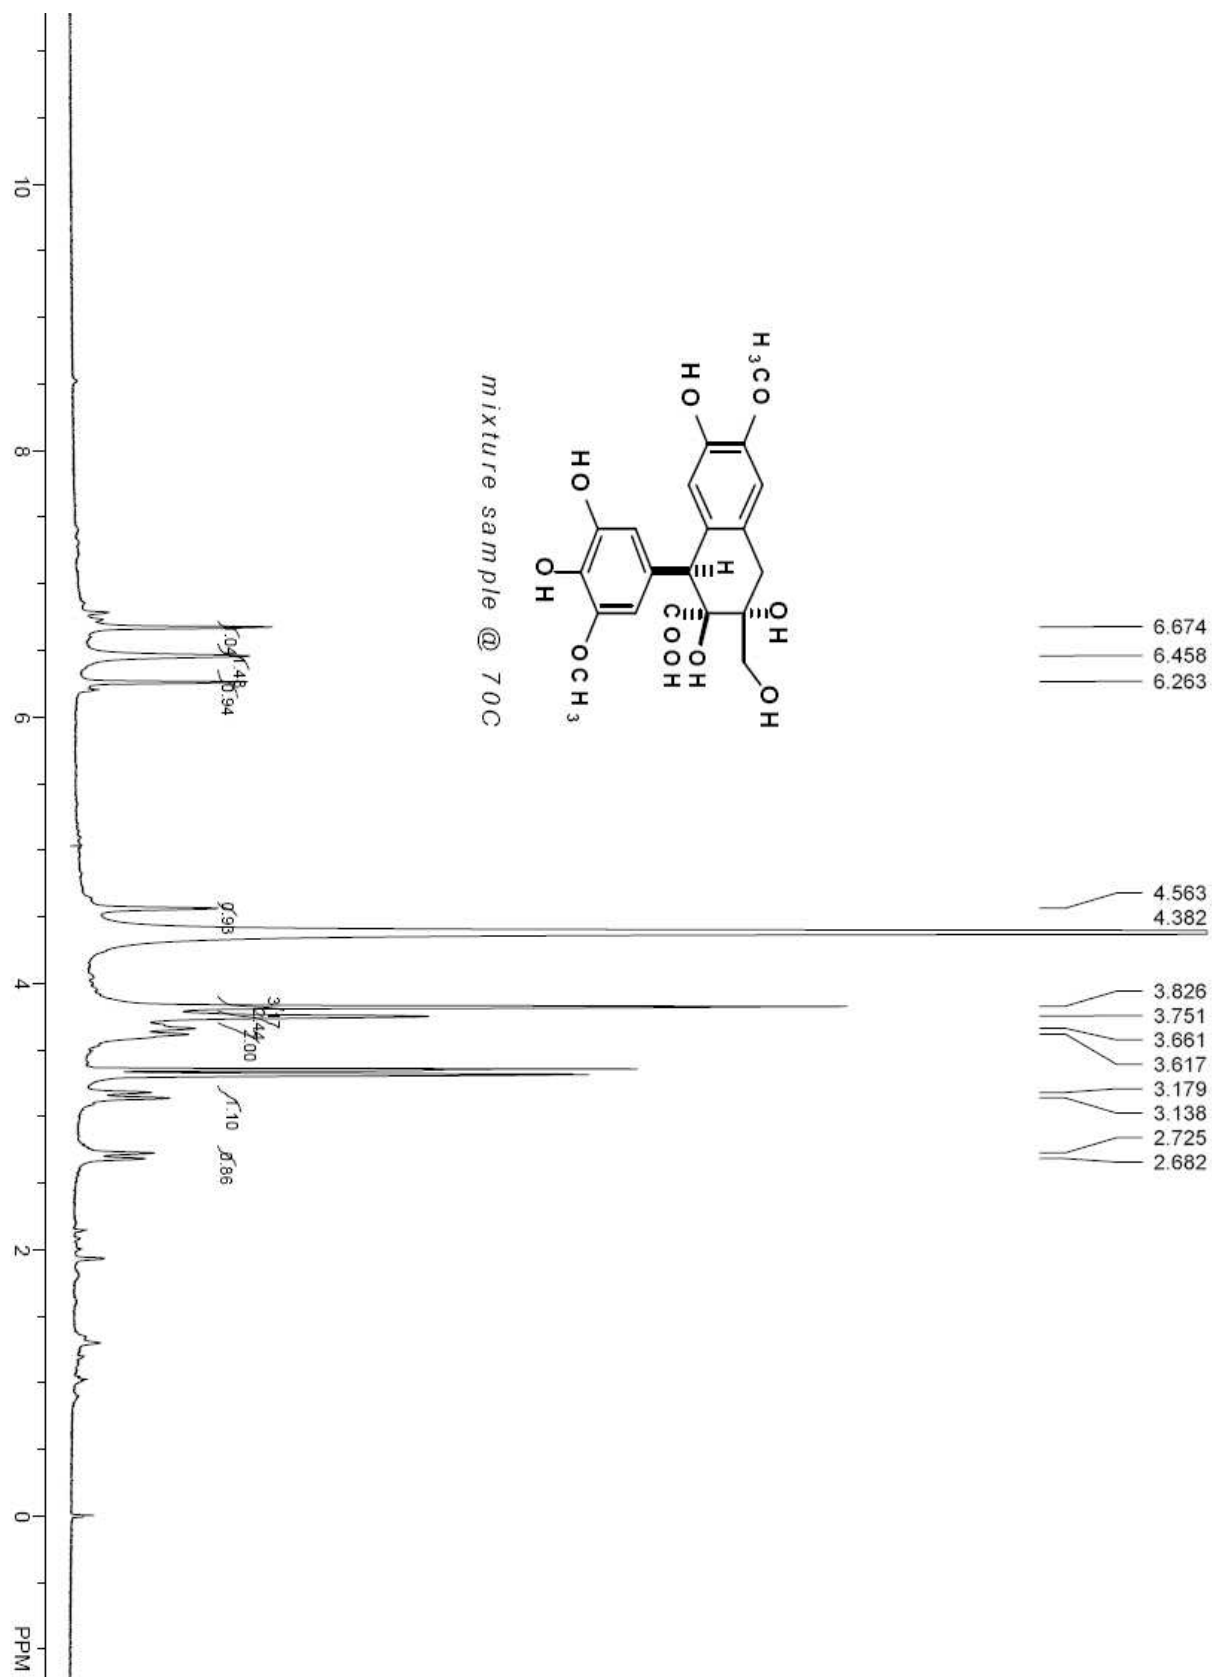

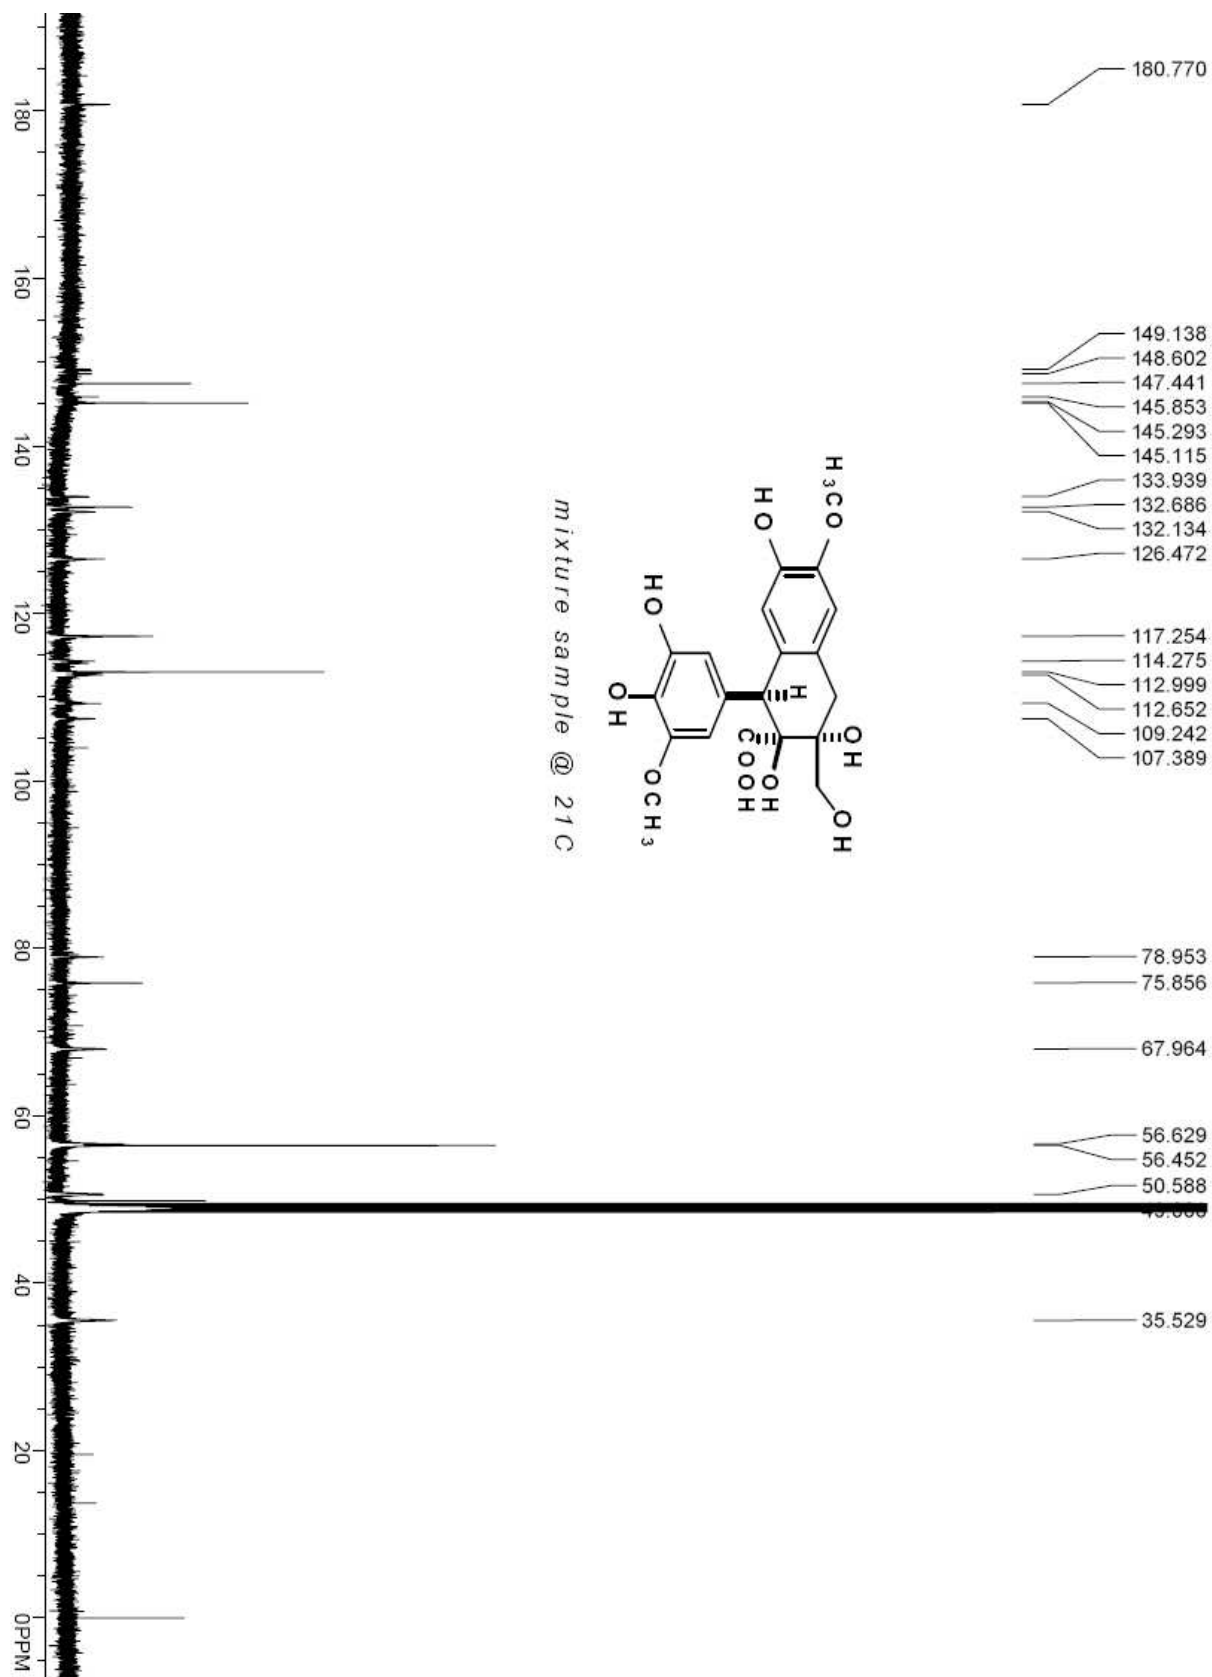

**$^{13}\text{C}$  NMR of Mixture Sample**

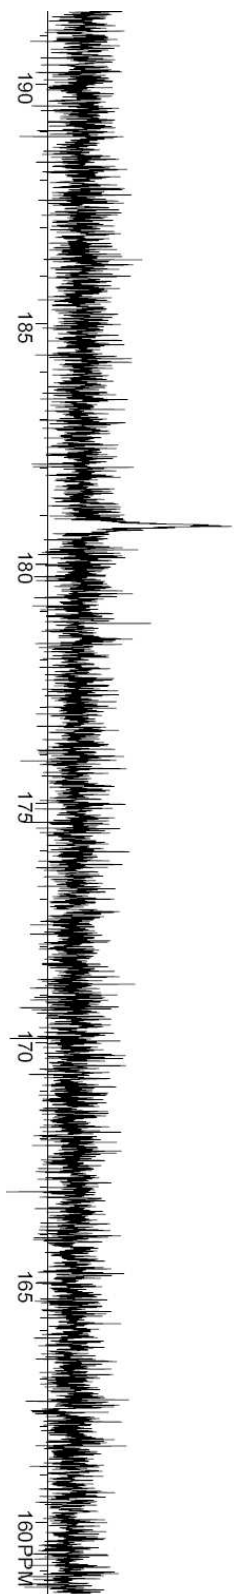

180.772



**$^{13}\text{C}$  NMR of Mixture Sample**

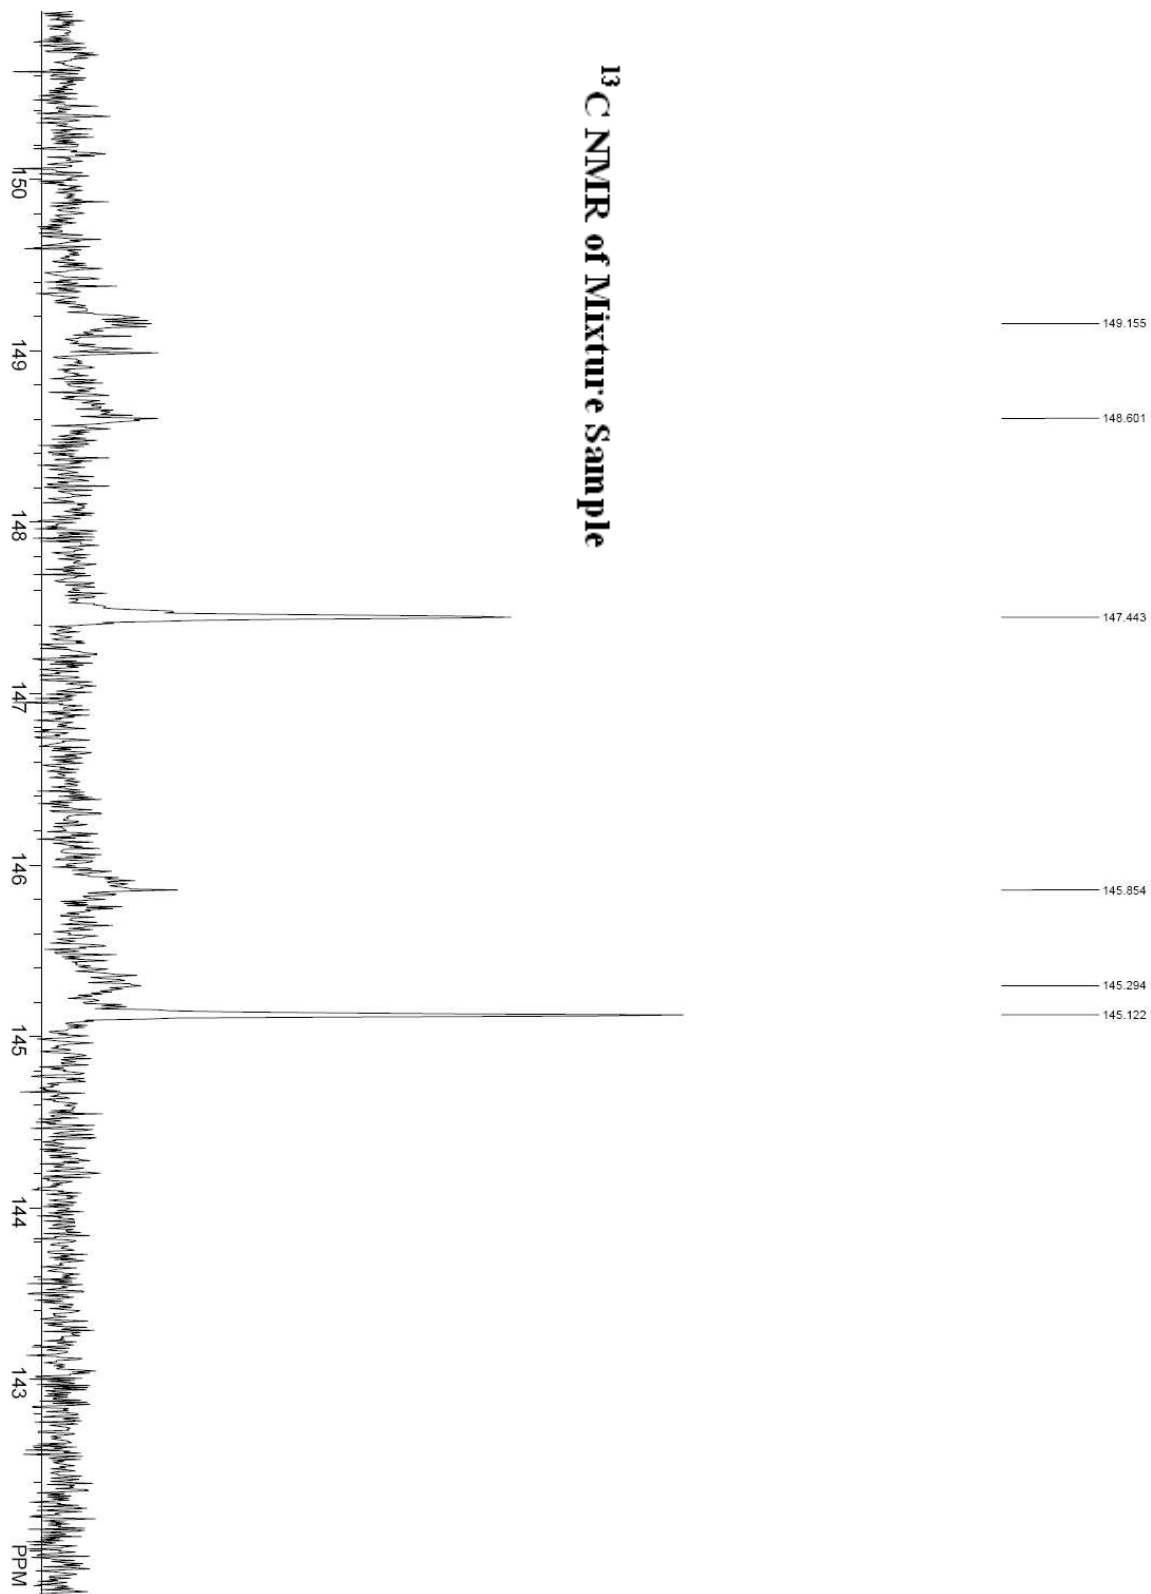

**$^{13}\text{C}$  NMR of Mixture Sample**

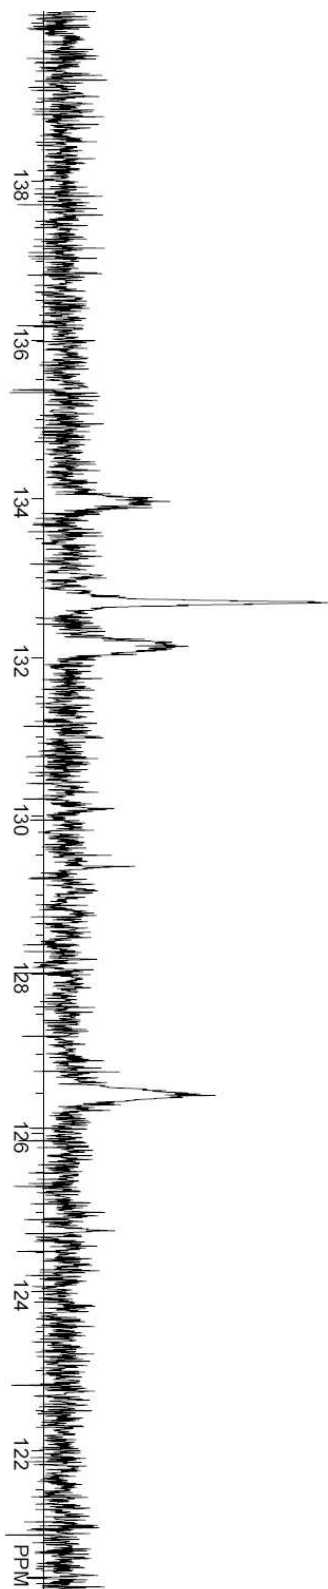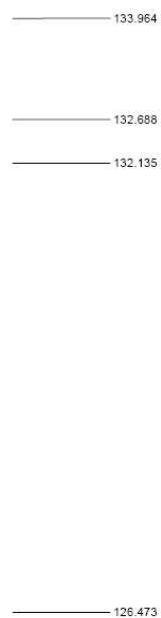

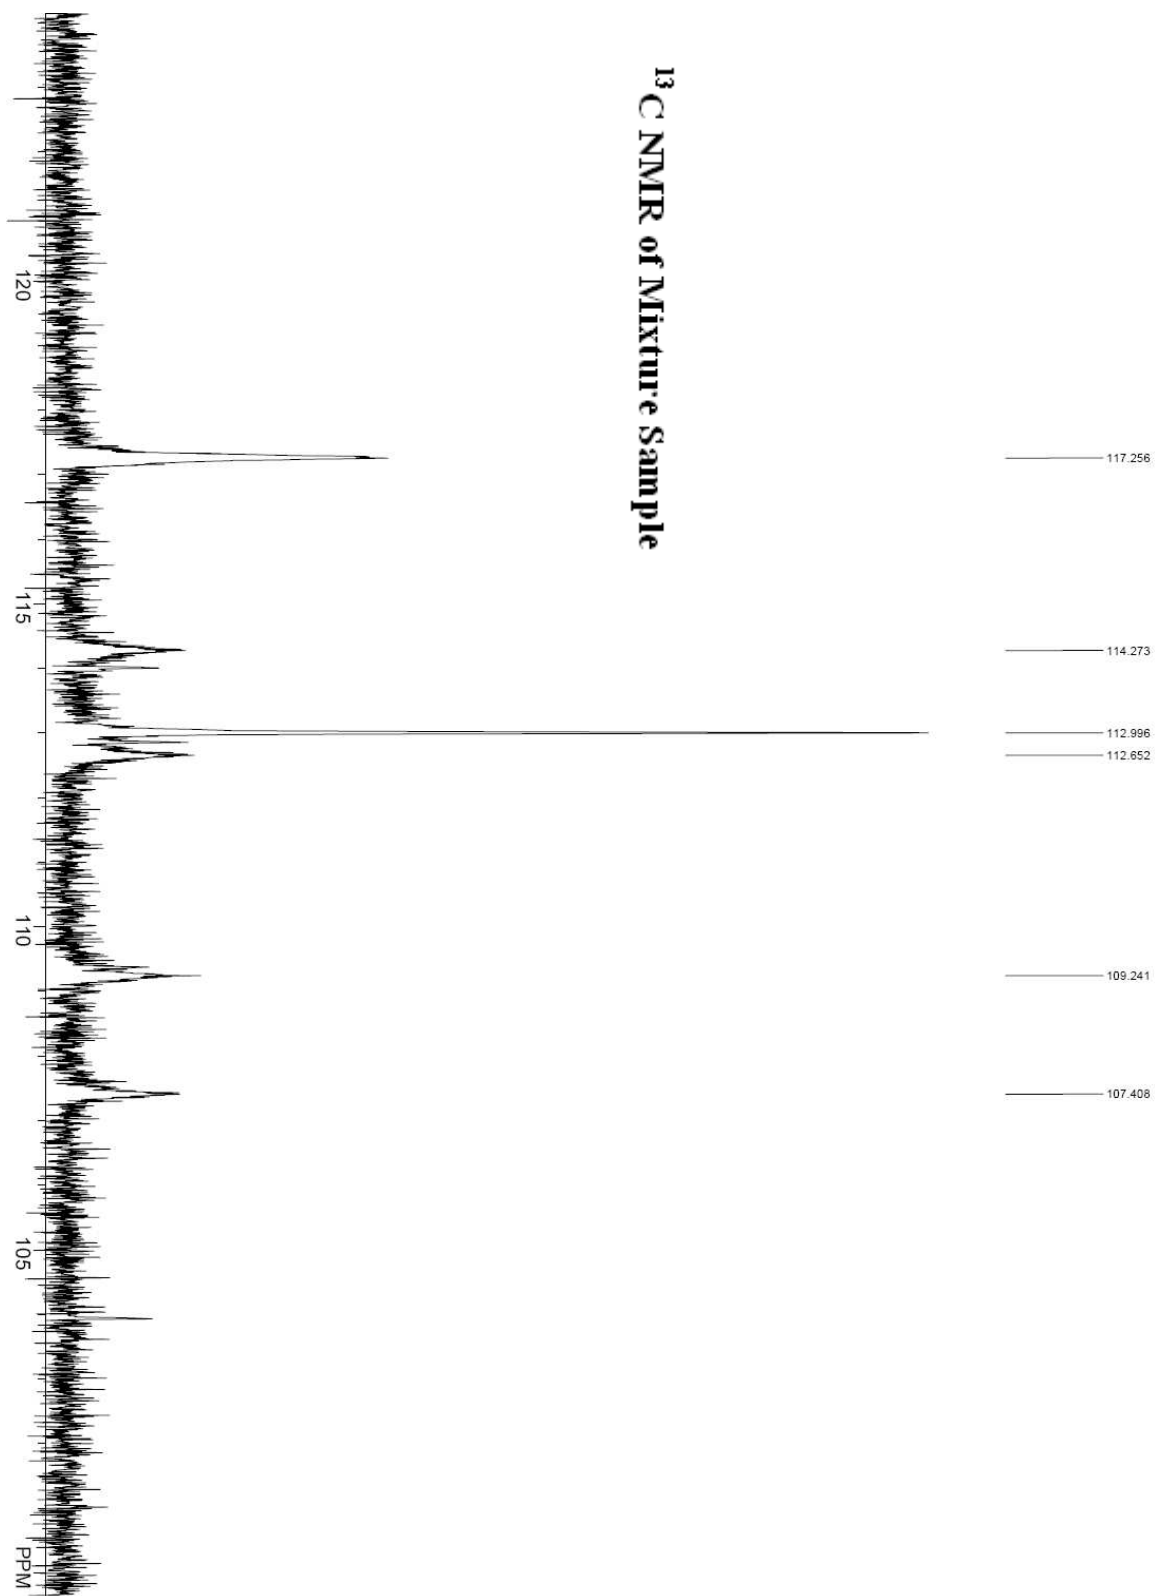

**$^{13}\text{C}$  NMR of Mixture Sample**

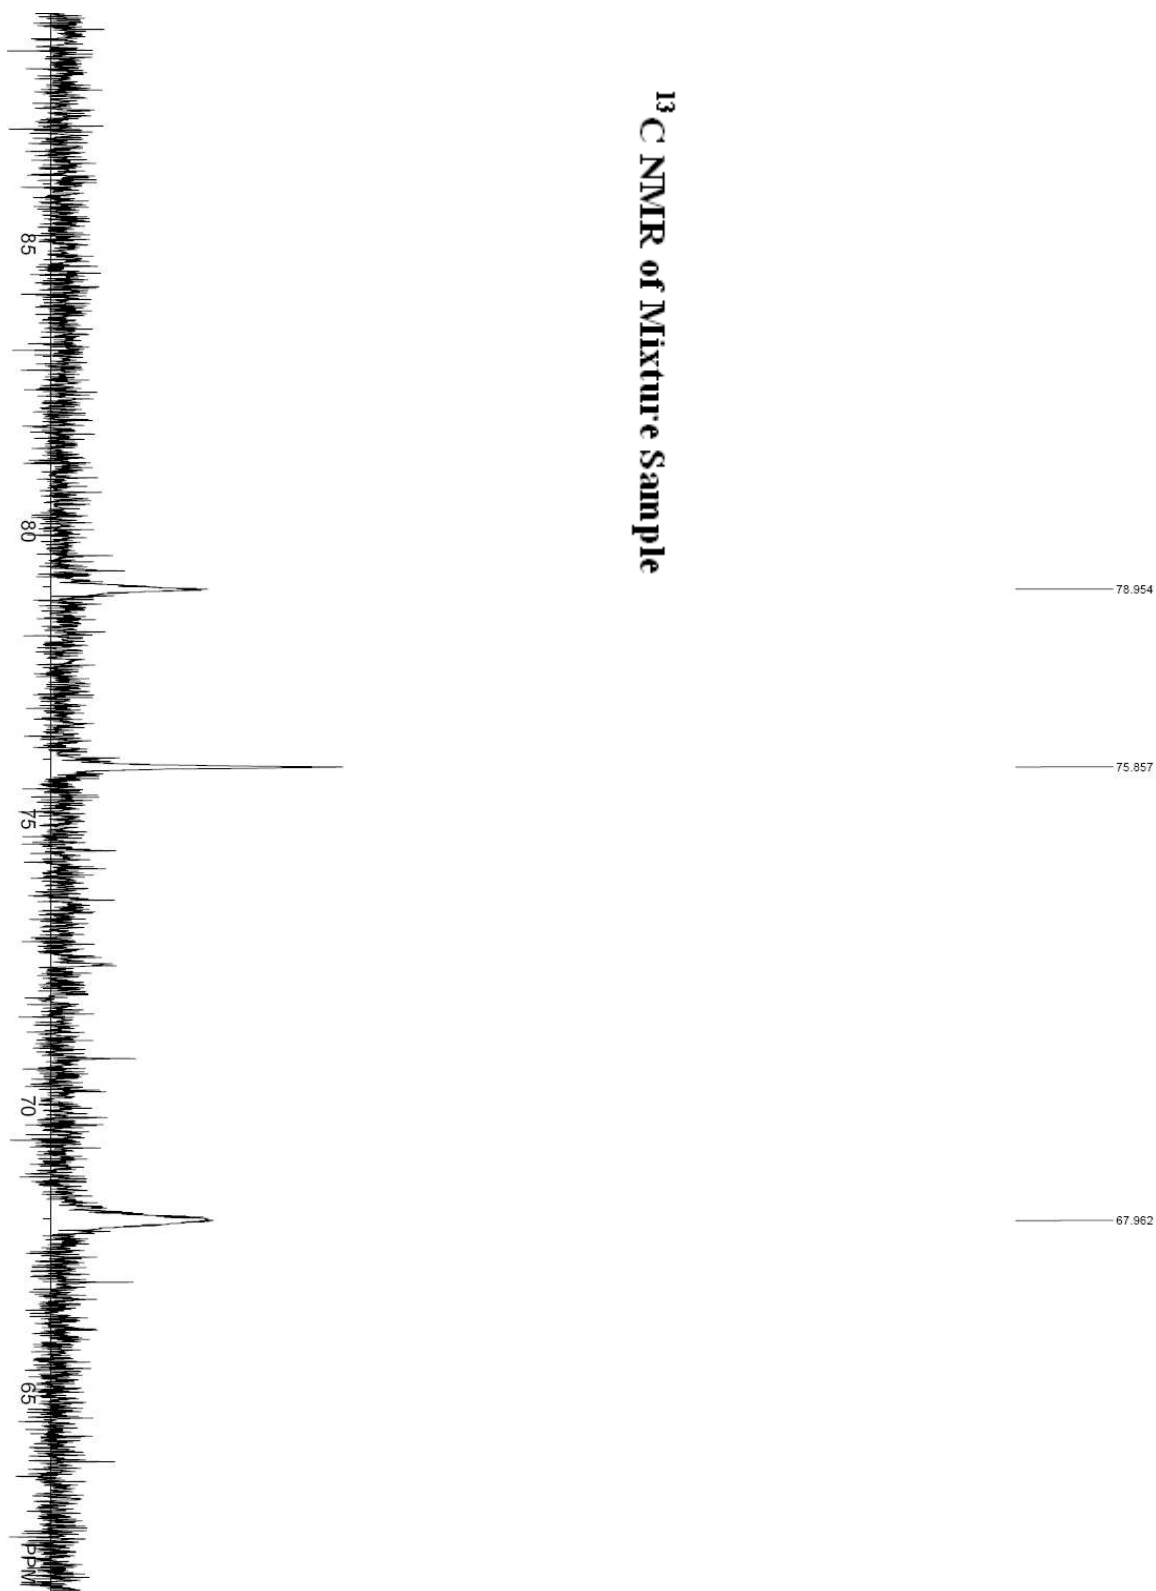

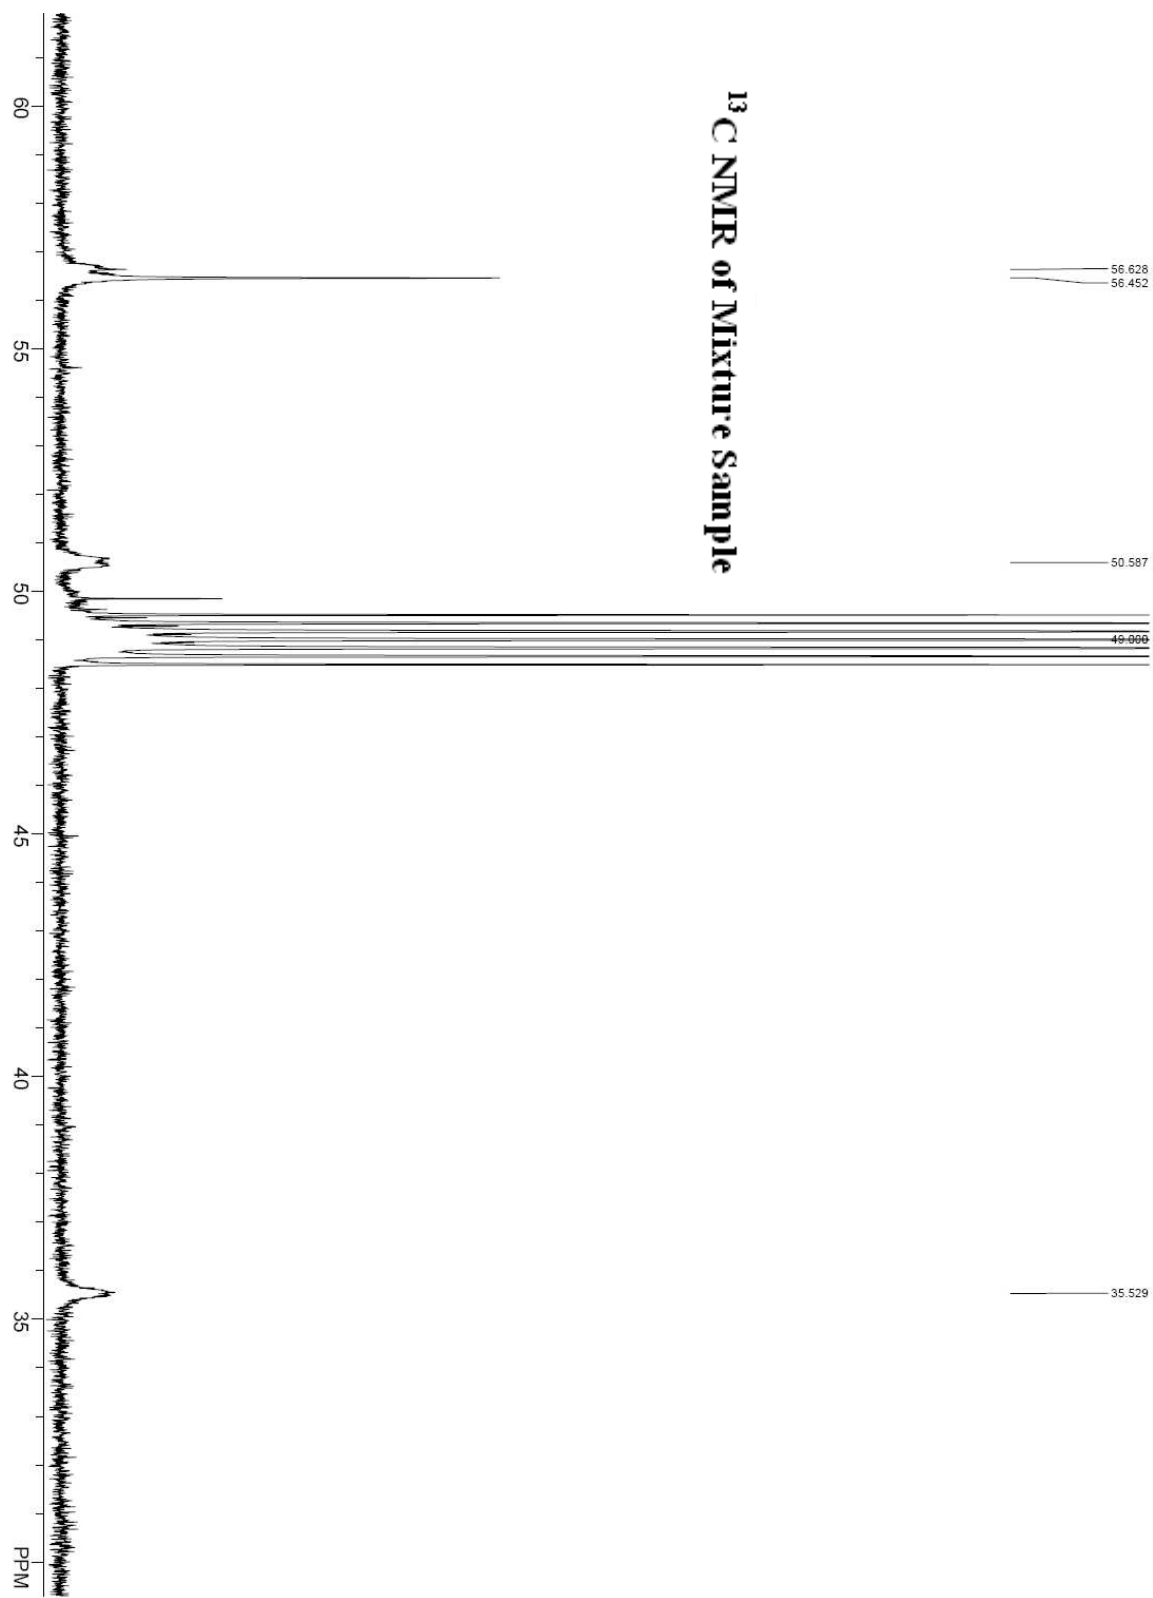

VT-<sup>1</sup>H NMR of Authentic Sample, Synthetic Sample and Mixture Sample of (-)-Plicatic Acid

## Authentic Sample

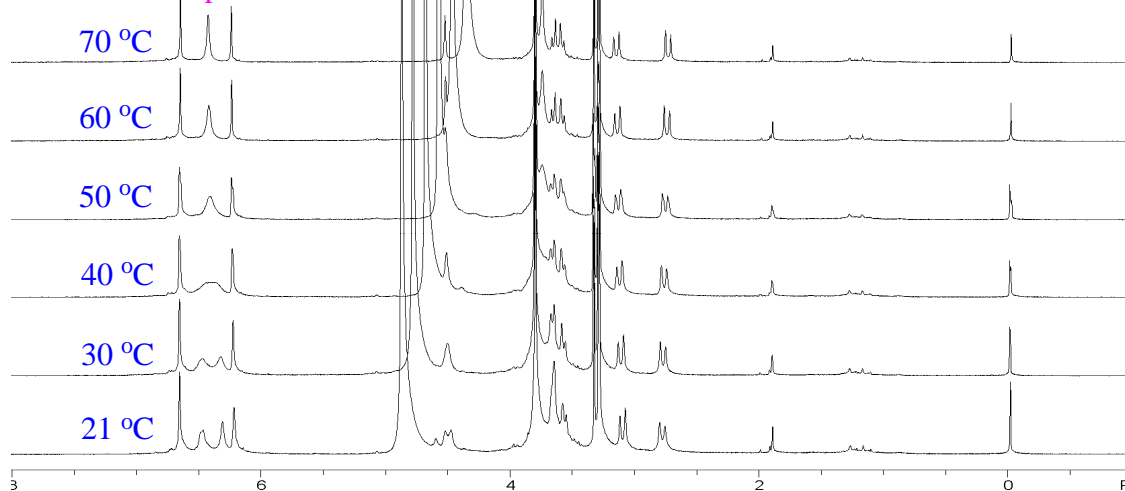

## Synthetic Sample

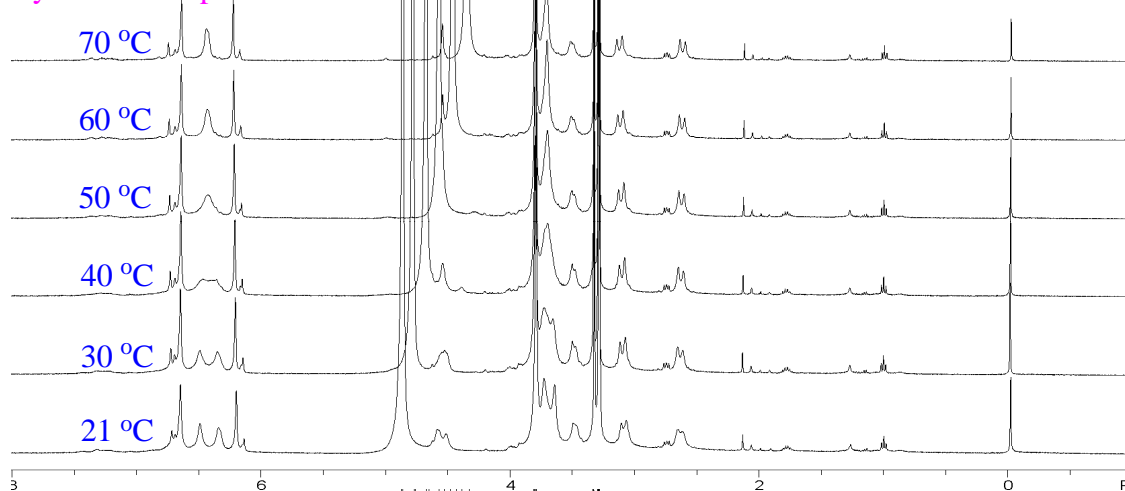

## Mixture Sample

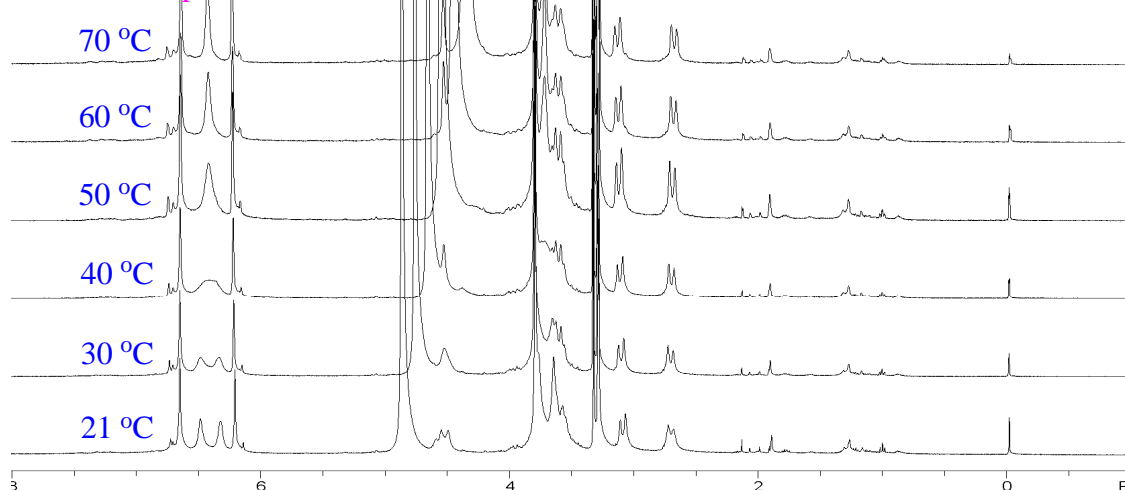

$^1\text{H}$  NMR Spectra of Authentic Sample, Synthetic Sample and Mixture Sample of (-)-Plicatic Acid (**1**) at 70 °C

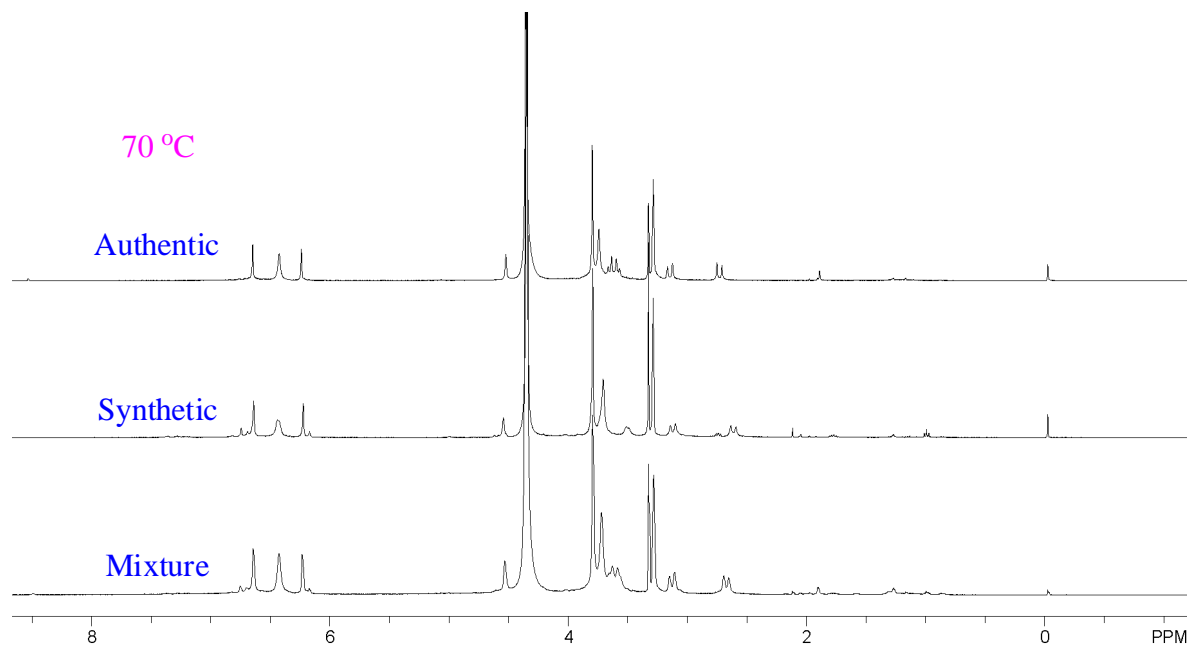

## IR of Synthetic Sample of (-)-Plicatic Acid

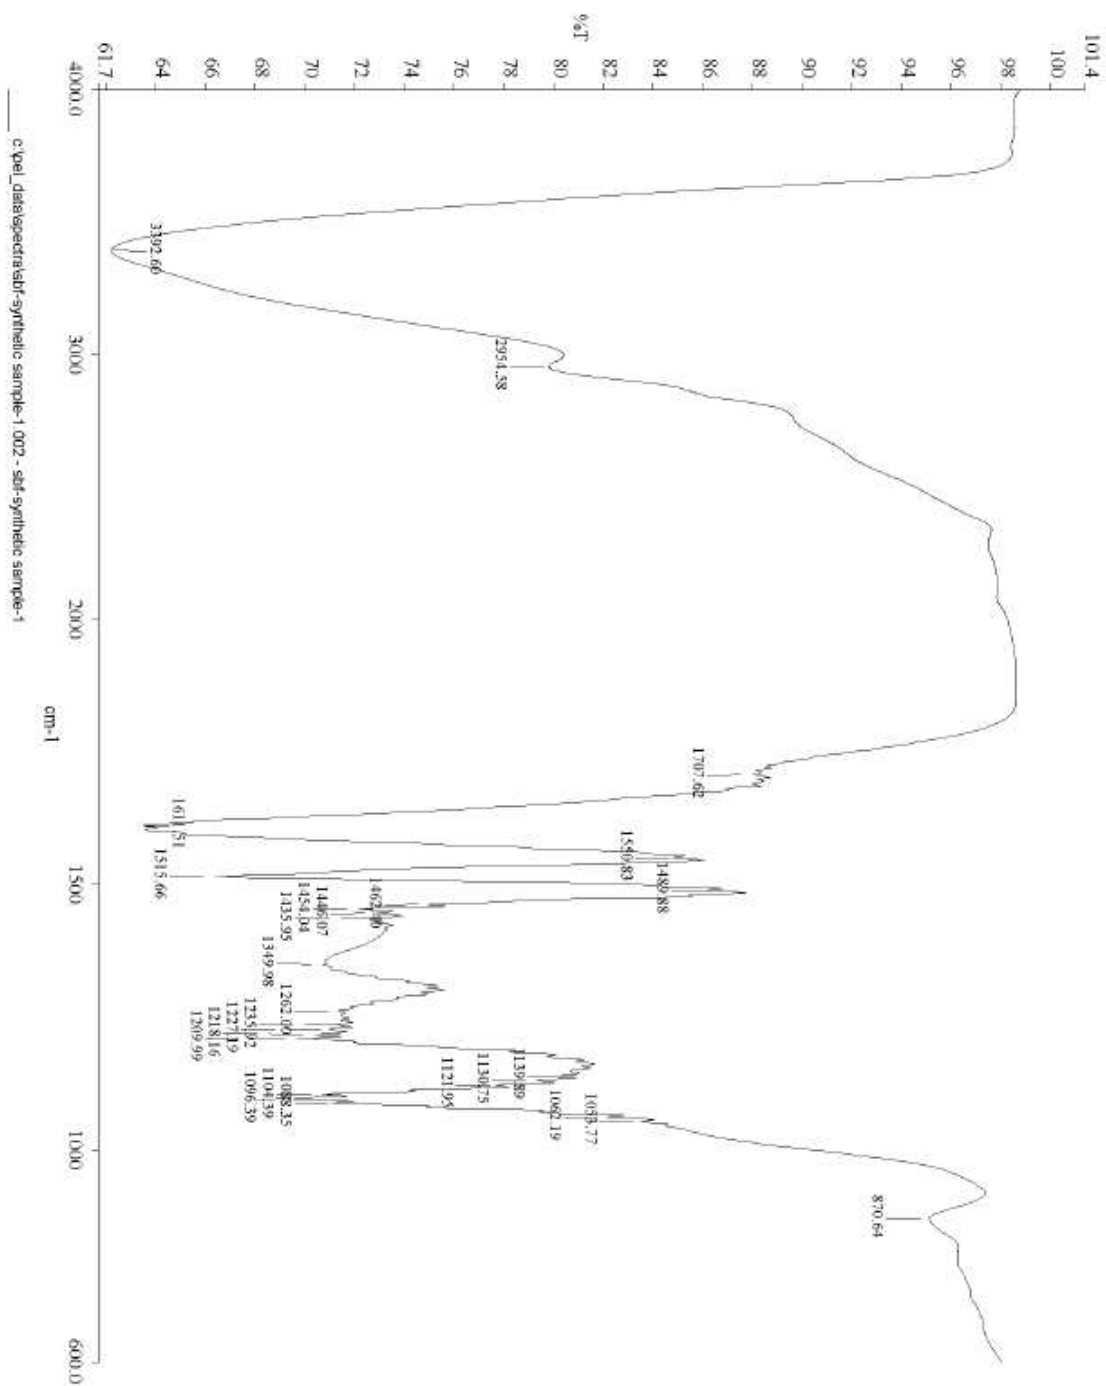



## IR of Authentic Sample of (-)-Plicatic Acid

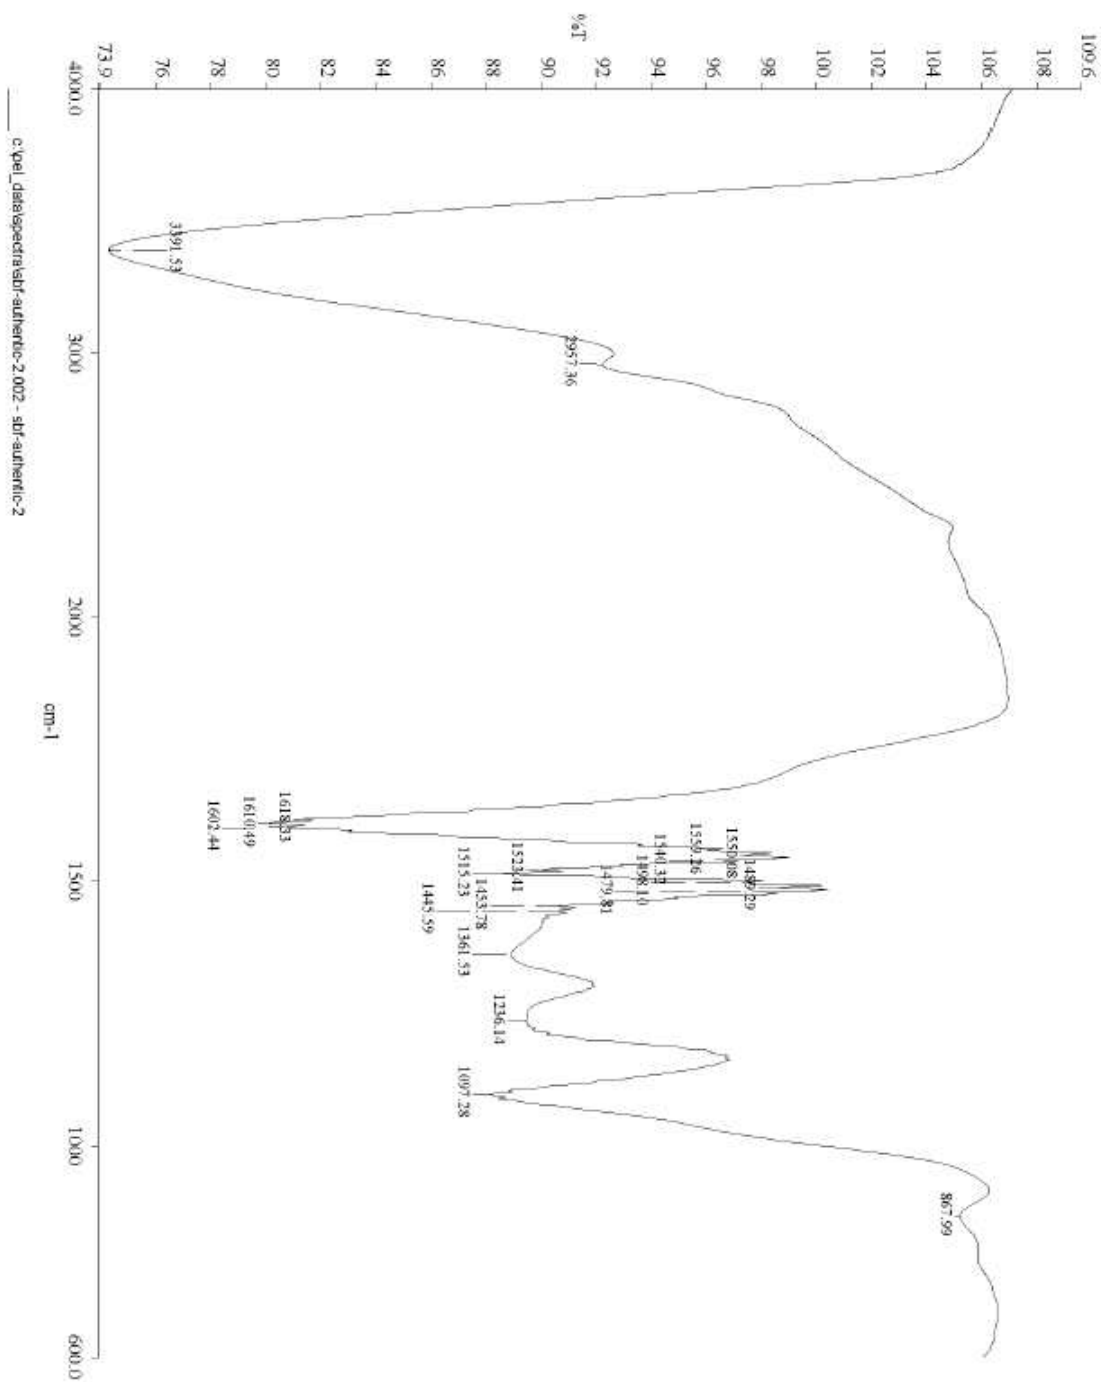

## MS and HRMS of Synthetic Sample of (-)-Plicatic Acid

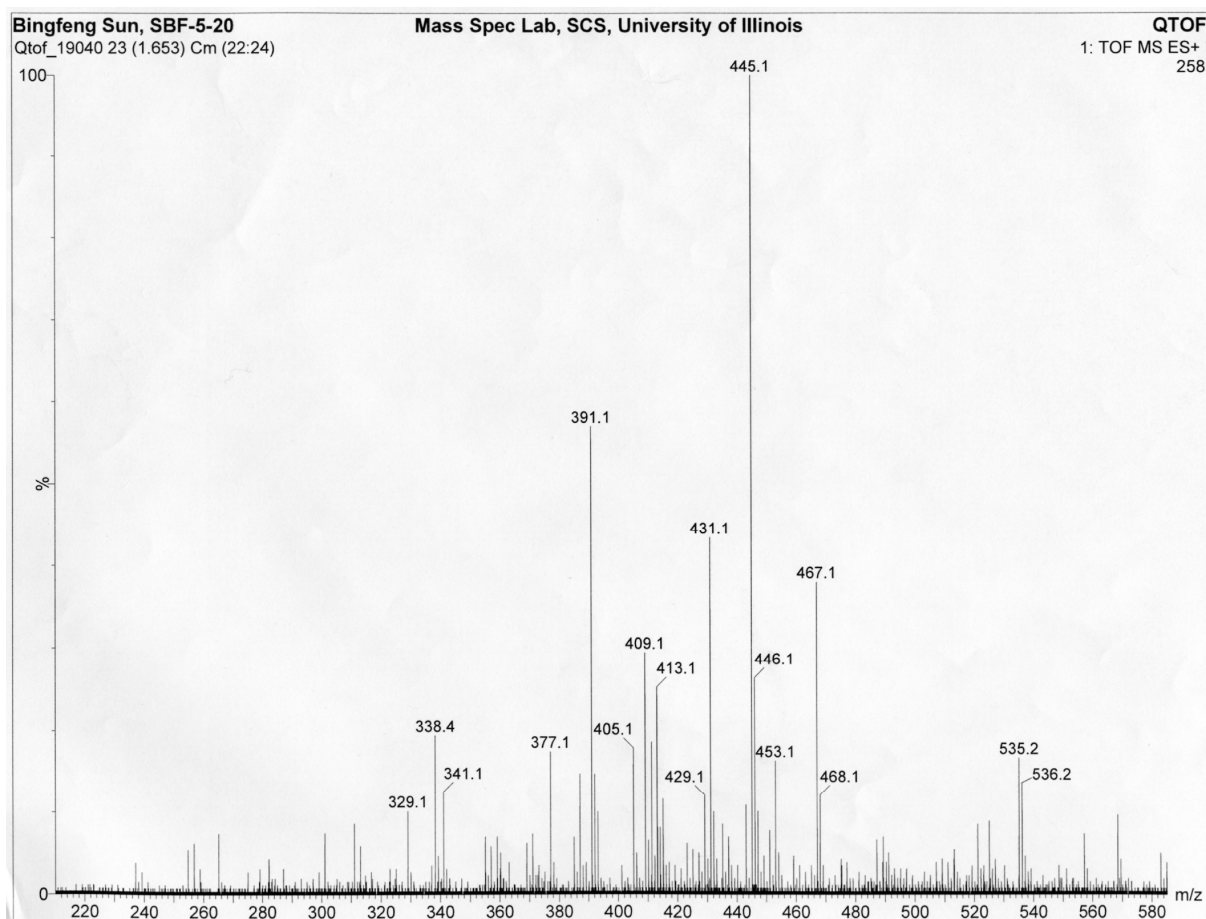

## Elemental Composition Report

Page 1

## Single Mass Analysis

Tolerance = 10.0 PPM / DBE: min = -1.5, max = 100.0

Selected filters: None

## Monoisotopic Mass, Even Electron Ions

25 formula(e) evaluated with 2 results within limits (up to 50 best isotopic matches for each mass)

Elements Used:

C: 0-150 H: 0-200 O: 9-11 Na: 0-1

Bingfeng Sun, SBF-5-20

Mass Spec Lab, SCS, University of Illinois

Qtof\_19040 23 (1.653) AM (Cen,3, 80.00, Ar,14000.0,716.46,0.70,LS 3); Sm (SG, 2x3.00); Cm (22:24)

QTOF  
1: TOF MS ES+  
2.15e3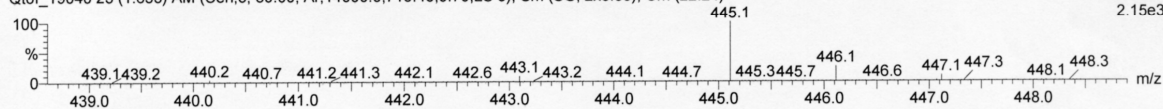

Minimum: -1.5  
Maximum: 100.0

| Mass     | Calc. Mass | mDa  | PPM  | DBE  | i-FIT | Formula                                            |
|----------|------------|------|------|------|-------|----------------------------------------------------|
| 445.1112 | 445.1111   | 0.1  | 0.2  | 9.5  | 28.1  | C <sub>20</sub> H <sub>22</sub> O <sub>10</sub> Na |
|          | 445.1135   | -2.3 | -5.2 | 12.5 | 22.6  | C <sub>22</sub> H <sub>21</sub> O <sub>10</sub>    |

## MS and HRMS of Authentic Sample of (-)-Plicatic Acid

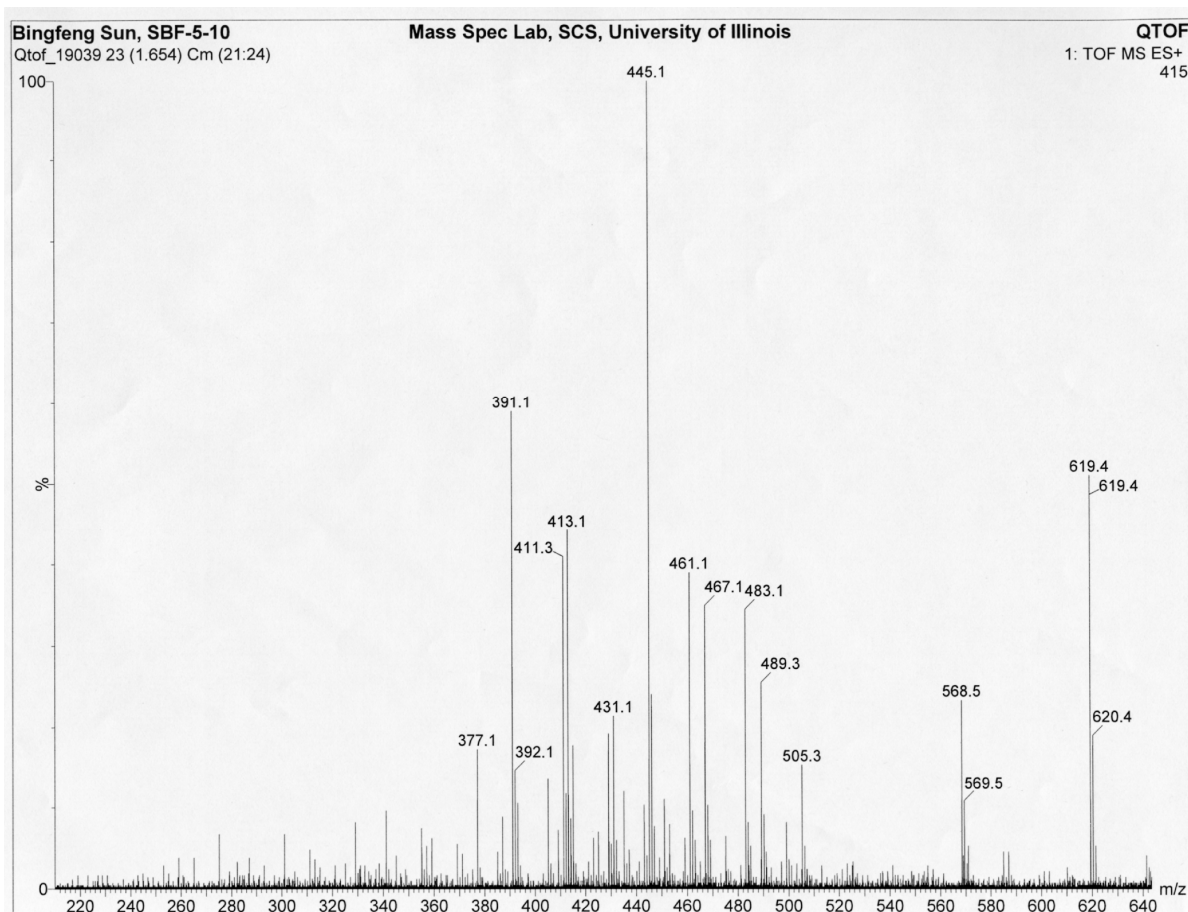

## Elemental Composition Report

Page 1

## Single Mass Analysis

Tolerance = 10.0 PPM / DBE: min = -1.5, max = 100.0

Selected filters: None

## Monoisotopic Mass, Even Electron Ions

25 formula(e) evaluated with 2 results within limits (up to 50 best isotopic matches for each mass)

Elements Used:

C: 0-150 H: 0-200 O: 9-11 Na: 0-1

Bingfeng Sun, SBF-5-10

Mass Spec Lab, SCS, University of Illinois

Qtof\_19039 23 (1.654) AM (Cen,3, 80.00, Ar,14000.0,716.46,0.70,LS 3); Sm (SG, 2x3.00); Cm (22:24)

QTOF  
1: TOF MS ES+  
2.59e3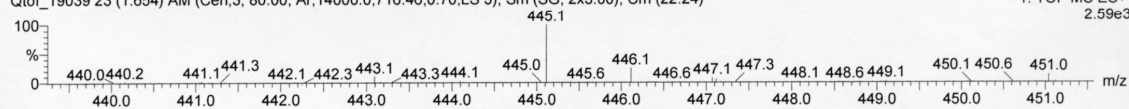

Minimum: -1.5  
 Maximum: 100.0

| Mass     | Calc. Mass | mDa  | PPM  | DBE  | i-FIT | Formula                                            |
|----------|------------|------|------|------|-------|----------------------------------------------------|
| 445.1111 | 445.1111   | 0.0  | 0.0  | 9.5  | 1.2   | C <sub>20</sub> H <sub>22</sub> O <sub>10</sub> Na |
|          | 445.1135   | -2.4 | -5.4 | 12.5 | 0.7   | C <sub>22</sub> H <sub>21</sub> O <sub>10</sub>    |

## HPLC Chromatograms of Synthetic, Mixture and Authentic Sample on Two Columns

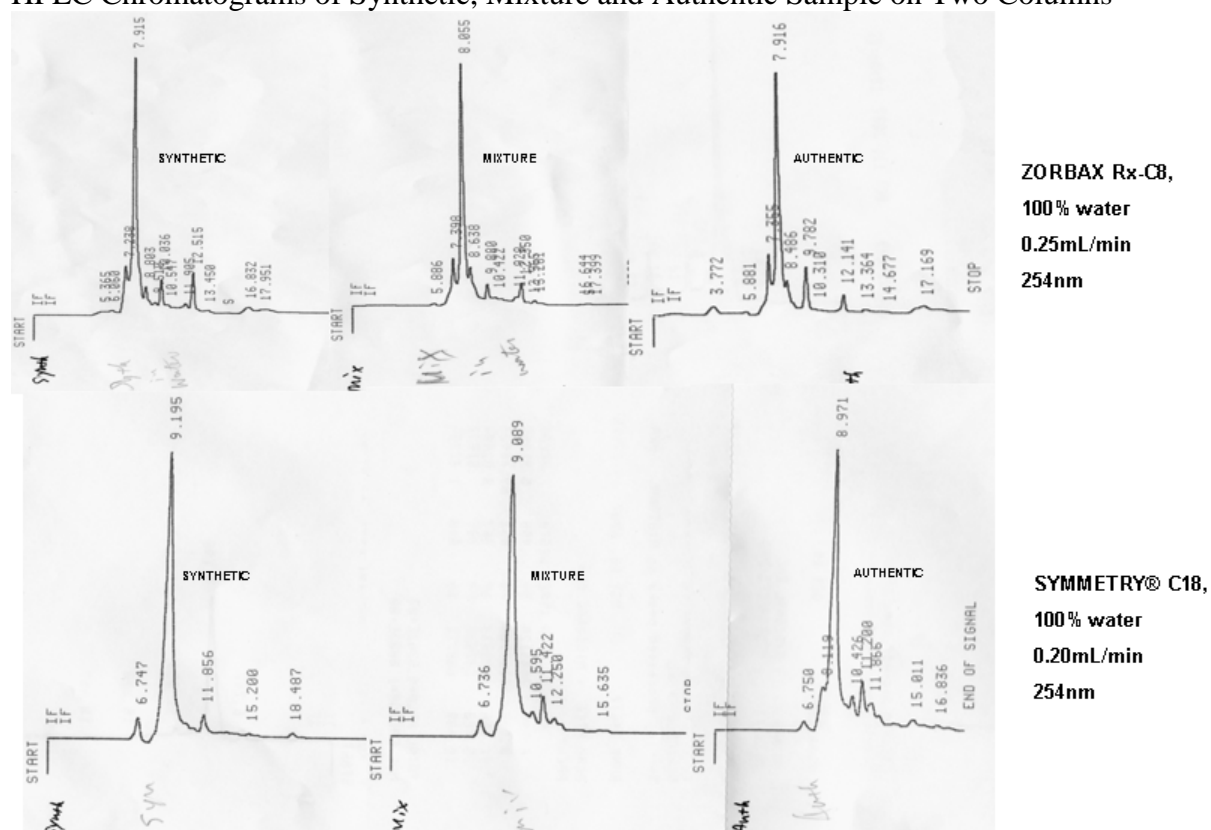

## CD Spectra of Synthetic and Authentic Sample of (-)-Plicatic Acid

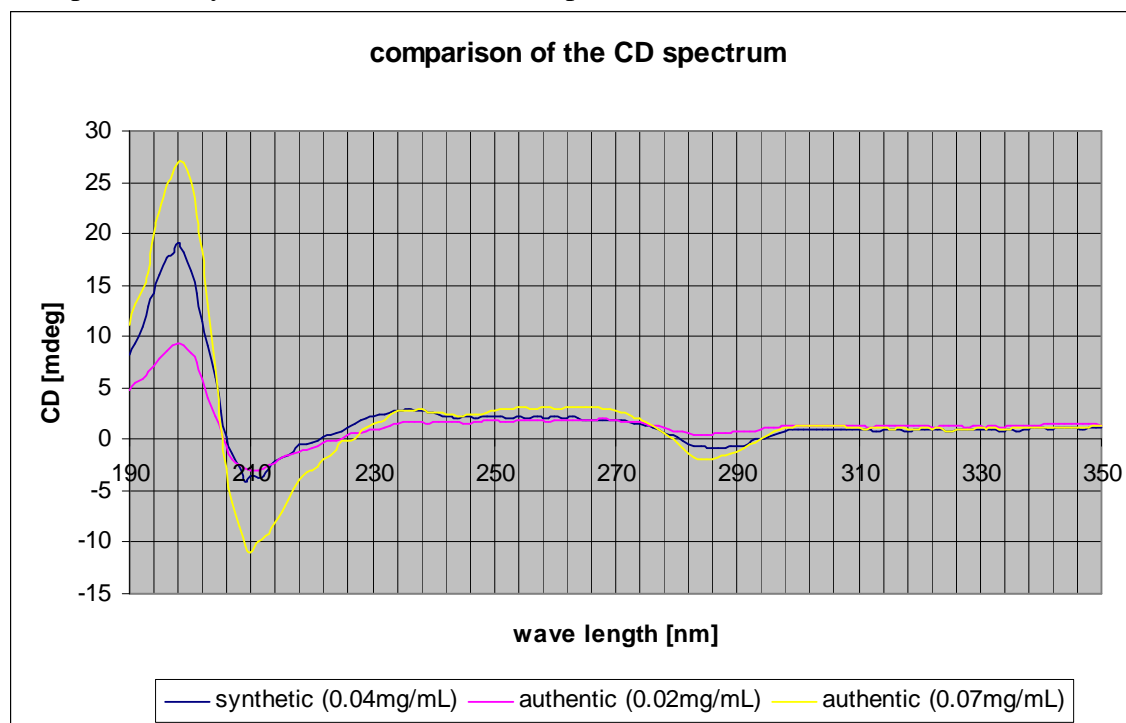

Supplement: NIHMS132644-supplement-1_si_001.pdf [file NIHMS132644-supplement-1_si_001.pdf]
